# Supplementary material for: Synthesis of diversely substituted quinazoline-2,4(1H,3H)-diones by cyclization of tert-butyl (2-cyanoaryl)carbamates
Source: Royal Society of Chemistry journal article supplement (doi:10.1039/d4ob00885e), 2024-01-01

## Supporting Information

### Table of Contents

|   |                                                   |         |
|---|---------------------------------------------------|---------|
| 1 | General Information                               | S1      |
| 2 | Experimental procedures                           | S2      |
| 3 | Characterization Data of 2a-2p                    | S3-S9   |
| 4 | Characterization Data of Natural products         | S8-S10  |
| 5 | Characterization Data of 1b-1q                    | S10-S17 |
| 6 | NMR ( <sup>1</sup> H and <sup>13</sup> C) Spectra | S18-S56 |

#### General Information:

The reagents and solvents were obtained from commercial suppliers and used without further purification. <sup>1</sup>H and <sup>13</sup>C NMR spectra were recorded on an instrument at 400 MHz for <sup>1</sup>H and 101 MHz for <sup>13</sup>C using dimethyl sulfoxide (DMSO-d<sub>6</sub>) as a solvent. Chemical shifts are in parts per million (ppm) and were referenced to the residual proton peaks in deuterated solvents. Mass spectra were recorded with an LCMS (Agilent). LCMS analysis was performed using a Kinetex XB- C18 column (75x3mm) 2.6 μm. High-resolution mass spectrometry (HRMS) data were measured on Thermo Orbitrap Exploris spectrometer. Standard column chromatography was performed using 100-200 mesh silica gel. Reverse-phase HPLC purification was performed using a Kinetex XB - C18 column (250 mm × 30 mm, 10 μm) eluting with a gradient of MeCN/water containing 10 mM Ammonium formate.

## Experimental Section

### General procedure: Synthesis of 1b-1p:

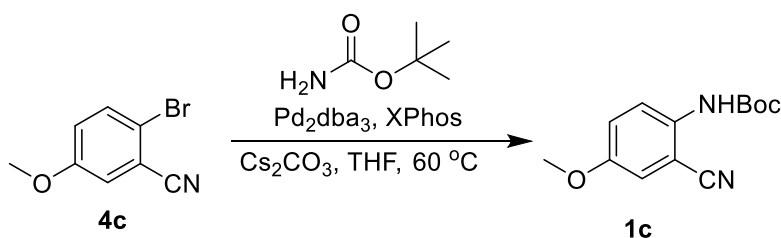

A mixture of 2-bromo-5-methoxybenzonitrile **4c** (1 mmol, 1 eq), *tert*-butyl carbamate (2 mmol, 2 eq), and Cs<sub>2</sub>CO<sub>3</sub> (2 mmol, 2 eq) in THF (6 mL) was purged with N<sub>2</sub> gas for 5 min and then added Pd<sub>2</sub>dba<sub>3</sub> (0.05 eq) and XPhos (0.1 eq) under N<sub>2</sub> atmosphere at room temperature. The reaction mixture was stirred at 60 °C for 4 h. After completion of starting material, the reaction mixture was filtered through a pad of Celite, and filtrate was concentrated under reduced pressure afforded crude residue. The residue was purified by silica gel column chromatography (30% EtOAc/hexanes) to afford *tert*-butyl (2-cyano-4-methoxyphenyl)carbamate **1c** (670 mg, 58% yield) as an off-white solid.

### General procedure for synthesis of quinazoline-2,4(1*H*,3*H*)-dione:

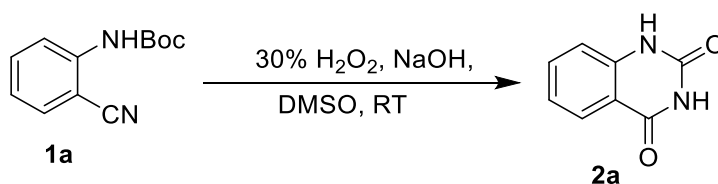

To a stirred solution of *tert*-butyl (2-cyanophenyl)carbamate **1a** (1 mmol, 1 eq) in DMSO (2 mL) were added NaOH (6 eq) followed by 35% H<sub>2</sub>O<sub>2</sub> (1 eq) at 0 °C under N<sub>2</sub> atmosphere. The reaction mixture was stirred at room temperature for 16 h. The reaction was monitored by TLC and UPLC. After completion of starting material, the reaction mixture was quenched with 10% sodium metabisulfite solution and stirred for 5 min and extracted with EtOAc (3x50 mL). The combined organic layers were dried over Na<sub>2</sub>SO<sub>4</sub>, filtered, and concentrated in *vacuo* afforded crude residue. The crude residue was purified by Reverse-phase column chromatography to afford quinazoline-2,4(1*H*,3*H*)-dione **2a** as a white solid.

### Quinazoline-2,4(1*H*,3*H*)-dione (**2a**):

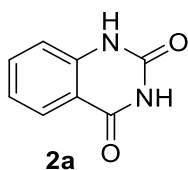

Quinazoline-2,4(1*H*,3*H*)-dione **2a** (160 mg, 0.987 mmol) was synthesised from *tert*-butyl (2-cyanophenyl)carbamate **1a** (218 mg, 1 mmol) by following the general procedure. Yield: 98%; White solid. Melting point: melting not observed, decomposed at ~380 °C. <sup>1</sup>H NMR (400 MHz, DMSO-*d*<sub>6</sub>): δ 11.18 (brs, 2H), 7.88 (dd, *J* = 8.51, 1.50 Hz, 1H), 7.63 (td, *J* = 7.76, 1.50 Hz, 1H), 7.19 - 7.15 (m, 2 H). <sup>13</sup>C NMR (101 MHz, DMSO-*d*<sub>6</sub>): δ = 162.79, 150.27, 140.87, 134.90, 126.91, 122.26, 115.29, 114.30. HRMS (ESI-TOF) *m/z*: calcd for C<sub>8</sub>H<sub>7</sub>N<sub>2</sub>O<sub>2</sub> (M+H)<sup>+</sup> 163.0508, found 163.0494.

### 6-Methylquinazoline-2,4(1*H*,3*H*)-dione (**2b**):

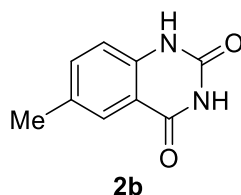

6-Methylquinazoline-2,4(1*H*,3*H*)-dione **2b** (170 mg, 0.965 mmol) was synthesised from *tert*-butyl (2-cyano-4-methylphenyl)carbamate **1b** (232 mg, 1 mmol) by following the general procedure. Yield: 96%; White solid. Melting point = 313 – 316 °C. <sup>1</sup>H NMR (400 MHz, DMSO-*d*<sub>6</sub>): δ 11.10 (brs, 1H), 7.68 (m, 1H), 7.45 (dd, *J* = 2.0, 8.4 Hz, 1H), 7.06 (d, *J* = 8.3 Hz, 1H), 2.32 (s, 2H). <sup>13</sup>C NMR (101 MHz, DMSO-*d*<sub>6</sub>): δ 162.80, 150.25, 138.69, 135.93, 131.50, 126.44, 115.25, 114.13, 20.19. HRMS (ESI-TOF) *m/z*: calcd for C<sub>9</sub>H<sub>9</sub>N<sub>2</sub>O<sub>2</sub> (M+H)<sup>+</sup> 177.0664, found 177.0653.

### 6-Methoxyquinazoline-2,4(1*H*,3*H*)-dione (**2c**):

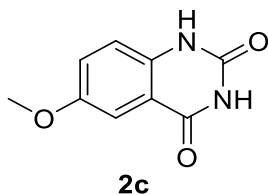

6-Methoxyquinazoline-2,4(1*H*,3*H*)-dione **2c** (190 mg, 0.984 mmol) was synthesised from *tert*-butyl (2-cyano-4-methoxyphenyl) carbamate **1c** (248 mg, 1 mmol) by following the general procedure. Yield: 98%; Off-white solid. Melting point = 313 – 315 °C. <sup>1</sup>H NMR (400 MHz, DMSO-*d*<sub>6</sub>): δ 10.94 (brs, 2H), 7.33 (d, *J* = 3.0 Hz, 1H), 7.30 - 7.25 (m, 1H), 7.12 (d, *J* = 8.5 Hz, 1H), 3.78 (s, 3H). <sup>13</sup>C NMR (101 MHz, DMSO-*d*<sub>6</sub>): δ 162.79, 154.45, 150.22, 135.28,

123.68, 117.01, 114.82, 107.96, 55.49. HRMS (ESI-TOF)  $m/z$ : calcd for  $C_9H_9N_2O_3$  (M+H)<sup>+</sup> 193.0613, found 193.0603.

**6-Fluoroquinazoline-2,4(1H,3H)-dione (2d):**

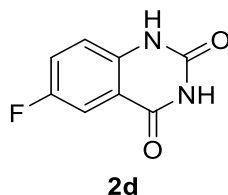

6-Fluoroquinazoline-2,4(1H,3H)-dione **2d** (173 mg, 0.961 mmol) was synthesised from *tert*-butyl (2-cyano-4-fluorophenyl)carbamate **1d** (236 mg, 1 mmol) by following the general procedure. Yield: 96%; White solid. Melting point = 295 – 297 °C. <sup>1</sup>H NMR (400 MHz, DMSO-*d*<sub>6</sub>): δ 11.52 - 11.05 (m, 2H), 7.65 - 7.43 (m, 2H), 7.20 (dd,  $J = 4.4, 9.0$  Hz, 1H). <sup>13</sup>C NMR (101 MHz, DMSO-*d*<sub>6</sub>): δ 161.95, 150.09, 143.76, 131.25 (m, 1C), 124.20 (q,  $J_{C,F} = 5.05$  Hz, 1C), 123.90 (q,  $J_{C,F} = 272.7$  Hz, 1C), 122.60 (q,  $J_{C,F} = 32.32$  Hz, 1C), 116.61, 114.48. <sup>19</sup>F NMR (376 MHz, DMSO-*d*<sub>6</sub>): δ -120.3. HRMS (ESI-TOF)  $m/z$ : calcd for  $C_8H_4FN_2O_2$  (M-H)<sup>+</sup> 179.0257, found 179.0260.

**6-Chloroquinazoline-2,4(1H,3H)-dione (2e):**

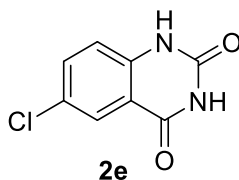

6-Chloroquinazoline-2,4(1H,3H)-dione **2e** (183 mg, 0.933 mmol) was synthesised from *tert*-butyl (4-chloro-2-cyanophenyl)carbamate **1e** (252 mg, 1 mmol) by following the general procedure. Yield: 93%; White solid. Melting point = 285 – 287 °C. <sup>1</sup>H NMR (400 MHz, DMSO-*d*<sub>6</sub>): δ 10.88 (brs, 2H), 7.81 (d,  $J = 2.0$  Hz, 1H), 7.68 (dd,  $J = 2.8, 8.8$  Hz, 1H), 7.19 (d,  $J = 9.0$  Hz, 1H). <sup>13</sup>C NMR (101 MHz, DMSO-*d*<sub>6</sub>): δ 161.79, 150.01, 139.74, 134.77, 126.23, 125.88, 117.52, 115.76. HRMS (ESI-TOF)  $m/z$ : calcd for  $C_8H_4ClN_2O_2$  (M-H)<sup>+</sup> 194.9961, found 194.9965.

**6-(Trifluoromethyl)quinazoline-2,4(1H,3H)-dione (2f):**

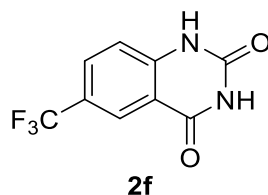

6-(Trifluoromethyl)quinazoline-2,4(1*H*,3*H*)-dione **2f** (147 mg, 0.639 mmol) was synthesised from *tert*-butyl (2-cyano-4-(trifluoromethyl)phenyl)carbamate **1f** (286 mg, 1 mmol) by following the general procedure. Yield: 64%; White solid. Melting point = 293 – 295 °C. <sup>1</sup>H NMR (400 MHz, DMSO-*d*<sub>6</sub>): δ 11.53 (brs, 2H), 8.10 (d, *J* = 1.5 Hz, 1H), 7.97 (dd, *J* = 2.0, 8.5 Hz, 1H), 7.34 (d, *J* = 8.5 Hz, 1H). <sup>13</sup>C NMR (101 MHz, DMSO-*d*<sub>6</sub>): δ 161.94, 150.09, 143.76, 131.27 (d, *J*<sub>C,F</sub> = 3.03 Hz, 1C), 124.17 (q, *J*<sub>C,F</sub> = 4.04 Hz, 1C), 123.89 (q, *J*<sub>C,F</sub> = 272 Hz, 1C), 122.57 (q, *J*<sub>C,F</sub> = 33.33 Hz, 1C), 116.60, 114.48. <sup>19</sup>F NMR (376 MHz, DMSO-*d*<sub>6</sub>): δ –60.6. HRMS (ESI-TOF) *m/z*: calcd for C<sub>9</sub>H<sub>4</sub>F<sub>3</sub>N<sub>2</sub>O<sub>2</sub> (M-H)<sup>+</sup> 229.0225, found 229.0228.

**7-Methylquinazoline-2,4(1*H*,3*H*)-dione (2g):**

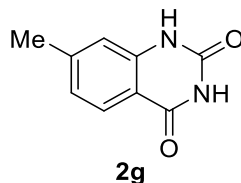

7-Methylquinazoline-2,4(1*H*,3*H*)-dione **2g** (120 mg, 0.681 mmol) was synthesised from *tert*-butyl (2-cyano-5-methylphenyl)carbamate **1g** (232 mg, 1 mmol) by following the general procedure. Yield: 68%; White solid. Melting point = 285 – 288 °C. <sup>1</sup>H NMR (400 MHz, DMSO-*d*<sub>6</sub>): δ 11.20 (brs, 2H), 8.51 (s, 1H), 7.77 (d, *J* = 7.9 Hz, 1H), 7.02 - 6.97 (m, 2H), 2.36 (s, 3H). <sup>13</sup>C NMR (101 MHz, DMSO-*d*<sub>6</sub>): δ 162.71, 150.49, 145.50, 141.03, 126.86, 123.56, 115.09, 112.03, 21.41. HRMS (ESI-TOF) *m/z*: calcd for C<sub>9</sub>H<sub>9</sub>N<sub>2</sub>O<sub>2</sub> (M+H)<sup>+</sup> 177.0664, found 177.0648.

**7-Methoxyquinazoline-2,4(1*H*,3*H*)-dione (2h):**

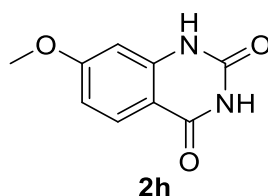

7-Methoxyquinazoline-2,4(1*H*,3*H*)-dione **2h** (143 mg, 0.739 mmol) was synthesised from *tert*-butyl (2-cyano-5-methoxyphenyl)carbamate **1h** (248 mg, 1 mmol) by following the general procedure. Yield: 74%; White solid. Melting point: melting not observed, decomposed

between 314 – 327 °C. <sup>1</sup>H NMR (400 MHz, DMSO-d<sub>6</sub>): δ 11.03 (brs, 2H), 7.79 (d, *J* = 8.9 Hz, 1H), 6.76 (dd, *J* = 2.4, 8.8 Hz, 1H), 6.62 (d, *J* = 2.4 Hz, 1H), 3.82 (s, 3H). <sup>13</sup>C NMR (101 MHz, DMSO-d<sub>6</sub>): δ 164.34, 162.32, 150.53, 142.80, 128.81, 110.48, 107.66, 98.32, 55.59. HRMS (ESI-TOF) *m/z*: calcd for C<sub>9</sub>H<sub>7</sub>N<sub>2</sub>O<sub>3</sub> (M-H)<sup>+</sup> 191.0457, found 191.0460.

**7-Fluoroquinazoline-2,4(1*H*,3*H*)-dione (2i):**

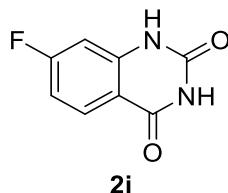

7-Fluoroquinazoline-2,4(1*H*,3*H*)-dione **2i** (130 mg, 0.722 mmol) was synthesised from *tert*-butyl (2-cyano-5-fluorophenyl)carbamate **1i** (236 mg, 1 mmol) by following the general procedure. Yield: 72%; Off-white solid. Melting point: melting not observed, decomposed at between 354 – 364 °C. <sup>1</sup>H NMR (400 MHz, DMSO-d<sub>6</sub>): δ 11.25 (brs, 2H), 7.94 (dd, *J* = 6.2, 8.8 Hz, 1H), 7.02 (dt, *J* = 2.4, 8.7 Hz, 1H), 6.89 (dd, *J* = 2.4, 9.9 Hz, 1H). <sup>13</sup>C NMR (101 MHz, DMSO-d<sub>6</sub>): δ 165.78 (d, *J*<sub>C,F</sub> = 252 Hz, 1C), 161.94, 150.28, 142.90 (d, *J*<sub>C,F</sub> = 13.13 Hz, 1C), 130.17 (d, *J*<sub>C,F</sub> = 11.11 Hz, 1C), 111.33, 110.27 (d, *J*<sub>C,F</sub> = 23.23 Hz, 1C), 101.49 (d, *J*<sub>C,F</sub> = 26.26 Hz, 1C). <sup>19</sup>F NMR (376 MHz, DMSO-d<sub>6</sub>): δ -103.5. HRMS (ESI-TOF) *m/z*: calcd for C<sub>8</sub>H<sub>6</sub>FN<sub>2</sub>O<sub>2</sub> (M+H)<sup>+</sup> 181.0413, found 181.0397.

**7-Chloroquinazoline-2,4(1*H*,3*H*)-dione (2j):**

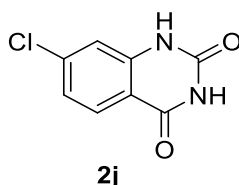

7-Chloroquinazoline-2,4(1*H*,3*H*)-dione **2j** (159 mg, 0.811 mmol) was synthesised from *tert*-butyl (5-chloro-2-cyanophenyl)carbamate **1j** (252 mg, 1 mmol) by following the general procedure. Yield: 81%; Brown solid. Melting point = 298 – 300 °C. <sup>1</sup>H NMR (400 MHz, DMSO-d<sub>6</sub>): δ 11.46 - 11.02 (m, 2H), 7.64 - 7.51 (m, 2H), 7.20 (dd, *J* = 4.5, 9.0 Hz, 1H). <sup>13</sup>C NMR (101 MHz, DMSO-d<sub>6</sub>): δ 165.99, 162.17, 150.31, 142.26, 139.24, 128.94, 122.35, 114.89, 113.31. HRMS (ESI-TOF) *m/z*: calcd for C<sub>8</sub>H<sub>4</sub>ClN<sub>2</sub>O<sub>2</sub> (M-H)<sup>+</sup> 194.9961, found 194.9965.

**7-(Trifluoromethyl)quinazoline-2,4(1*H*,3*H*)-dione (2k):**

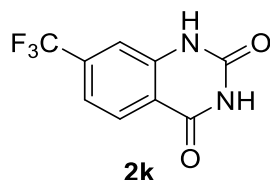

7-(Trifluoromethyl)quinazoline-2,4(1*H*,3*H*)-dione **2k** (156 mg, 0.677 mmol) was synthesised from *tert*-butyl (2-cyano-5-(trifluoromethyl)phenyl)carbamate **1k** (286 mg, 1 mmol) by following the general procedure. Yield: 67%; Off-white solid. Melting point: melting not observed, decomposed between 221 - 230 °C. <sup>1</sup>H NMR (400 MHz, DMSO-*d*<sub>6</sub>): δ 11.56 (brs, 2H), 8.07 (d, *J* = 8.3 Hz, 1H), 7.51 - 7.43 (m, 2H). <sup>13</sup>C NMR (101 MHz, DMSO-*d*<sub>6</sub>): δ 162.06, 150.26, 141.60, 134.08 (d, *J*<sub>C,F</sub> = 31.31 Hz, 1C), 128.58, 124.74 (m, 1C), 118.03 (d, *J*<sub>C,F</sub> = 3.03 Hz, 1C), 117.43, 112.44 (m, 1C). <sup>19</sup>F NMR (376 MHz, DMSO-*d*<sub>6</sub>): δ -62.1. HRMS (ESI-TOF) *m/z*: calcd for C<sub>9</sub>H<sub>4</sub>F<sub>3</sub>N<sub>2</sub>O<sub>2</sub> (M-H)<sup>+</sup> 229.0225, found 229.0223.

#### 5-Methylquinazoline-2,4(1*H*,3*H*)-dione (**2l**):

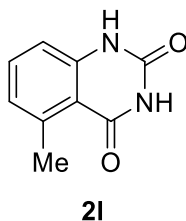

5-Methylquinazoline-2,4(1*H*,3*H*)-dione **2l** (154 mg, 0.875 mmol) was synthesised from *tert*-butyl (2-cyano-3-methylphenyl)carbamate **1l** (278 mg, 1 mmol) by following the general procedure. Yield: 87%; Brown solid. Melting point = 271 – 273 °C. <sup>1</sup>H NMR (400 MHz, DMSO-*d*<sub>6</sub>): δ 10.92 (brs, 2H), 7.44 (t, *J* = 7.8 Hz, 1H), 7.02 (d, *J* = 8.0 Hz, 1H), 6.93 (d, *J* = 7.4 Hz, 1H), 2.64 (s, 3H). <sup>13</sup>C NMR (101 MHz, DMSO-*d*<sub>6</sub>): δ 163.63, 150.04, 142.20, 140.92, 133.73, 125.12, 113.47, 112.46, 22.05. HRMS (ESI-TOF) *m/z*: calcd for C<sub>9</sub>H<sub>9</sub>N<sub>2</sub>O<sub>2</sub> (M+H)<sup>+</sup> 177.0664, found 177.0651.

#### 6,7-Dimethoxyquinazoline-2,4(1*H*,3*H*)-dione (**2m**):

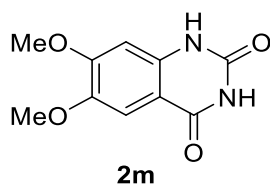

6,7-Dimethoxyquinazoline-2,4(1*H*,3*H*)-dione **2m** (201 mg, 0.905 mmol) was synthesised from *tert*-butyl (2-cyano-4,5-dimethoxyphenyl)carbamate **1m** (278 mg, 1 mmol)

by following the general procedure. Yield: 90%; Brown solid. Melting point = 319 – 321 °C.  $^1\text{H}$  NMR (400 MHz, DMSO- $d_6$ ):  $\delta$  8.42 (s, 2H), 7.25 (s, 1H), 6.73 (s, 1H), 3.82 (s, 3H), 3.78 (s, 3H).  $^{13}\text{C}$  NMR (101 MHz, DMSO- $d_6$ ):  $\delta$  162.41, 154.88, 150.38, 144.99, 136.61, 107.14, 106.18, 97.85, 55.80, 55.69. HRMS (ESI-TOF)  $m/z$ : calcd for  $\text{C}_{10}\text{H}_{11}\text{N}_2\text{O}_4$  ( $\text{M}+\text{H}$ ) $^+$  223.0719, found 223.0699.

**1-Methylquinazoline-2,4(1H,3H)-dione (2n):**

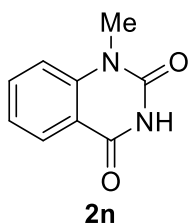

1-Methylquinazoline-2,4(1H,3H)-dione **2n** (136 mg, 0.772 mmol) was synthesised from *tert*-butyl (2-cyanophenyl)(methyl)carbamate **1n** (232 mg, 1 mmol) by following the general procedure. Yield: 77%; White solid. Melting point: melting not observed, decomposed above ~253 °C.  $^1\text{H}$  NMR (400 MHz, DMSO- $d_6$ ):  $\delta$  11.51 (brs, 1H), 7.98 (dd,  $J$  = 1.5, 7.5 Hz, 1H), 7.74 (ddd,  $J$  = 1.8, 7.1, 8.6 Hz, 1H), 7.40 (d,  $J$  = 8.5 Hz, 1H), 7.26 (t,  $J$  = 7.5 Hz, 1H), 3.43 (s, 3H).  $^{13}\text{C}$  NMR (101 MHz, DMSO- $d_6$ ):  $\delta$  161.78, 150.22, 141.66, 135.21, 127.28, 122.43, 115.54, 114.68, 29.44. HRMS (ESI-TOF)  $m/z$ : calcd for  $\text{C}_9\text{H}_9\text{N}_2\text{O}_2$  ( $\text{M}+\text{H}$ ) $^+$  177.0664, found 177.0649.

**Pyrido[2,3-d]pyrimidine-2,4(1H,3H)-dione (2o):**

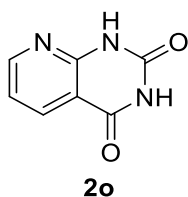

Pyrido[2,3-d]pyrimidine-2,4(1H,3H)-dione **2o** (117 mg, 0.717 mmol) was synthesised from *tert*-butyl (3-cyanopyridin-2-yl)carbamate **1o** (220 mg, 1 mmol) by following the general procedure. Yield: 71%; Off-white solid. Melting point = 315 – 317 °C.  $^1\text{H}$  NMR (400 MHz, DMSO- $d_6$ ):  $\delta$  11.65 (s, 1H), 11.45 (s, 1H), 8.59 (dd,  $J$  = 1.9, 4.8 Hz, 1H), 8.25 (dd,  $J$  = 1.6, 7.8 Hz, 1H), 7.24 (dd,  $J$  = 4.9, 7.8 Hz, 1H).  $^{13}\text{C}$  NMR (101 MHz, DMSO- $d_6$ ):  $\delta$  162.35, 154.52, 152.37, 150.37, 136.35, 118.83, 109.88. HRMS (ESI-TOF)  $m/z$ : calcd for  $\text{C}_7\text{H}_4\text{N}_3\text{O}_2$  ( $\text{M}-\text{H}$ ) $^+$  162.0304, found 162.0307.



### 6-Bromopyrido[2,3-d]pyrimidine-2,4(1H,3H)-dione (**2p**):

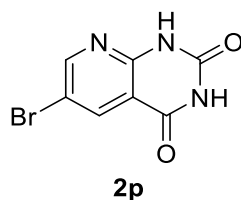

6-Bromopyrido[2,3-d]pyrimidine-2,4(1H,3H)-dione **2p** (220 mg, 0.912 mmol) was synthesised from *tert*-butyl (5-bromo-3-cyanopyridin-2-yl)carbamate **1p** (298 mg, 1 mmol) by following the general procedure. Yield: 91%; White solid. Melting point = 292 – 294 °C. <sup>1</sup>H NMR (400 MHz, DMSO-*d*<sub>6</sub>): δ 11.53 (brs, 2H), 8.71 (d, *J* = 2.5 Hz, 1H), 8.34 (d, *J* = 2.5 Hz, 1H). <sup>13</sup>C NMR (101 MHz, DMSO-*d*<sub>6</sub>): δ 161.39, 154.85, 151.29, 150.23, 137.83, 112.54, 111.61. HRMS (ESI-TOF) *m/z*: calcd for C<sub>7</sub>H<sub>3</sub>BrN<sub>3</sub>O<sub>2</sub> (M-H)<sup>+</sup> 239.9409, found 239.9413.

### Goshuyamide II:

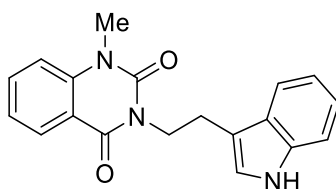

**Goshuyamide II**

To a stirred solution of 1-methylquinazoline-2,4(1H,3H)-dione **2n** (30 mg, 0.170 mmol) in DMF (1 mL) was added Cs<sub>2</sub>CO<sub>3</sub> (111 mg, 0.341 mmol) at room temperature and stirred for 15 min. To this reaction mixture, 3-(2-bromoethyl)-1H-indole **6** (38.2 mg, 0.170 mmol) was added and stirred at 80 °C for 16 h. The reaction was monitored by UPLC-MS. After completion starting material, the reaction mixture was quenched with ice cold water and extracted with EtOAc (3x20 mL). The combined organic layers were dried over Na<sub>2</sub>SO<sub>4</sub>, filtered, and concentrated in *vacuo* afforded crude residue which was purified by Prep-HPLC (ACN/H<sub>2</sub>O (5mM Ammonium formate)) followed by lyophilization afforded **Goshuyamide II** (39 mg, 0.117 mmol, 69% yield) as a white solid. Melting point = 220 – 222 °C. <sup>1</sup>H NMR (400 MHz, DMSO-*d*<sub>6</sub>): δ 10.84 (brs, 1H), 8.09 (dd, *J* = 1.5, 7.9 Hz, 1H), 7.79 (ddd, *J* = 1.6, 7.1, 8.5 Hz, 1H), 7.72 (d, *J* = 7.8 Hz, 1H), 7.47 (d, *J* = 8.4 Hz, 1H), 7.37 - 7.29 (m, 2H), 7.22 (d, *J* = 2.3 Hz, 1H), 7.08 (dt, *J* = 1.2, 7.5 Hz, 1H), 7.03 - 6.98 (m, 1H), 4.24 - 4.18 (m, 2H), 3.56 (s, 3H), 3.02 - 2.94 (m, 2H). <sup>13</sup>C NMR (101 MHz, DMSO-*d*<sub>6</sub>) δ 161.01, 150.27, 140.40, 136.28, 135.24, 127.74, 127.18, 122.81, 122.69, 121.00, 118.31, 114.85, 114.57, 111.41, 110.95, 41.80, 30.57, 23.44. HRMS (ESI-TOF) *m/z*: calcd for C<sub>19</sub>H<sub>18</sub>N<sub>3</sub>O<sub>2</sub> (M+H)<sup>+</sup> 320.1399, found 320.1381.

### 3-(4-Methoxyphenethyl)-1-methylquinazoline-2,4(1*H*,3*H*)-dione (Alkaloid):

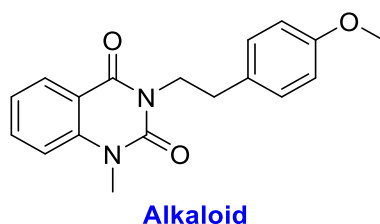

To a solution of 1-methylquinazoline-2,4(1*H*,3*H*)-dione **2n** (30 mg, 0.170 mmol) in DMF (1 mL) was added Cs<sub>2</sub>CO<sub>3</sub> (111 mg, 0.341 mmol) at room temperature and stirred for 15 min. To this reaction mixture, 1-(2-bromoethyl)-4-methoxybenzene **7** (36.6 mg, 0.170 mmol) was added and stirred at 80 °C for 16 h. The reaction was monitored by UPLC. After completion starting material, the reaction mixture was quenched with ice cold water and extracted with EtOAc (3x20 mL). The combined organic layers were dried over Na<sub>2</sub>SO<sub>4</sub>, filtered, and concentrated in reduced pressure afforded crude residue which was purified by Prep-HPLC (ACN/H<sub>2</sub>O (5mM Ammonium formate)) followed by lyophilization afforded 3-(4-methoxyphenethyl)-1-methylquinazoline-2,4(1*H*,3*H*)-dione (38 mg, 0.122 mmol, 72% yield) as a white solid. Melting point = 136 – 138 °C. <sup>1</sup>H NMR (400 MHz, DMSO-*d*<sub>6</sub>): δ 8.05 (dd, *J* = 1.5, 7.9 Hz, 1H), 7.78 (ddd, *J* = 1.7, 7.1, 8.6 Hz, 1H), 7.45 (d, *J* = 8.4 Hz, 1H), 7.34 - 7.28 (m, 1H), 7.19 - 7.13 (m, 2H), 6.89 - 6.84 (m, 2H), 4.13 - 4.07 (m, 2H), 3.72 (s, 3H), 3.53 (s, 3H), 2.83 - 2.77 (m, 2H). <sup>13</sup>C NMR (101 MHz, DMSO-*d*<sub>6</sub>): δ 160.88, 157.81, 150.14, 140.35, 135.26, 130.43, 129.53, 127.72, 122.70, 114.76, 114.58, 113.88, 54.96, 42.59, 32.39, 30.55. HRMS (ESI-TOF) *m/z*: calcd for C<sub>18</sub>H<sub>19</sub>N<sub>2</sub>O<sub>3</sub> (M+H)<sup>+</sup> 311.1396, found 311.1376.

### *tert*-Butyl (2-cyano-4-methylphenyl)carbamate (**1b**):

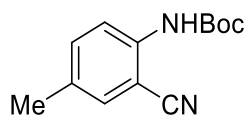

**1b**

*tert*-Butyl (2-cyano-4-methylphenyl)carbamate **1b** (738 mg, 3.181 mmol, 62%) was synthesised from 2-bromo-5-methylbenzonitrile (1 g, 5.102 mmol) by following the general procedure. Yellow solid; Melting point = 102 – 104 °C. <sup>1</sup>H NMR (400 MHz, DMSO-*d*<sub>6</sub>): δ 9.27 (s, 1H), 7.57 (d, *J* = 2.0 Hz, 1H), 7.45 (dd, *J* = 1.5, 8.3 Hz, 1H), 7.33 (d, *J* = 8.4 Hz, 1H), 2.30 (s, 3H), 1.46 (s, 9H). <sup>13</sup>C NMR (101 MHz, DMSO-*d*<sub>6</sub>): δ 153.03, 138.32, 134.78, 134.28, 132.90, 125.13, 117.07, 107.55, 79.71, 27.96, 19.87. LCMS: *m/z*: 233 [M+H]<sup>+</sup>. HRMS (ESI-TOF) *m/z*: calcd for C<sub>13</sub>H<sub>17</sub>N<sub>2</sub>O<sub>2</sub> (M+H)<sup>+</sup> 233.1290, found 233.1284.

***tert*-Butyl (2-cyano-4-methoxyphenyl)carbamate (1c):**

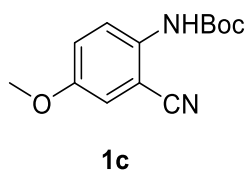

*tert*-Butyl (2-cyano-4-methoxyphenyl)carbamate **1c** (670 mg, 2.701 mmol, 58%) was synthesised from 2-bromo-5-methoxybenzonitrile (1 g, 4.716 mmol) by following the general procedure. Yellow solid; Melting point = 98 – 99 °C. <sup>1</sup>H NMR (400 MHz, DMSO-d<sub>6</sub>): δ 9.16 (brs, 1H), 7.36 - 7.29 (m, 2H), 7.24 - 7.19 (m, 1H), 3.78 (s, 3H), 1.45 (s, 9H). <sup>13</sup>C NMR (101 MHz, DMSO-d<sub>6</sub>): δ 156.20, 153.35, 133.83, 127.44, 120.27, 116.70, 109.29, 79.52, 55.81, 27.98. LCMS: *m/z*: 249 [M+H]<sup>+</sup>. HRMS (ESI-TOF) *m/z*: calcd for C<sub>13</sub>H<sub>17</sub>N<sub>2</sub>O<sub>3</sub> (M+H)<sup>+</sup> 249.1239, found 249.1233.

***tert*-Butyl (2-cyano-4-fluorophenyl)carbamate (1d):**

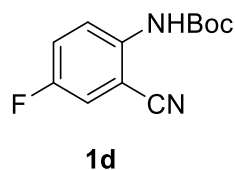

*tert*-Butyl (2-cyano-4-fluorophenyl)carbamate **1d** (1.05 g, 4.449 mmol, 88%) was synthesised from 2-bromo-5-fluorobenzonitrile (1 g, 5.000 mmol) by following the general procedure. Yellow solid; Melting point = 92 – 94 °C. <sup>1</sup>H NMR (400 MHz, DMSO-d<sub>6</sub>): δ 9.81 (s, 1H), 8.24 (d, *J* = 1.6 Hz, 1H), 7.99 (dd, *J* = 1.9, 8.8 Hz, 1H), 7.77 (d, *J* = 8.6 Hz, 1H), 1.49 (s, 9H). <sup>13</sup>C NMR (101 MHz, DMSO-d<sub>6</sub>): δ 152.37, 144.54, 130.56 (qd, *J*<sub>C,F</sub> = 3.6, 24.0 Hz, 1C), 130.44 (q, *J*<sub>C,F</sub> = 3.4 Hz, 1C), 124.70 (q, *J*<sub>C,F</sub> = 33.33 Hz, 1C), 127.28-119.17 (m, 1C), 124.35, 115.68, 106.52, 80.75, 27.84. <sup>19</sup>F NMR (376 MHz, DMSO-d<sub>6</sub>): δ -102.8. LCMS: *m/z*: 235 [M-H]<sup>+</sup>. HRMS (ESI-TOF) *m/z*: calcd for C<sub>12</sub>H<sub>12</sub>FN<sub>2</sub>O<sub>2</sub> (M-H)<sup>+</sup> 235.0883, found 235.0890.

***tert*-Butyl (4-chloro-2-cyanophenyl)carbamate (1e):**

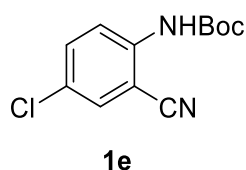

*tert*-Butyl (4-chloro-2-cyanophenyl)carbamate **1e** (284 mg, 1.127 mmol, 49%) was synthesised from 2-bromo-5-chlorobenzonitrile (500 mg, 2.314 mmol) by following the general procedure. White solid; Melting point = 119 –121 °C. <sup>1</sup>H NMR (400 MHz, DMSO-d<sub>6</sub>): δ 9.53 (s, 1H), 7.95 (d, *J* = 2.5 Hz, 1H), 7.71 (dd, *J* = 2.6, 8.8 Hz, 1H), 7.49 (d, *J* = 8.9 Hz, 1H), 1.47 (s, 9H). <sup>13</sup>C NMR (101 MHz, DMSO-d<sub>6</sub>): δ 152.71, 139.99, 133.73, 132.34, 128.63, 126.36, 115.69, 108.64, 80.26, 27.90. LCMS: *m/z*: 251 [M-H]<sup>+</sup>. HRMS (ESI-TOF) *m/z*: calcd for C<sub>12</sub>H<sub>12</sub>ClN<sub>2</sub>O<sub>2</sub> (M-H)<sup>+</sup> 251.0587, found 251.0592.

***tert*-Butyl (2-cyano-4-(trifluoromethyl)phenyl)carbamate (1f):**

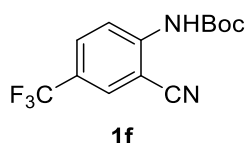

*tert*-Butyl (2-cyano-4-(trifluoromethyl)phenyl)carbamate **1f** (835 mg, 2.919 mmol, 73%) was synthesised from 2-bromo-5-(trifluoromethyl)benzonitrile (1 g, 4.000 mmol) by following the general procedure. Yellow solid; Melting point = 110 – 112 °C. <sup>1</sup>H NMR (400 MHz, DMSO-d<sub>6</sub>): δ 9.82 (s, 1H), 8.25 (d, *J* = 1.6 Hz, 1H), 8.00 (dd, *J* = 1.8, 8.8 Hz, 1H), 7.76 (d, *J* = 8.6 Hz, 1H), 1.49 (s, 9H). <sup>13</sup>C NMR (101 MHz, DMSO-d<sub>6</sub>): δ 152.38, 144.54, 130.72 (q, *J*<sub>C,F</sub> = 5.05 Hz, 1C), 130.47 (q, *J*<sub>C,F</sub> = 4.04 Hz, 1C), 124.80 (q, *J*<sub>C,F</sub> = 33.33 Hz, 1C), 124.40, 121.89, 115.69, 106.56, 80.77, 27.85. <sup>19</sup>F NMR (376 MHz, DMSO-d<sub>6</sub>): δ –60.9. LCMS: *m/z*: 287 [M+H]<sup>+</sup>. HRMS (ESI-TOF) *m/z*: calcd for C<sub>13</sub>H<sub>12</sub>F<sub>3</sub>N<sub>2</sub>O<sub>2</sub> (M-H)<sup>+</sup> 285.0851, found 285.0857.

***tert*-Butyl (2-cyano-5-methylphenyl)carbamate (1g):**

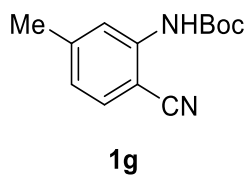

*tert*-Butyl (2-cyano-5-methylphenyl)carbamate **1g** (900 mg, 3.879 mmol, 76%) was synthesised from 2-bromo-4-methylbenzonitrile (1 g, 5.102 mmol) by following the general procedure. Off-white solid; Melting point = 113 – 115 °C. <sup>1</sup>H NMR (400 MHz, DMSO-d<sub>6</sub>): δ 9.32 (s, 1H), 7.63 (d, *J* = 8.0 Hz, 1H), 7.29 (s, 1H), 7.14 - 7.07 (m, 1H), 2.35 (s, 3H), 1.47 (s, 9H). <sup>13</sup>C NMR (101 MHz, DMSO-d<sub>6</sub>): δ 152.90, 144.29, 140.71, 132.85, 125.81, 125.28, 117.18, 104.51, 79.84, 27.94, 21.25. LCMS: *m/z*: 233 [M+H]<sup>+</sup>. HRMS (ESI-TOF) *m/z*: calcd for C<sub>13</sub>H<sub>17</sub>N<sub>2</sub>O<sub>2</sub> (M+H)<sup>+</sup> 233.1290, found 233.1284.

***tert*-Butyl (2-cyano-5-methoxyphenyl)carbamate (1h):**

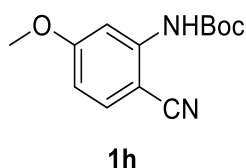

*tert*-Butyl (2-cyano-5-methoxyphenyl)carbamate **1h** (920 mg, 3.709 mmol, 78%) was synthesised from 2-bromo-4-methoxybenzotrile (1 g, 4.717 mmol) by following the general procedure. Off-white solid; Melting point = 117 – 119 °C. <sup>1</sup>H NMR (400 MHz, DMSO-d<sub>6</sub>): δ 9.20 (brs, 1H), 7.67 (d, *J* = 8.6 Hz, 1H), 7.06 (d, *J* = 2.4 Hz, 1H), 6.85 (dd, *J* = 2.5, 8.8 Hz, 1H), 3.81 (s, 3H), 1.47 (s, 9H). <sup>13</sup>C NMR (101 MHz, DMSO-d<sub>6</sub>): δ 162.91, 152.71, 142.70, 134.53, 117.26, 111.04, 109.76, 98.74, 79.98, 55.70, 27.93. LCMS: *m/z*: 247 [M-H]<sup>+</sup>. HRMS (ESI-TOF) *m/z*: calcd for C<sub>13</sub>H<sub>17</sub>N<sub>2</sub>O<sub>3</sub> (M+H)<sup>+</sup> 249.1239, found 249.1232.

***tert*-Butyl (2-cyano-5-fluorophenyl)carbamate (1i):**

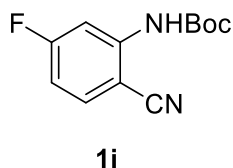

*tert*-Butyl (2-cyano-5-fluorophenyl)carbamate **1i** (405 mg, 1.176 mmol, 68%) was synthesised from 2-bromo-4-fluorobenzotrile (500 mg, 2.500 mmol) by following the general procedure. Off-white solid; Melting point = 92 – 94 °C. <sup>1</sup>H NMR (400 MHz, DMSO-d<sub>6</sub>): δ 9.59 (s, 1H), 7.86 (dd, *J* = 6.2, 8.7 Hz, 1H), 7.41 (dd, *J* = 2.6, 10.8 Hz, 1H), 7.15 (dt, *J* = 2.6, 8.4 Hz, 1H), 1.48 (s, 9H). <sup>13</sup>C NMR (101 MHz, DMSO-d<sub>6</sub>): δ 164.45 (d, *J*<sub>C,F</sub> = 251 Hz, 1C), 152.53, 143.50 (d, *J*<sub>C,F</sub> = 12.36 Hz, 1C), 135.67 (d, *J*<sub>C,F</sub> = 10.90 Hz, 1C), 116.26, 112.25 (d, *J*<sub>C,F</sub> = 22.53 Hz, 1C), 111.19 (d, *J*<sub>C,F</sub> = 26.16 Hz, 1C), 102.73 (d, *J*<sub>C,F</sub> = 2.90 Hz, 1C), 80.47, 27.87. <sup>19</sup>F NMR (376 MHz, DMSO-d<sub>6</sub>): δ -102.8. LCMS: *m/z*: 235 [M-H]<sup>+</sup>. HRMS (ESI-TOF) *m/z*: calcd for C<sub>12</sub>H<sub>12</sub>FN<sub>2</sub>O<sub>2</sub> (M-H)<sup>+</sup> 235.0883, found 235.0888.

***tert*-Butyl (5-chloro-2-cyanophenyl)carbamate (1j):**

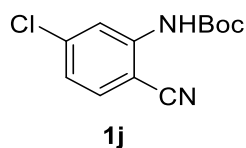

*tert*-butyl (5-chloro-2-cyanophenyl)carbamate **1j** (521 mg, 2.067 mmol, 89%) was synthesised from 2-bromo-4-chlorobenzotrile (500 mg, 2.315 mmol) by following the

general procedure. White solid; Melting point = 97 – 99 °C. <sup>1</sup>H NMR (400 MHz, DMSO-d<sub>6</sub>): δ 9.61 (s, 1H), 7.81 (d, *J* = 8.5 Hz, 1H), 7.61 (d, *J* = 2.0 Hz, 1H), 7.37 (dd, *J* = 2.1, 8.4 Hz, 1H), 1.48 (s, 9H). <sup>13</sup>C NMR (101 MHz, DMSO-d<sub>6</sub>): δ 152.57, 142.27, 138.17, 134.72, 124.89, 124.03, 116.20, 105.45, 80.51, 27.88. LCMS: *m/z*: 251 [M-H]<sup>+</sup>. HRMS (ESI-TOF) *m/z*: calcd for C<sub>12</sub>H<sub>12</sub>ClN<sub>2</sub>O<sub>2</sub> (M-H)<sup>+</sup> 251.0587, found 251.0593.

***tert*-Butyl (2-cyano-5-(trifluoromethyl)phenyl)carbamate (1k):**

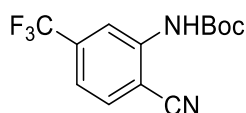

**1k**

*tert*-butyl (2-cyano-5-(trifluoromethyl)phenyl)carbamate **1k** (521 mg, 1.821 mmol, 91%) was synthesised from 2-bromo-4-(trifluoromethyl)benzotrile (500 mg, 2.000 mmol) by following the general procedure. Pale brown solid; Melting point = 91 – 93 °C. <sup>1</sup>H NMR (400 MHz, DMSO-d<sub>6</sub>): δ 9.77 (s, 1H), 8.03 (d, *J* = 8.1 Hz, 1H), 7.88 (s, 1H), 7.64 (dd, *J* = 1.1, 8.1 Hz, 1H), 1.49 (s, 9H). <sup>13</sup>C NMR (DMSO-d<sub>6</sub>, 101 MHz) δ 152.6, 141.8, 134.72, 133.21 (q, *J*<sub>C,F</sub> = 32.32 Hz, 1C), 123.07 (q, *J*<sub>C,F</sub> = 272.7 Hz, 1C), 121.08 (q, *J*<sub>C,F</sub> = 5.05 Hz, 1C), 120.59 (q, *J*<sub>C,F</sub> = 3.03, 4.04 Hz, 1C), 115.81, 110.22, 80.71, 27.88. <sup>19</sup>F NMR (376 MHz, DMSO-d<sub>6</sub>): δ –62.2. LCMS: *m/z*: 285 [M-H]<sup>+</sup>. HRMS (ESI-TOF) *m/z*: calcd for C<sub>13</sub>H<sub>12</sub>F<sub>3</sub>N<sub>2</sub>O<sub>2</sub> (M-H)<sup>+</sup> 285.0851, found 285.0857.

***tert*-Butyl (2-cyano-3-methylphenyl)carbamate (1l):**

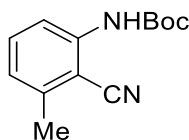

**1l**

*tert*-butyl (2-cyano-3-methylphenyl)carbamate **1l** (495 mg, 2.133 mmol, 83%) was synthesised from 2-bromo-6-methylbenzotrile (500 mg, 2.551 mmol) by following the general procedure. Yellow solid; Melting point = 83 – 85 °C. <sup>1</sup>H NMR (400 MHz, DMSO-d<sub>6</sub>): δ 9.31 (s, 1H), 7.54 - 7.47 (m, 1H), 7.28 (d, *J* = 8.1 Hz, 1H), 7.20 (d, *J* = 7.6 Hz, 1H), 2.45 (s, 3H), 1.47 (s, 9H). <sup>13</sup>C NMR (101 MHz, DMSO-d<sub>6</sub>): δ 152.97, 142.18, 141.13, 132.90, 125.98, 122.28, 115.91, 108.23, 79.79, 27.96, 20.21. LCMS: *m/z*: 233 [M+H]<sup>+</sup>. HRMS (ESI-TOF) *m/z*: calcd for C<sub>13</sub>H<sub>17</sub>N<sub>2</sub>O<sub>2</sub> (M+H)<sup>+</sup> 233.1290, found 233.1284.

***tert*-Butyl (2-cyano-4,5-dimethoxyphenyl)carbamate (1m):**

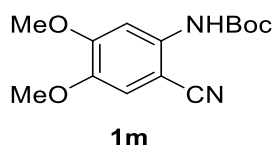

*tert*-butyl (2-cyano-4,5-dimethoxyphenyl)carbamate **1m** (405 mg, 1.457 mmol, 70%) was synthesised from 2-bromo-4,5-dimethoxybenzotrile (500 mg, 2.066 mmol) by following the general procedure. Yellow solid; Melting point = 131 – 133 °C. <sup>1</sup>H NMR (400 MHz, DMSO-d<sub>6</sub>): δ 9.14 (s, 1H), 7.27 (s, 1H), 7.01 (s, 1H), 3.80 (s, 3H), 3.78 (s, 3H), 1.46 (s, 9H). <sup>13</sup>C NMR (101 MHz, DMSO-d<sub>6</sub>): δ 153.10, 152.58, 145.97, 135.80, 117.33, 114.19, 108.98, 98.79, 79.59, 56.04, 55.80, 28.01. LCMS: *m/z*: 277 [M-H]<sup>+</sup>. HRMS (ESI-TOF) *m/z*: calcd for C<sub>14</sub>H<sub>19</sub>N<sub>2</sub>O<sub>4</sub> (M+H)<sup>+</sup> 279.1345, found 279.1339.

***tert*-Butyl (2-cyanophenyl)(methyl)carbamate (1n):**

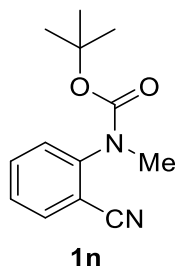

To a stirred solution of *tert*-butyl (2-cyanophenyl)carbamate (500 mg, 2.291 mmol) in THF (10 mL) was added sodium hydride (92 mg, 2.291 mmol) at 0 °C under N<sub>2</sub> atmosphere. Iodomethane (0.143 mL, 2.291 mmol) was added at 0 °C and the reaction mixture was stirred for 16 h. The reaction was monitored by TLC and UPLC. After completion of starting material, the reaction mixture was quenched with ice water and extracted with EtOAc (2 x 50 mL). Combined organic layers were dried over Na<sub>2</sub>SO<sub>4</sub>, filtered, and concentrated in *vacuo* yield crude residue which was purified by silica gel column chromatography (20% EtOAc/hexanes) obtained *tert*-butyl (2-cyanophenyl)(methyl)carbamate **1n** (450 mg, 1.926 mmol, 84% yield) as a colourless oil. <sup>1</sup>H NMR (400 MHz, CDCl<sub>3</sub>): δ 7.66 (dd, *J* = 1.4, 8.0 Hz, 1H), 7.60 (dt, *J* = 1.6, 7.8 Hz, 1H), 7.37 - 7.29 (m, 2H), 3.29 (s, 3H), 1.44 (s, 9H). <sup>13</sup>C NMR (101 MHz, CDCl<sub>3</sub>): δ 153.78, 146.59, 133.48, 133.19, 127.75, 126.88, 116.74, 112.35, 81.42, 37.33, 28.07. LCMS: *m/z*: 177 [M-56+H]<sup>+</sup>. HRMS (ESI-TOF) *m/z*: calcd for C<sub>13</sub>H<sub>17</sub>N<sub>2</sub>O<sub>2</sub> (M+H)<sup>+</sup> 233.1290, found 233.1284.

***tert*-Butyl (3-cyanopyridin-2-yl)carbamate (1o):**

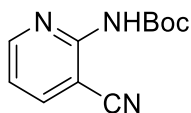

**1o**

*tert*-butyl (3-cyanopyridin-2-yl)carbamate **1o** (775 mg, 3.539 mmol, 65%) was synthesised from 2-bromonicotinonitrile (1 g, 5.464 mmol) by following the general procedure. Pale green solid; Melting point = 159 – 161 °C. <sup>1</sup>H NMR (400 MHz, DMSO-*d*<sub>6</sub>): δ 10.09 (s, 1H), 8.62 (dd, *J* = 1.9, 4.9 Hz, 1H), 8.29 (dd, *J* = 1.9, 7.8 Hz, 1H), 7.37 (dd, *J* = 4.9, 7.8 Hz, 1H), 1.47 (s, 9H). <sup>13</sup>C NMR (101 MHz, DMSO-*d*<sub>6</sub>): δ 152.66, 152.52, 152.24, 142.68, 120.41, 115.87, 104.23, 80.45, 27.86. LCMS: *m/z*: 218 [M-H]<sup>+</sup>. HRMS (ESI-TOF) *m/z*: calcd for C<sub>13</sub>H<sub>17</sub>N<sub>2</sub>O<sub>2</sub> (M-56+H)<sup>+</sup> 164.0460, found 164.0454.

***tert*-Butyl (5-bromo-3-cyanopyridin-2-yl)carbamate (1p):**

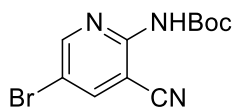

**1p**

*tert*-butyl (3-cyanopyridin-2-yl)carbamate **1p** (308 mg, 1.033 mmol, 41%) was synthesised from 2-amino-5-bromonicotinonitrile (500 mg, 2.525 mmol) by following the procedure for **1q**. White solid; Melting point = 104 – 106 °C. <sup>1</sup>H NMR (400 MHz, DMSO-*d*<sub>6</sub>): δ 10.25 (s, 1H), 8.76 (d, *J* = 2.5 Hz, 1H), 8.65 (d, *J* = 2.4 Hz, 1H), 1.47 (s, 9H). <sup>13</sup>C NMR (101 MHz, DMSO-*d*<sub>6</sub>): δ 153.08, 152.23, 151.67, 144.44, 114.60, 114.57, 105.39, 80.79, 27.81. LCMS: *m/z*: 296 [M-H]<sup>+</sup>. HRMS (ESI-TOF) *m/z*: calcd for C<sub>11</sub>H<sub>11</sub>BrN<sub>3</sub>O<sub>2</sub> (M-H)<sup>+</sup> 296.0035, found 296.0040.

***tert*-Butyl (3-cyanothiophen-2-yl)carbamate (1q):**

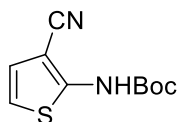

**1q**

To a stirred solution of 2-aminothiophene-3-carbonitrile (500 mg, 4.03 mmol) in THF (8 mL) were added Et<sub>3</sub>N (1.4 mL, 10.07 mmol), DMAP (98 mg, 0.80 mmol) and Boc<sub>2</sub>O (1.32 g, 6.04 mmol) under N<sub>2</sub> atmosphere. The reaction mixture was stirred at room temperature for 16 h. After completion of starting material, the reaction mixture was quenched with water and extracted with EtOAc (2x50 mL). The combined organic layers were dried over Na<sub>2</sub>SO<sub>4</sub>,



filtered, and concentrated in *vacuo* afforded crude residue. The crude residue was purified by Silica gel column chromatography to afford *tert*-Butyl (3-cyanothiophen-2-yl)carbamate **1q** (550 mg, 2.45 mmol, 61%) as an off-white solid. Melting point = 92 – 94 °C. <sup>1</sup>H NMR (400 MHz, DMSO-d<sub>6</sub>): δ 10.97 (brs, 1H), 7.15 - 7.06 (m, 2H), 1.48 (s, 9H). <sup>13</sup>C NMR (126 MHz, DMSO-d<sub>6</sub>): δ 152.56, 151.25, 125.27, 118.45, 114.56, 92.87, 81.26, 27.79. LCMS: m/z: 223 [M-H]<sup>+</sup>. HRMS (ESI-TOF) m/z: calcd for C<sub>10</sub>H<sub>11</sub>N<sub>2</sub>O<sub>2</sub>S (M-H)<sup>+</sup> 223.0541, found 223.0545.

***tert*-Butyl (3-carbamoylthiophen-2-yl)carbamate (3q):**

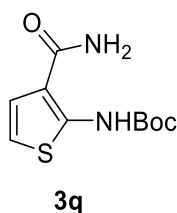

*tert*-Butyl (3-carbamoylthiophen-2-yl)carbamate **3q** (180 mg, 0.74 mmol) was obtained from *tert*-butyl (3-cyanothiophen-2-yl)carbamate **1q** (224 mg, 1 mmol) by following the general procedure. Yield: 74%; Off-white solid. Melting point = 137 – 139 °C. <sup>1</sup>H NMR (400 MHz, DMSO-d<sub>6</sub>): δ 11.30 (brs, 1H), 7.85 (brs, 1H), 7.50 (brs, 1H), 7.36 (d, *J* = 5.9 Hz, 1H), 6.91 (d, *J* = 5.8 Hz, 1H), 1.49 (s, 10H). <sup>13</sup>C NMR (101 MHz, DMSO-d<sub>6</sub>): δ 166.97, 151.47, 147.67, 123.44, 114.88, 113.67, 81.31, 27.81. LCMS: m/z: 241 [M-H]<sup>+</sup>. HRMS (ESI-TOF) m/z: calcd for C<sub>10</sub>H<sub>13</sub>N<sub>2</sub>O<sub>3</sub>S (M-H)<sup>+</sup> 241.0647, found 241.0652.

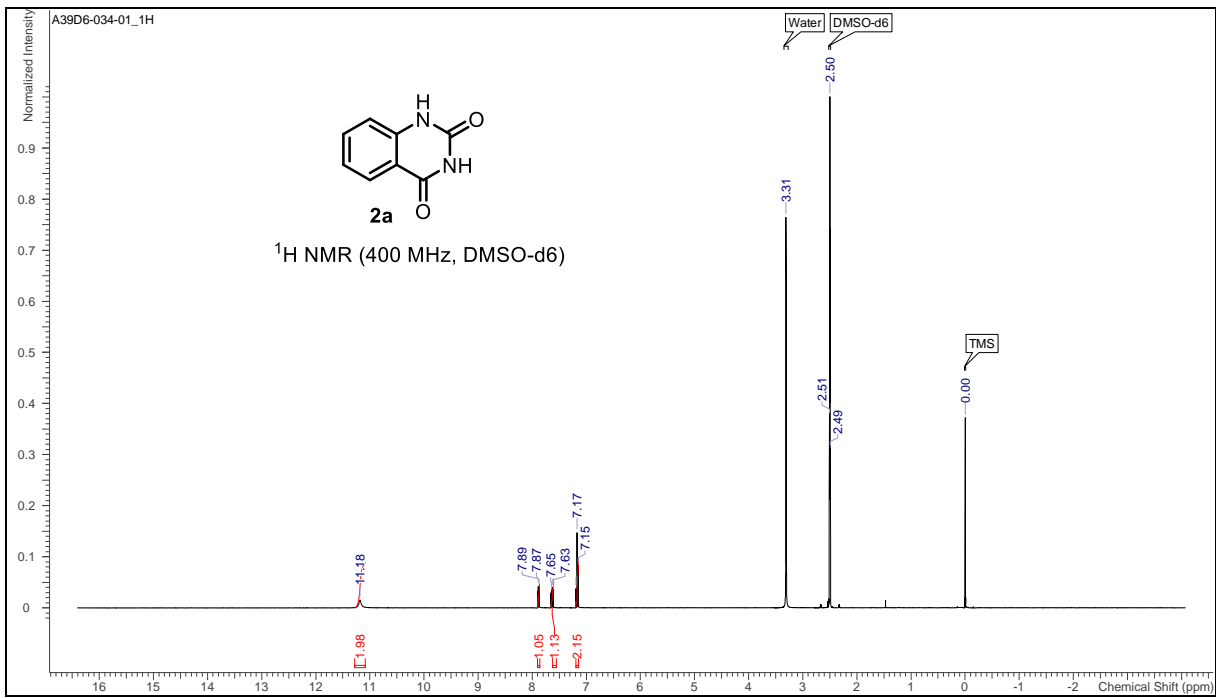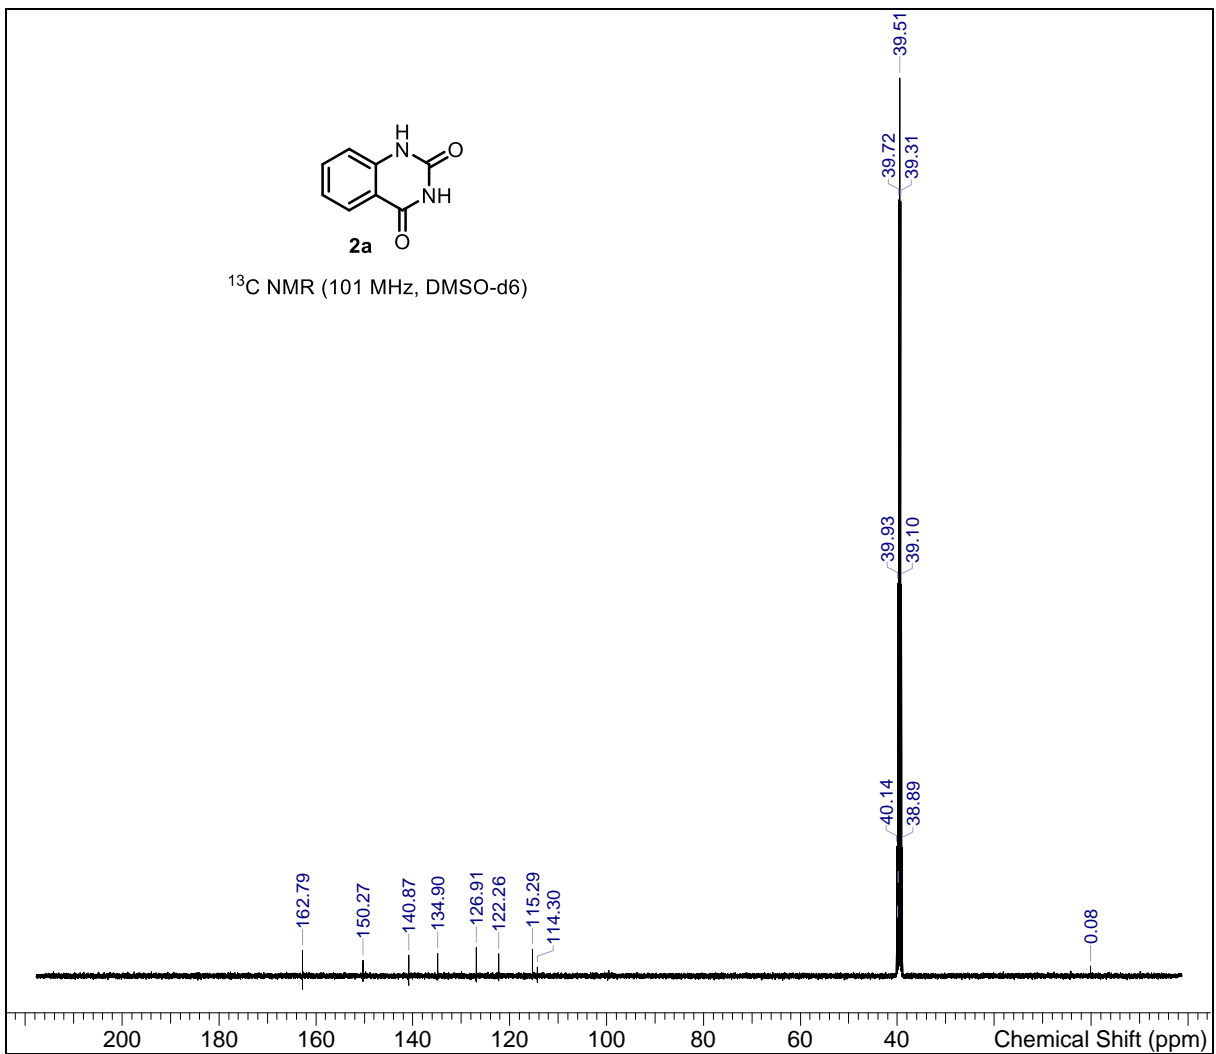

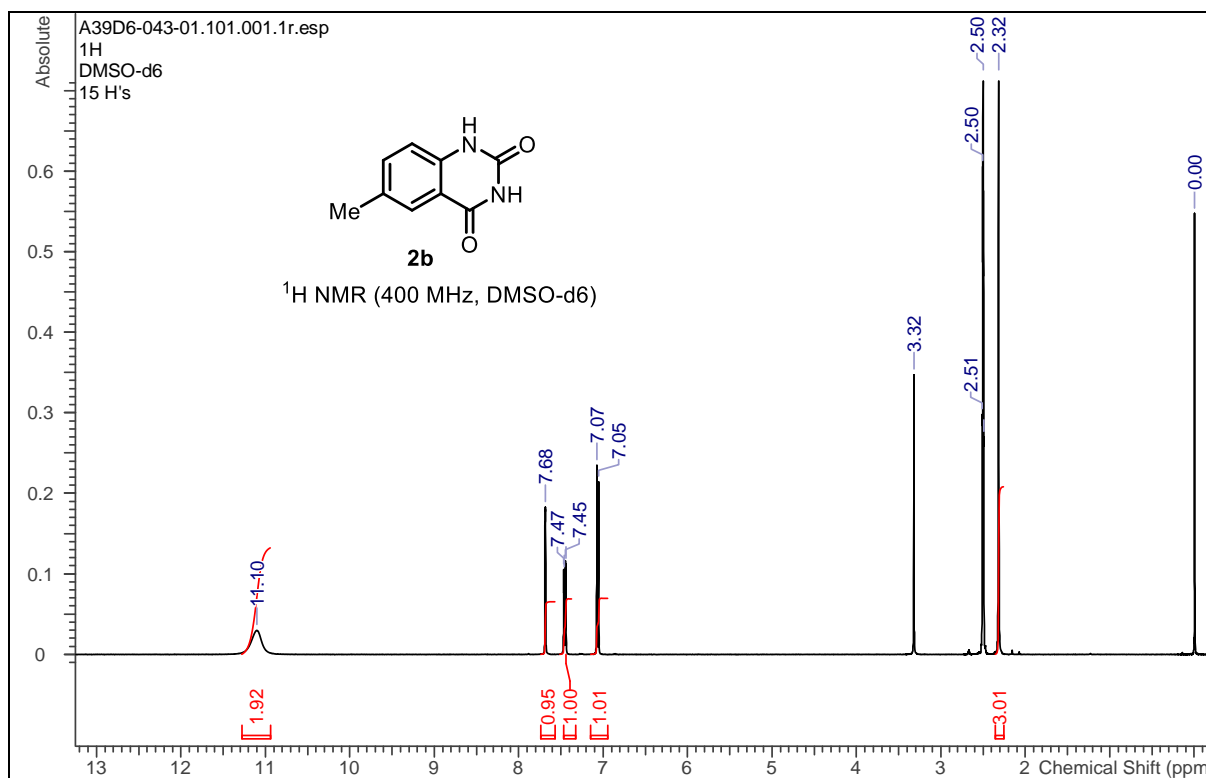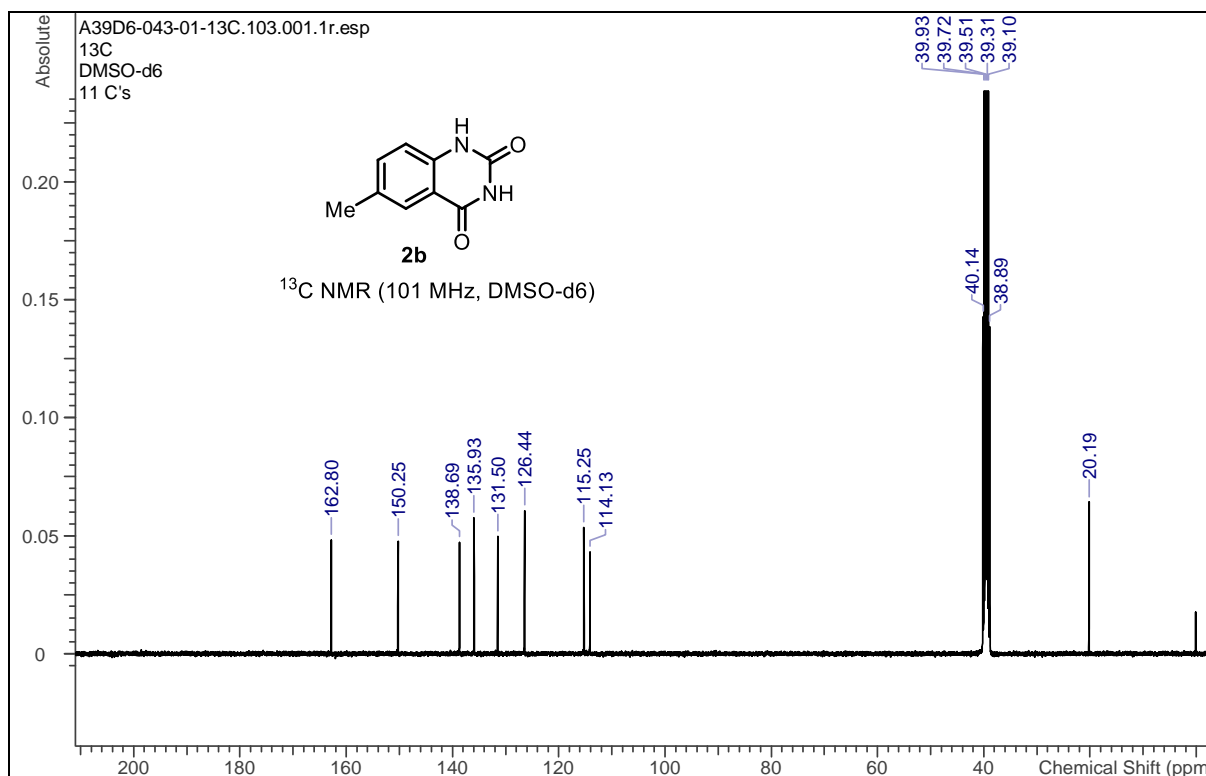

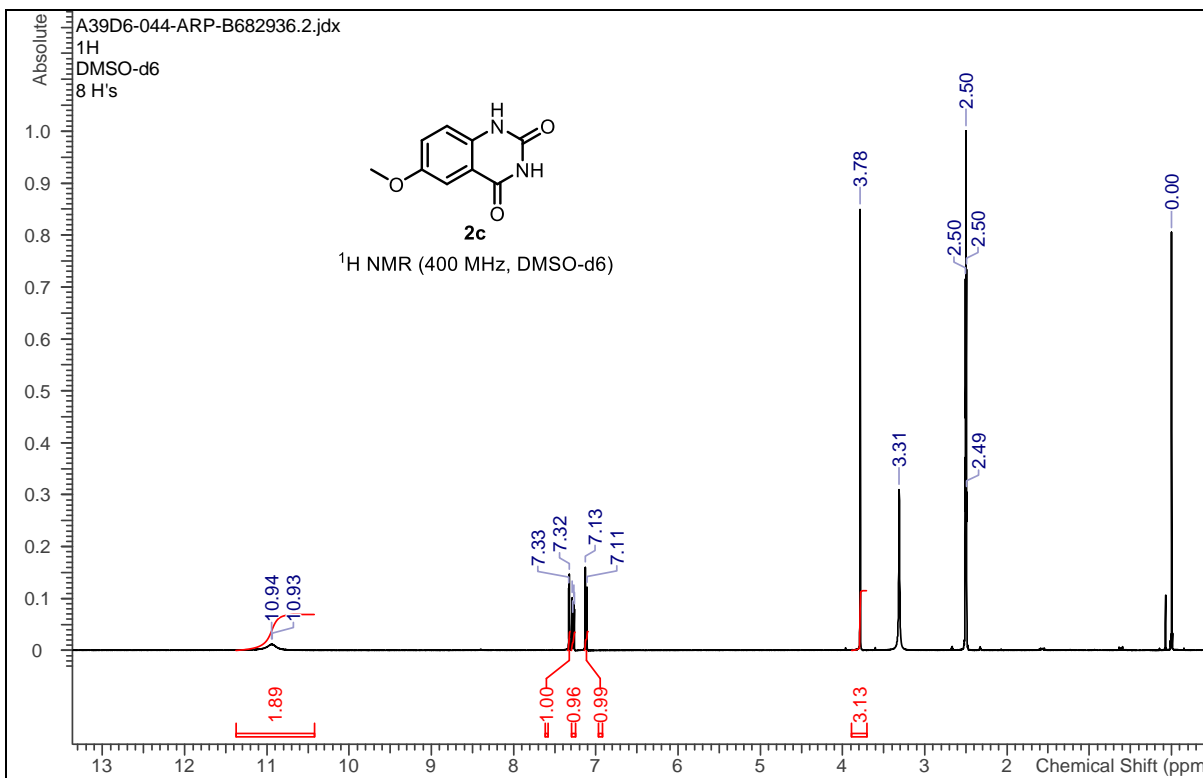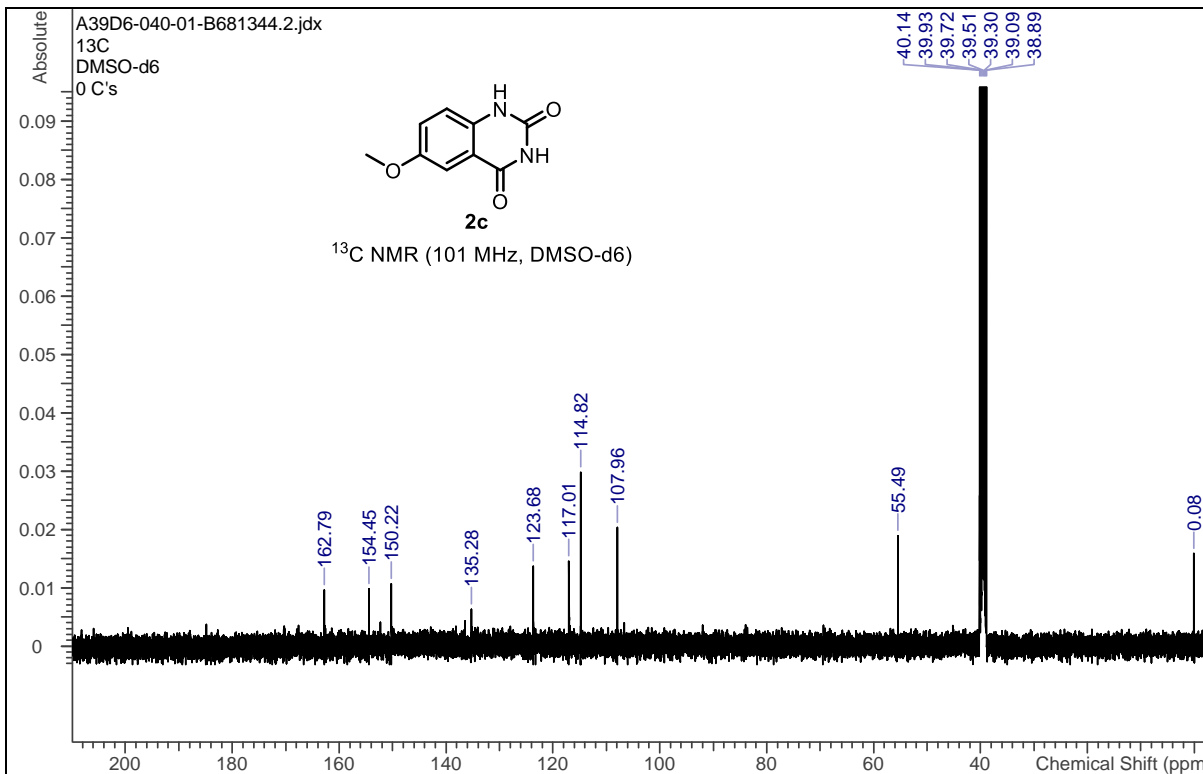

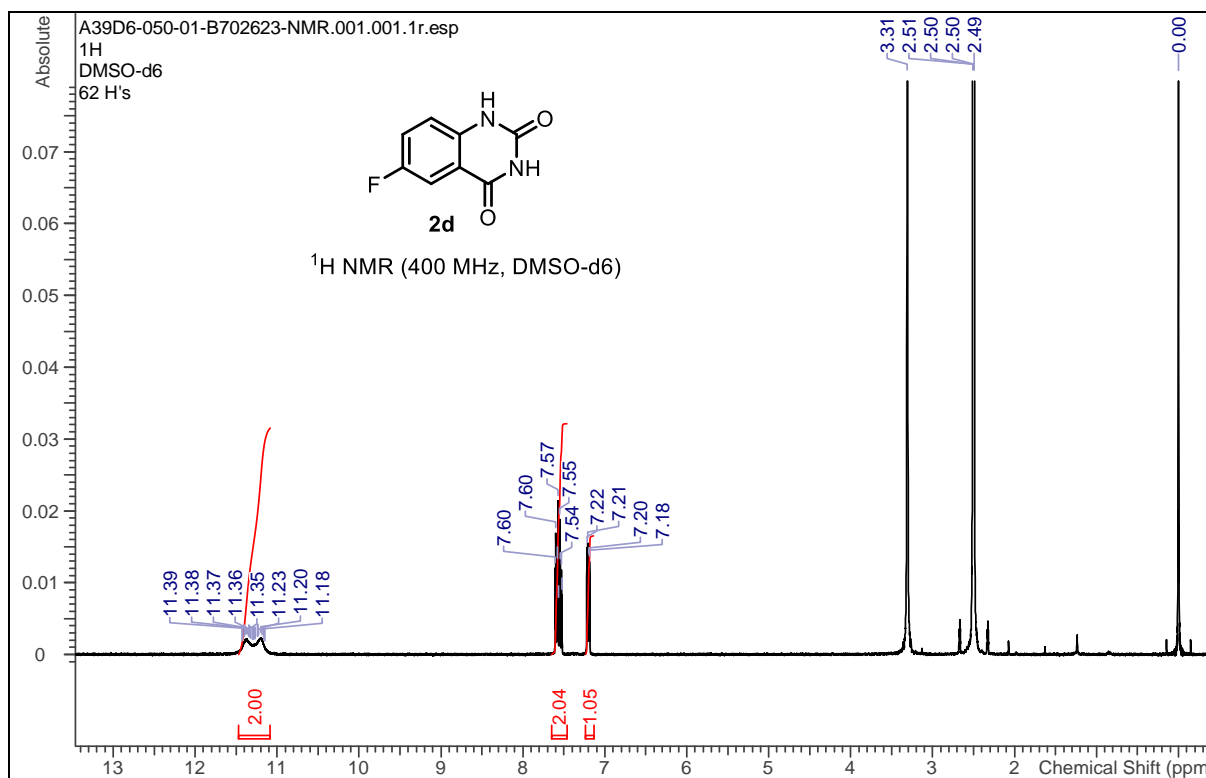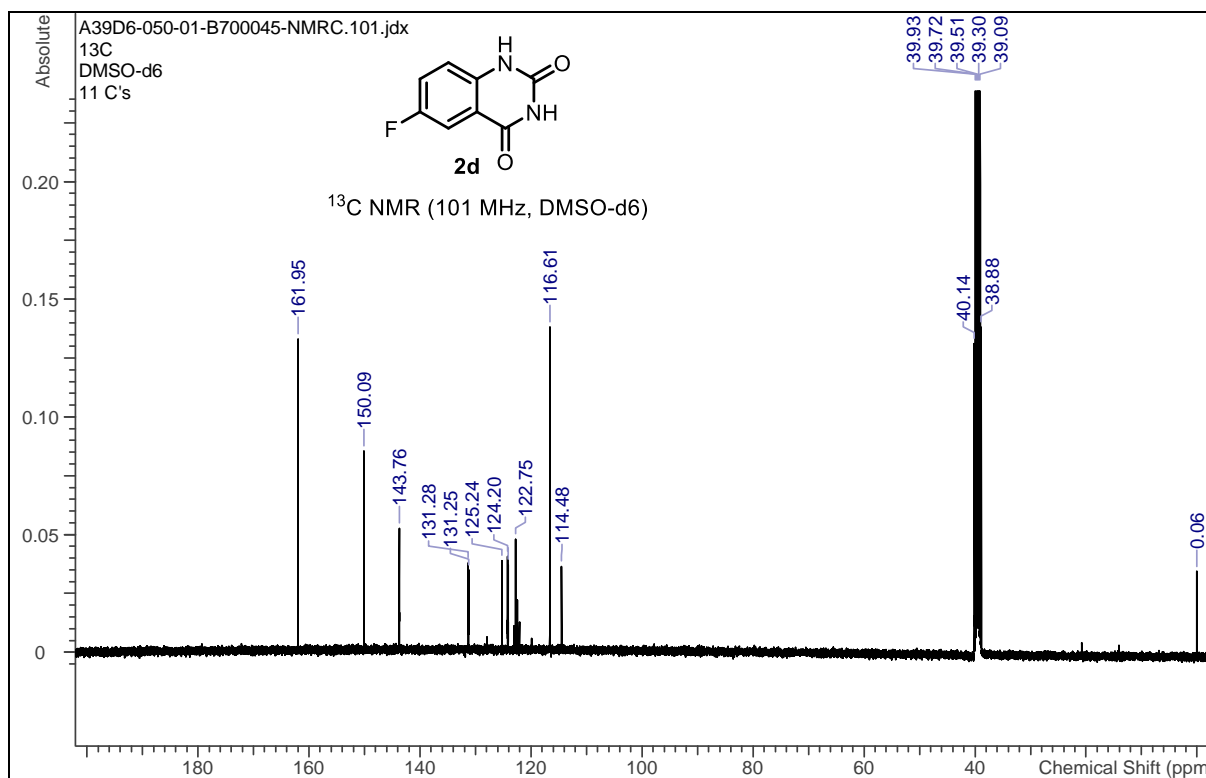

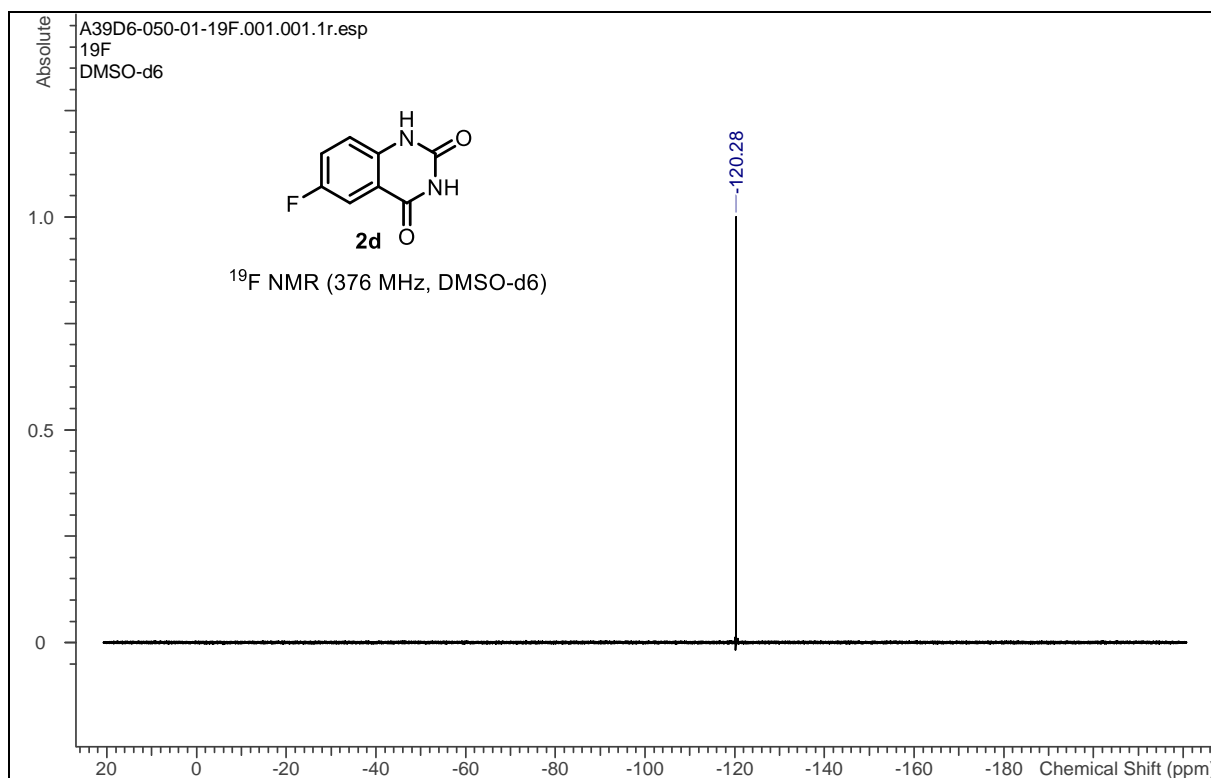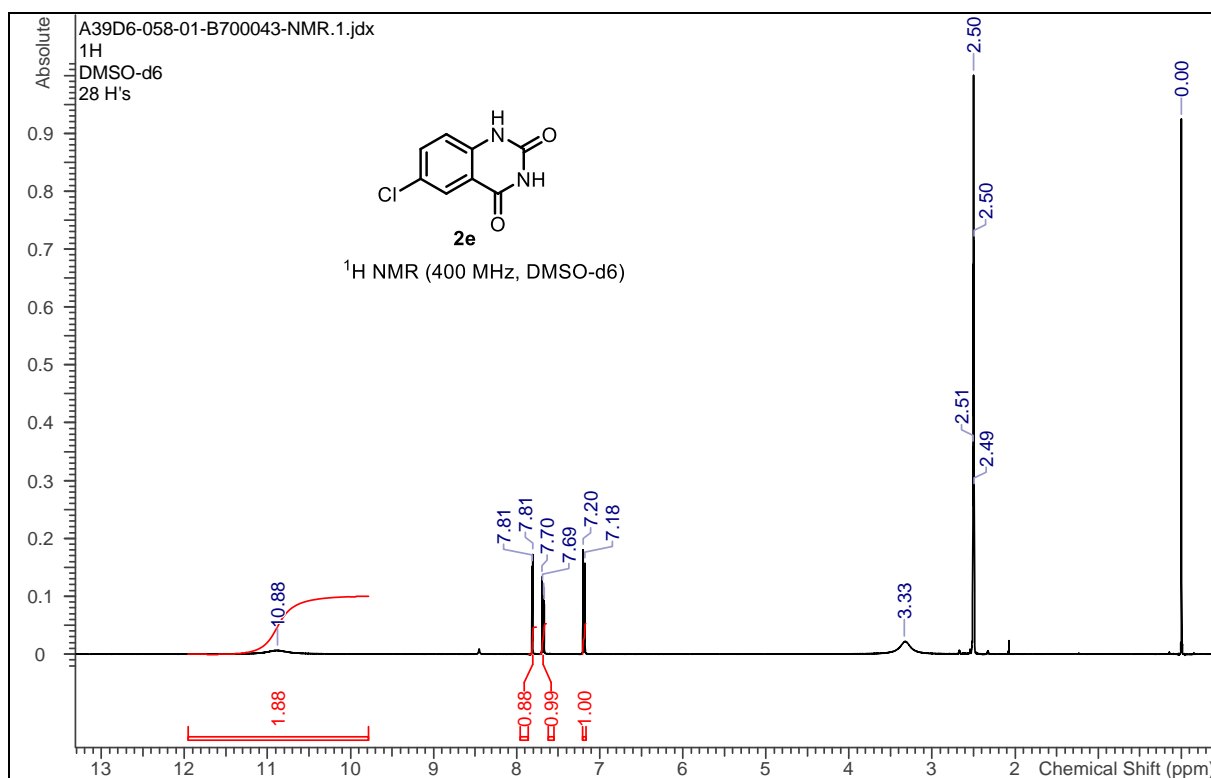

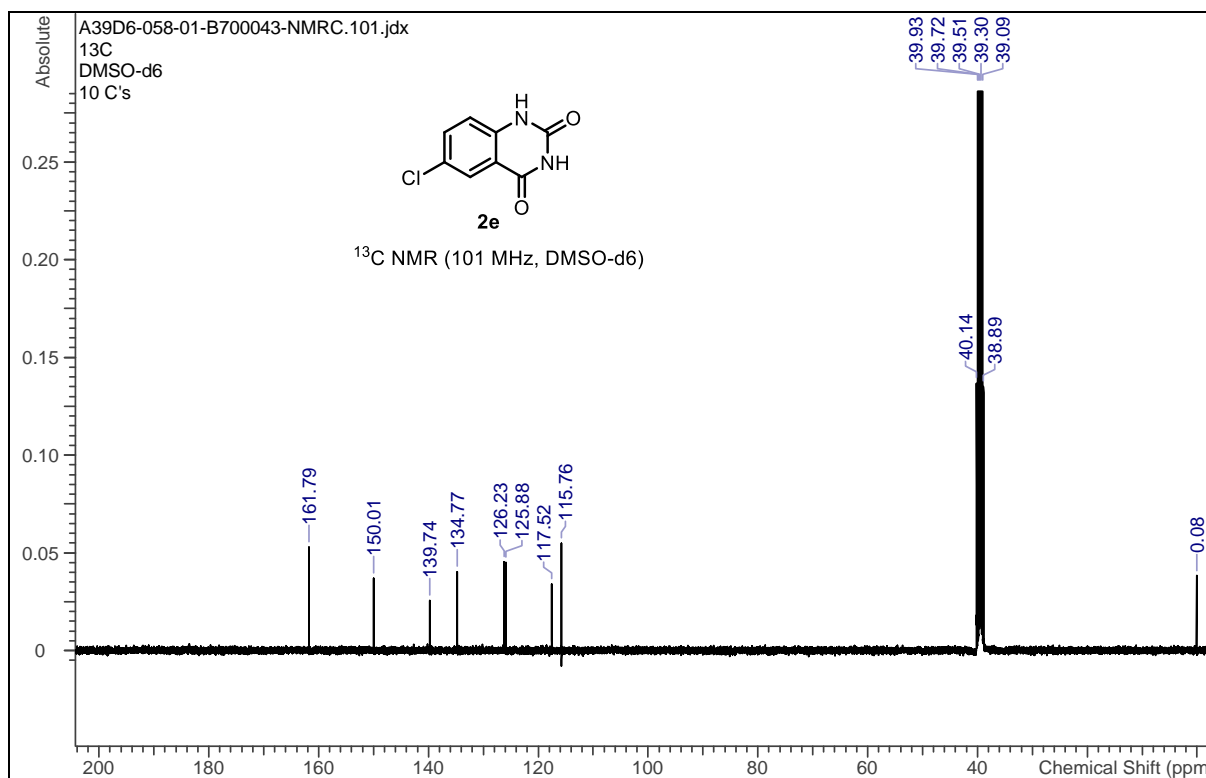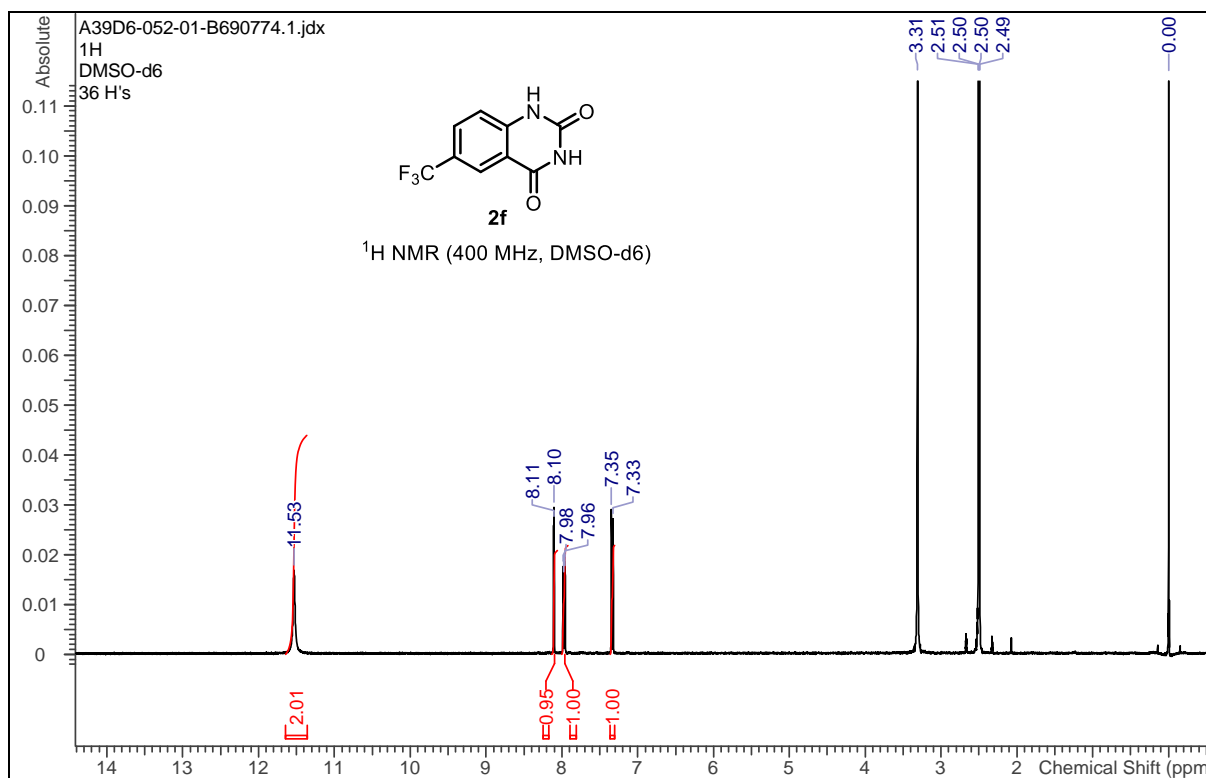

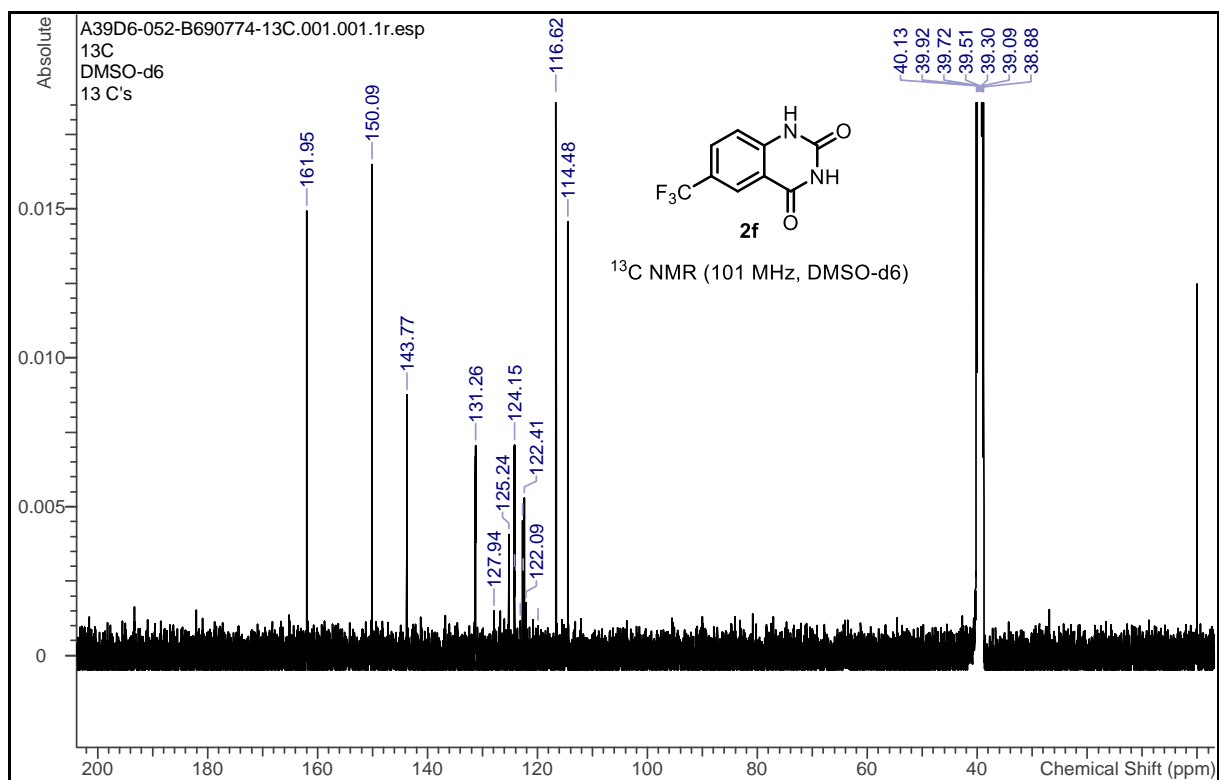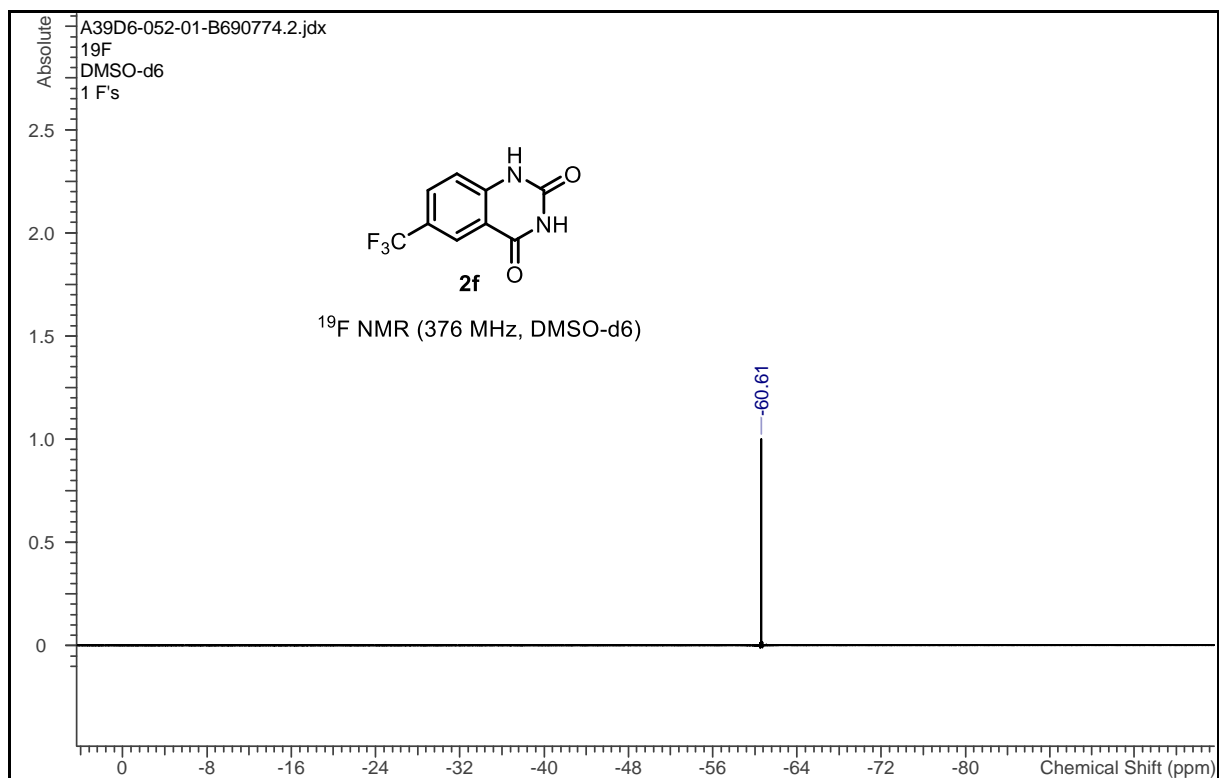



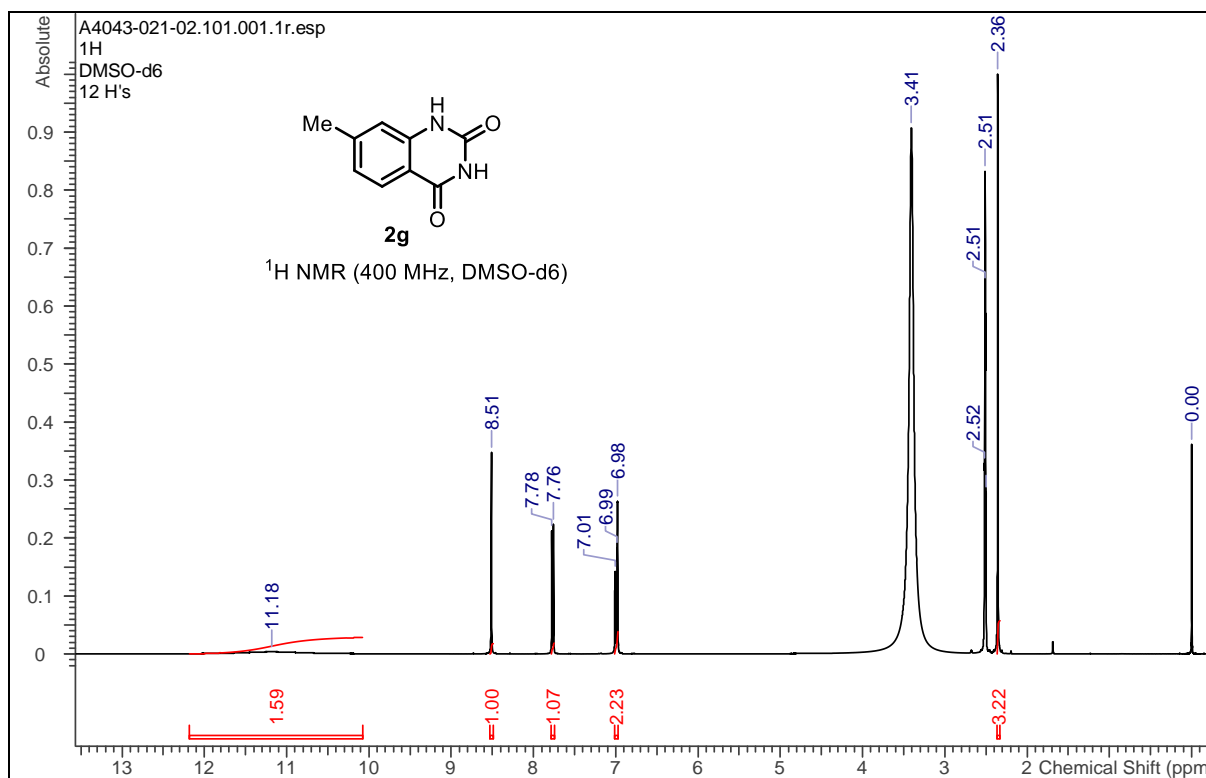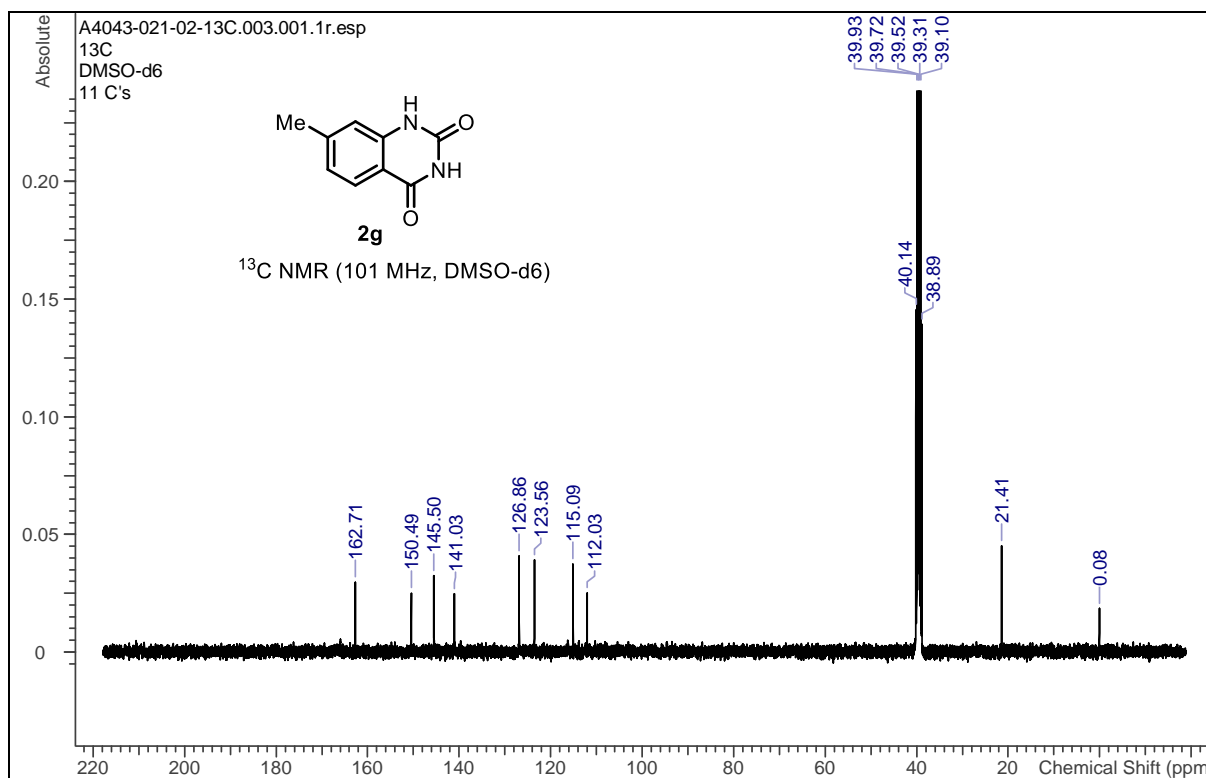

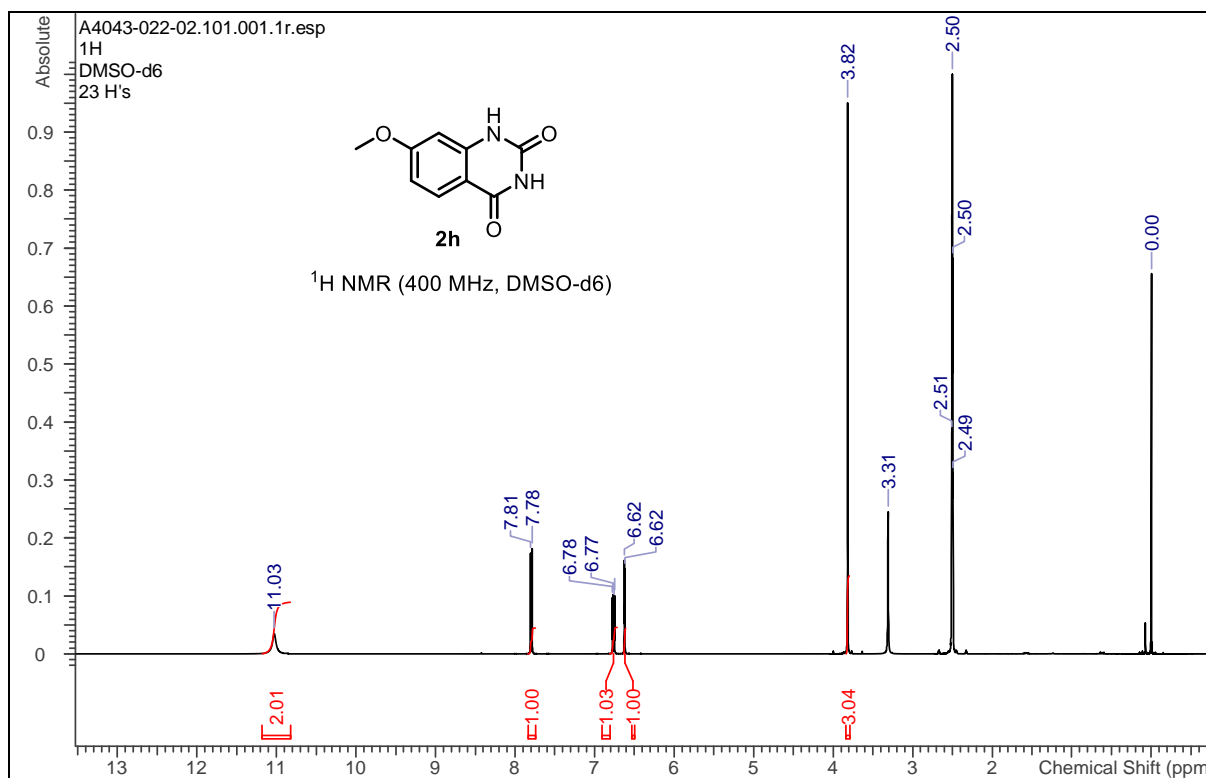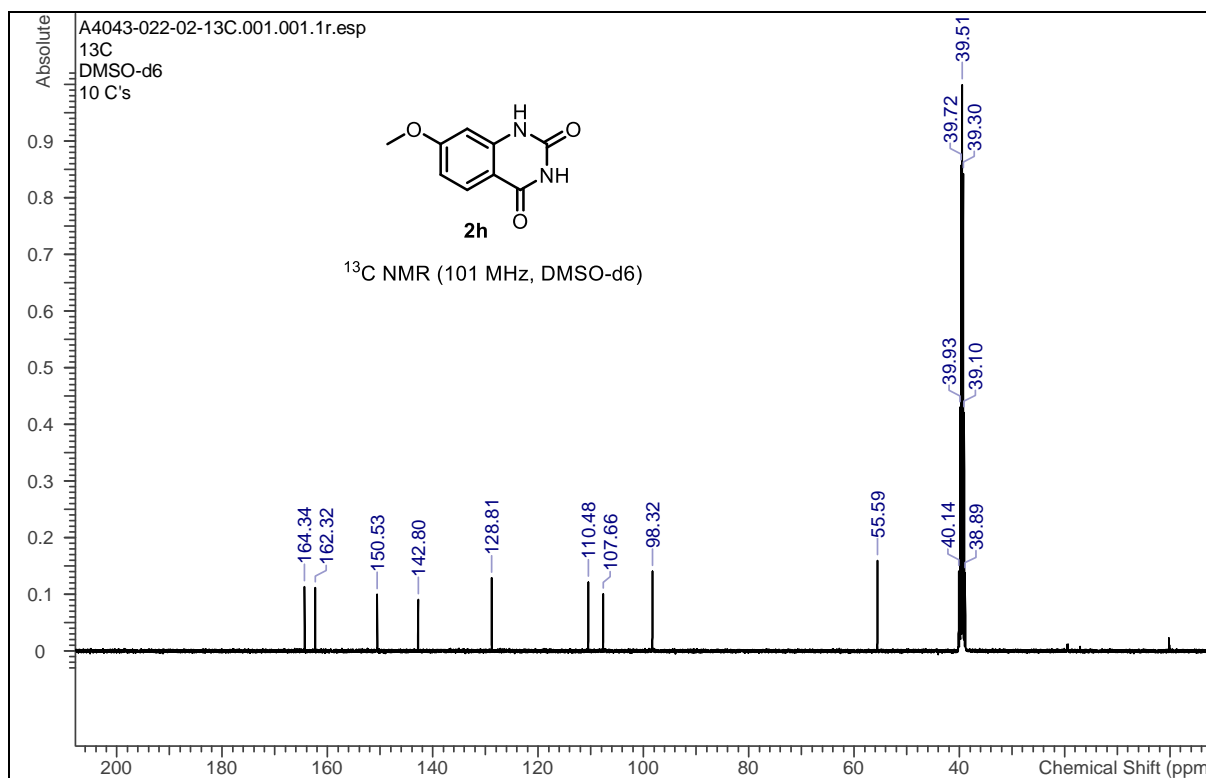

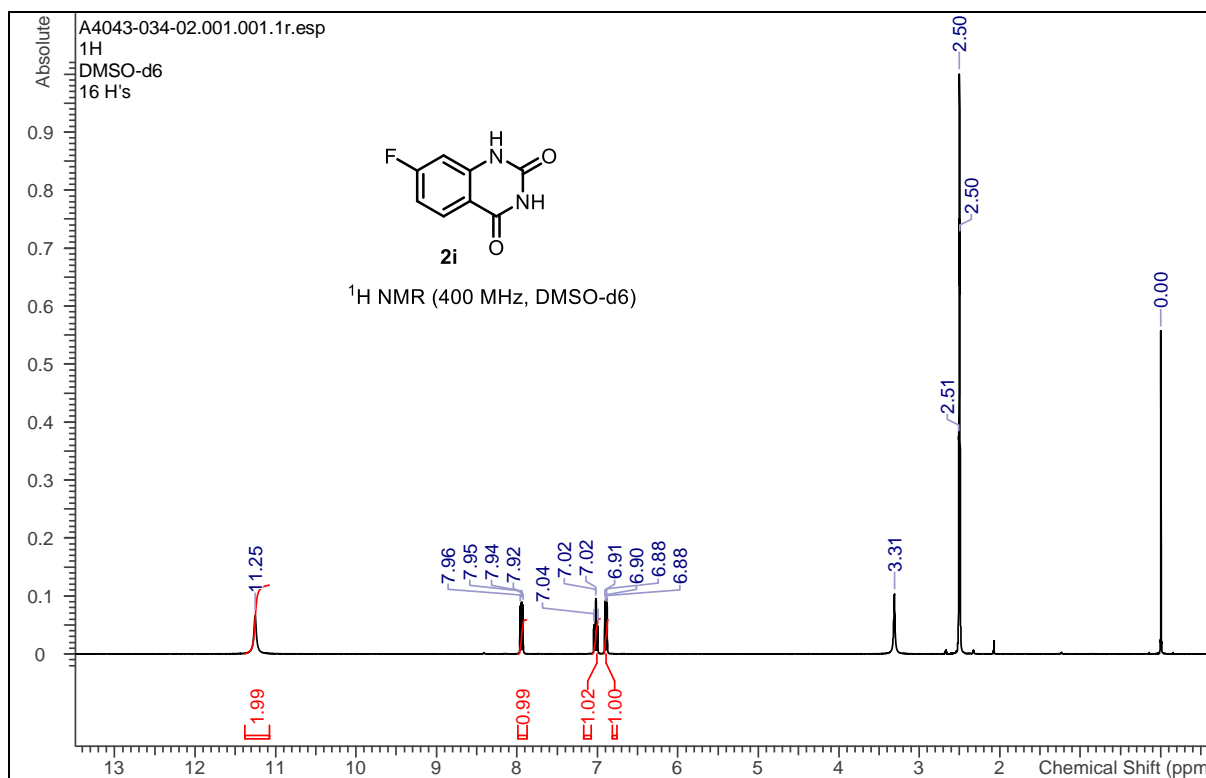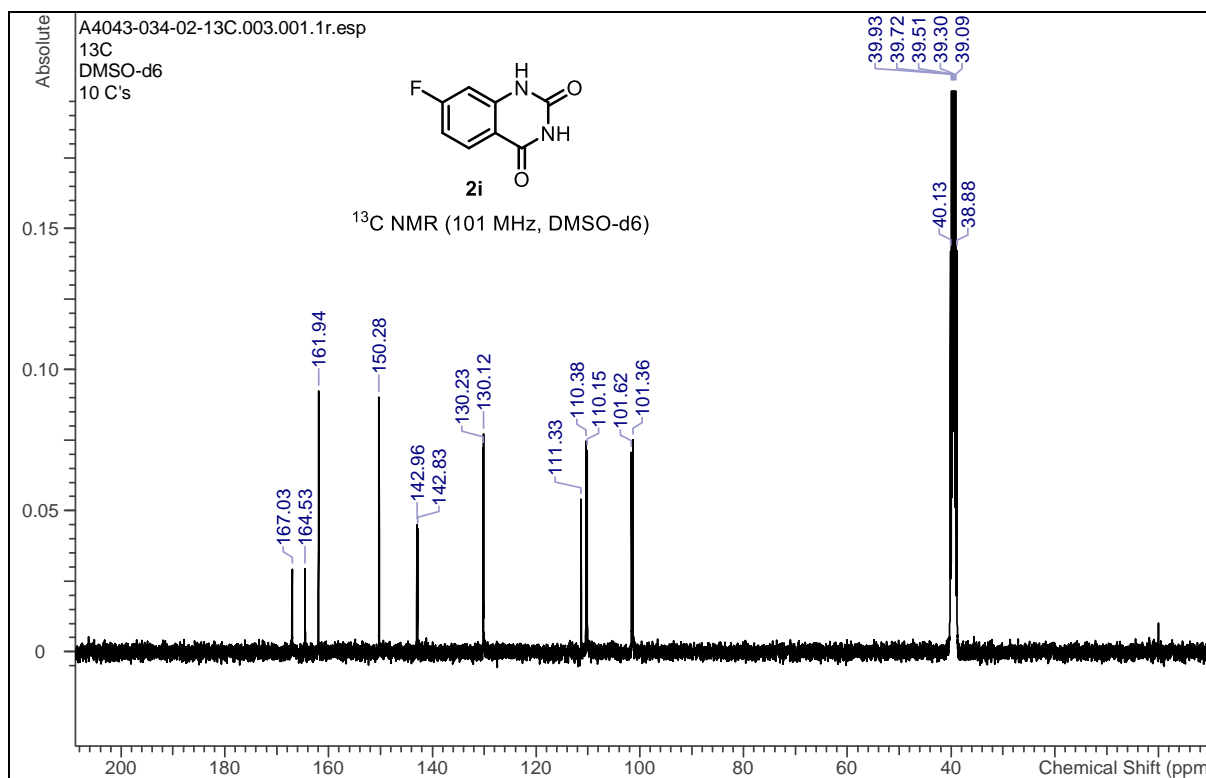

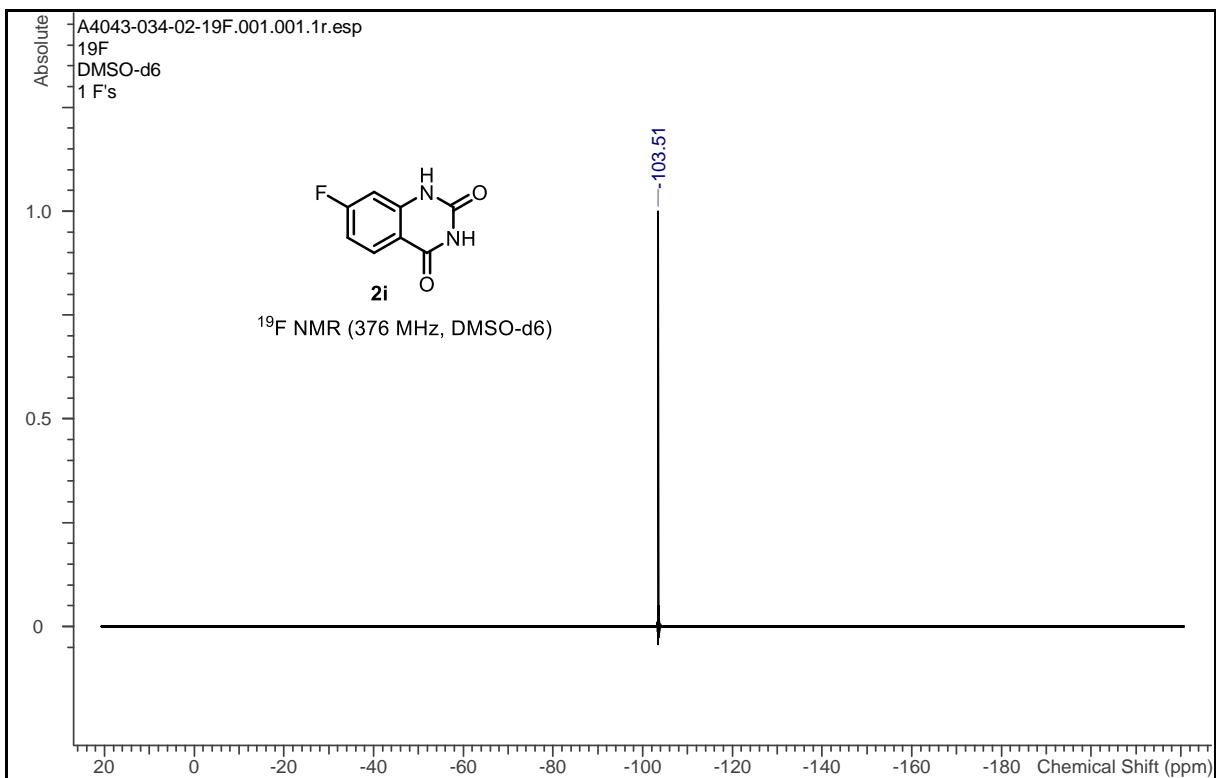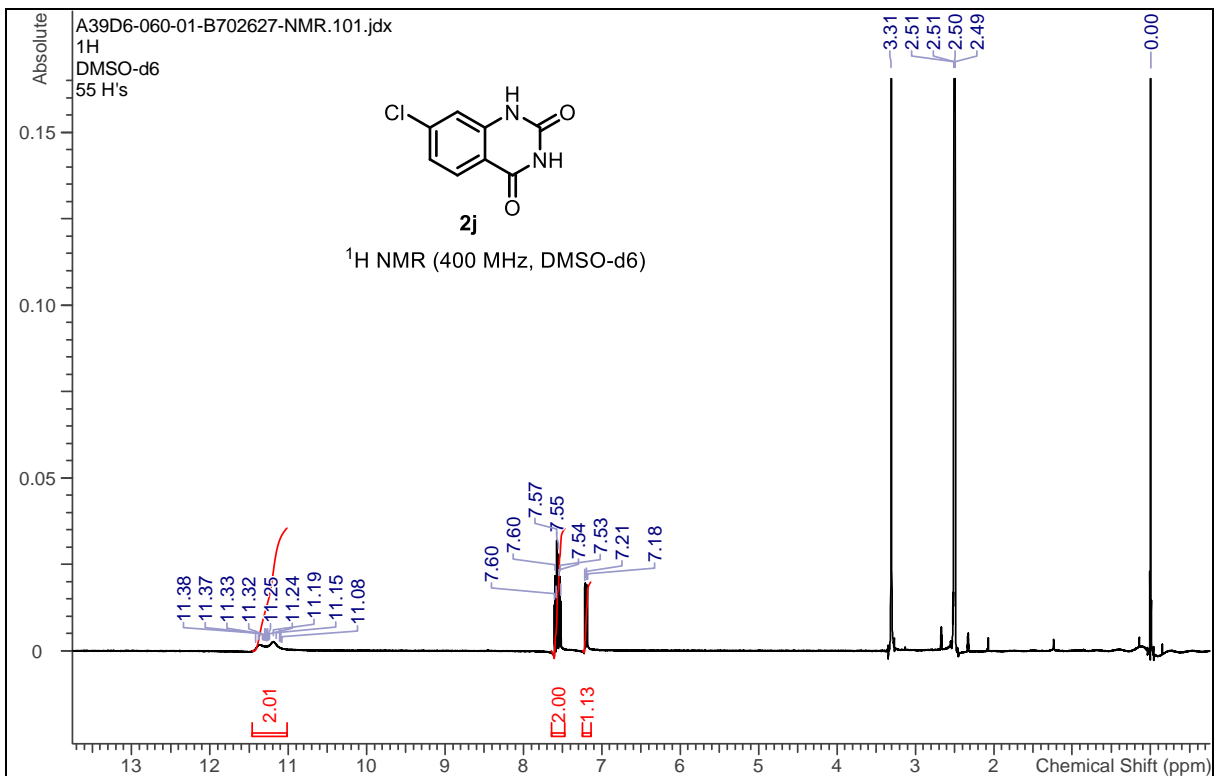

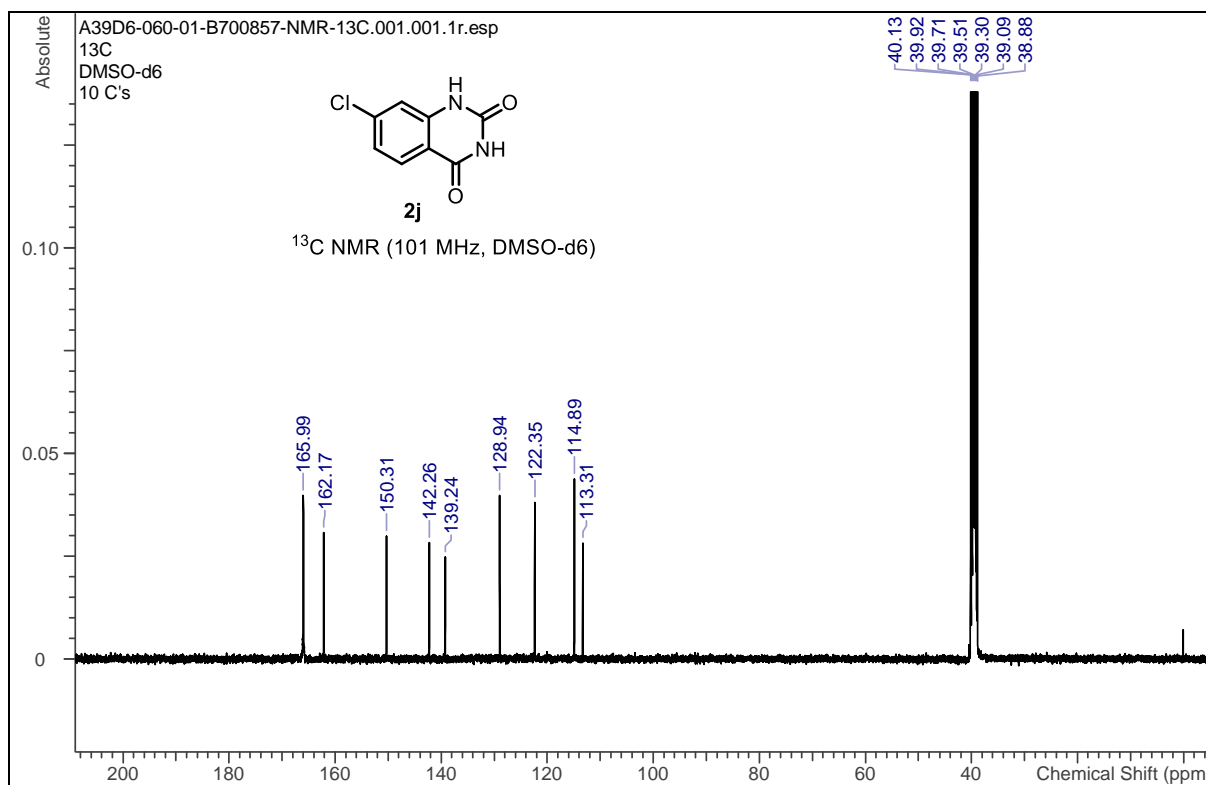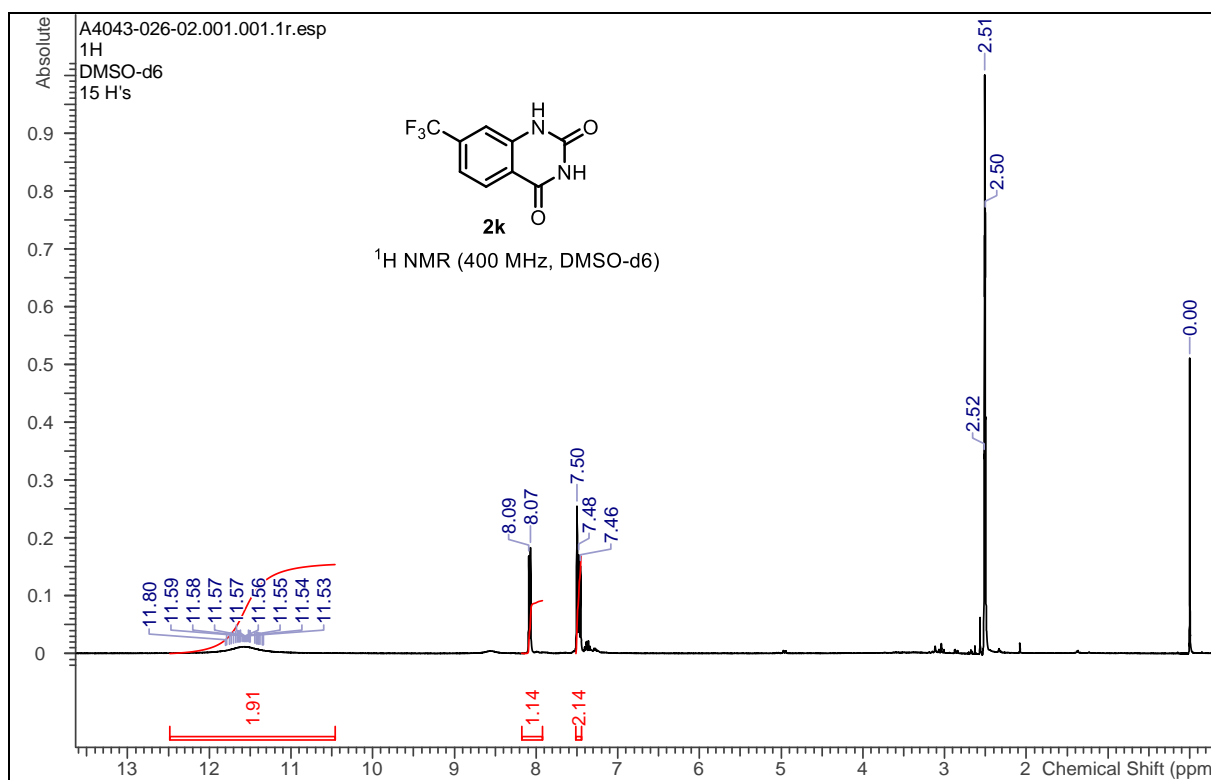

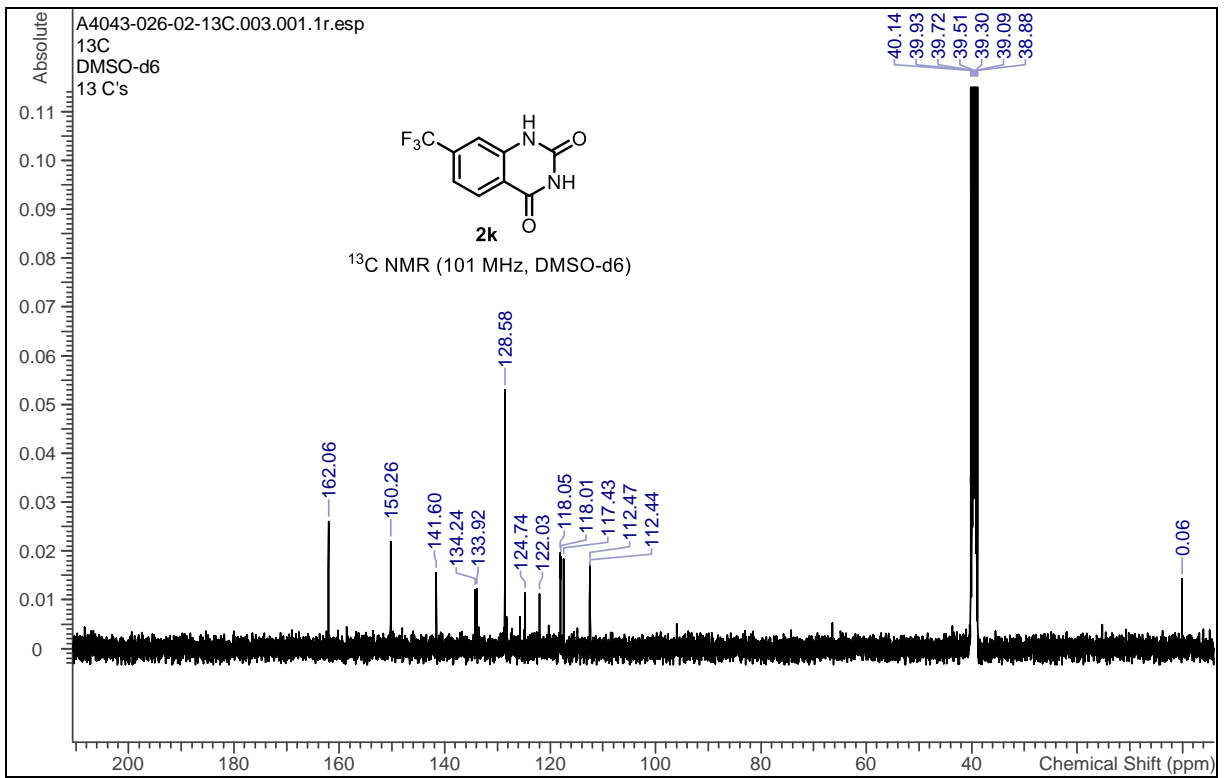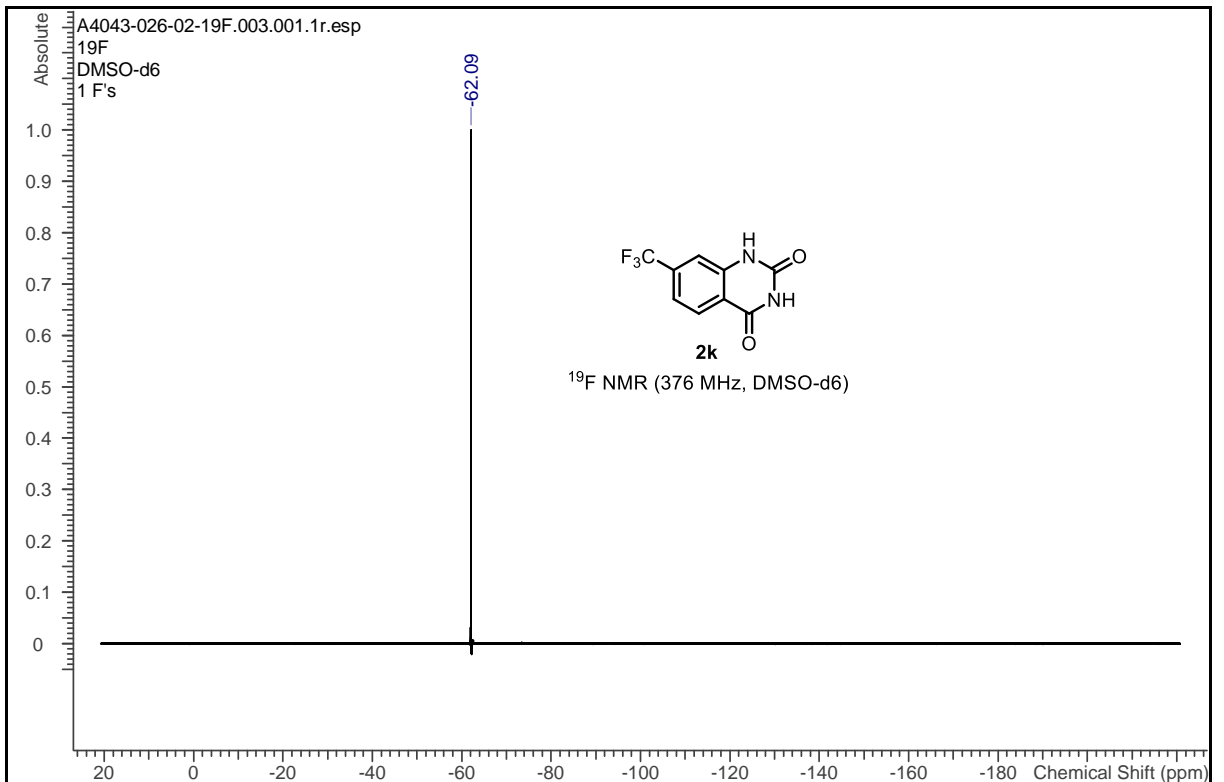

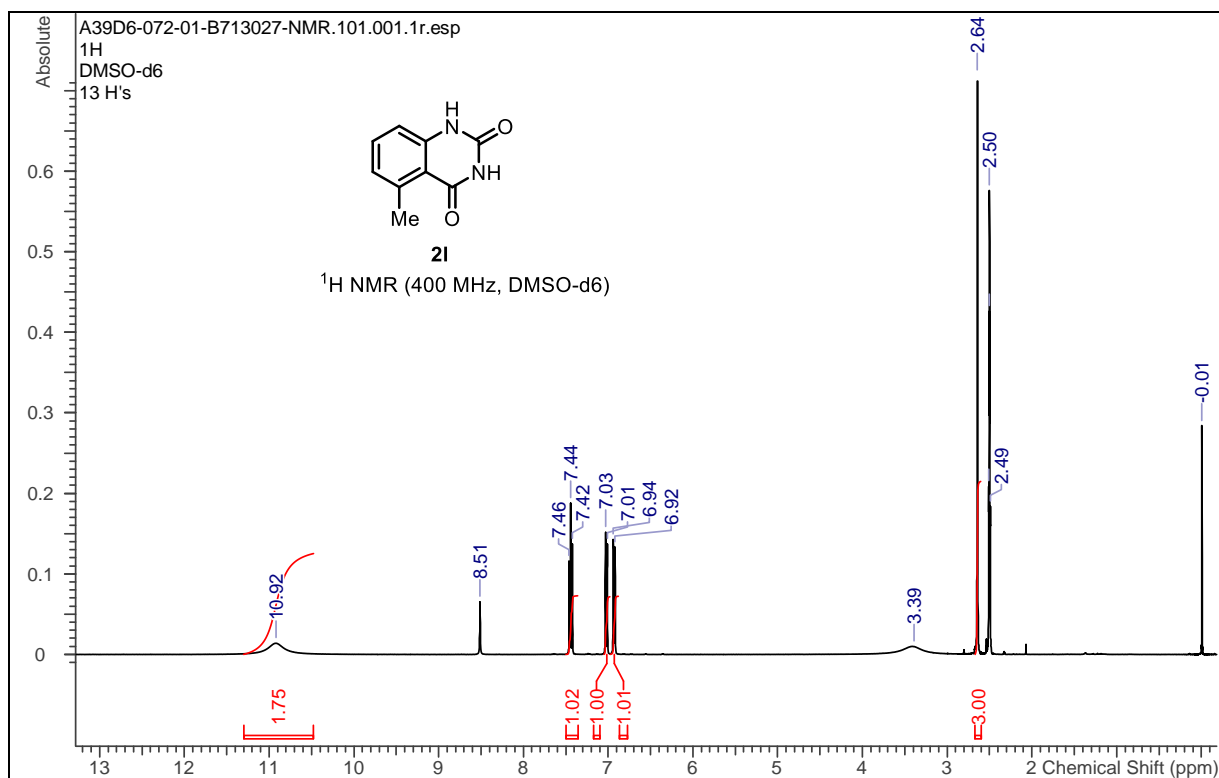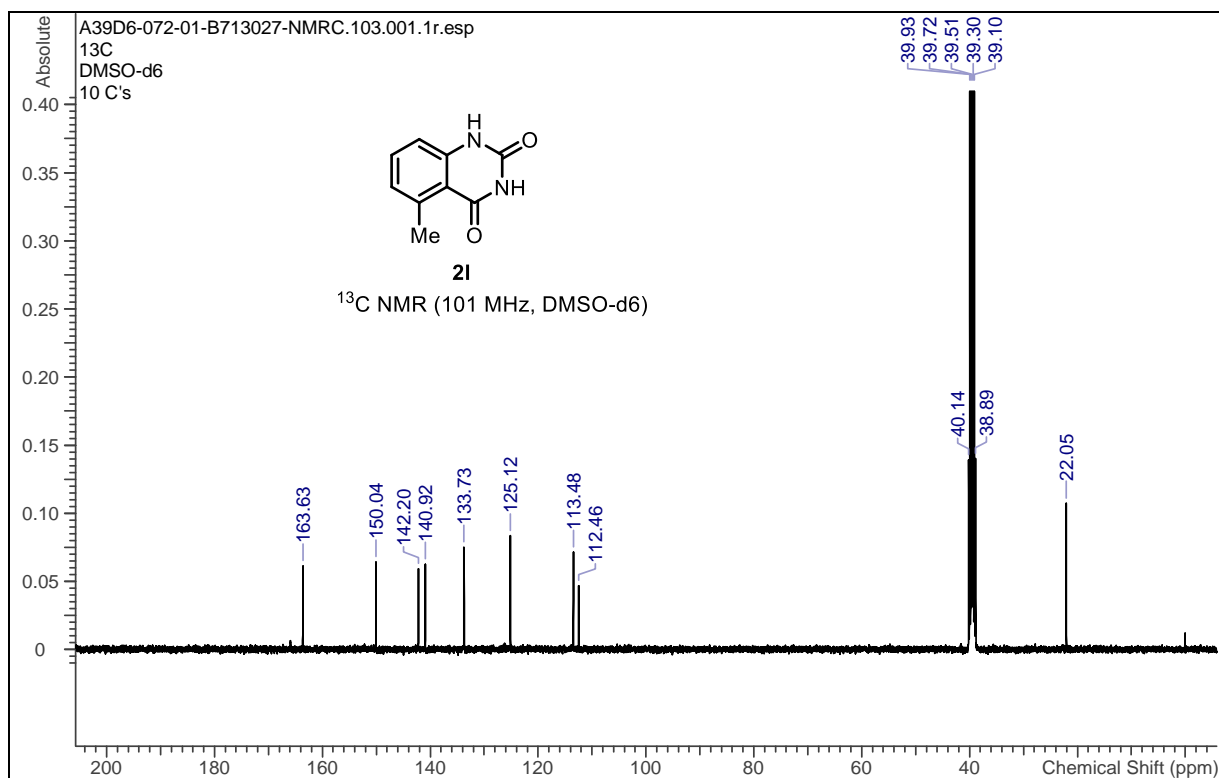

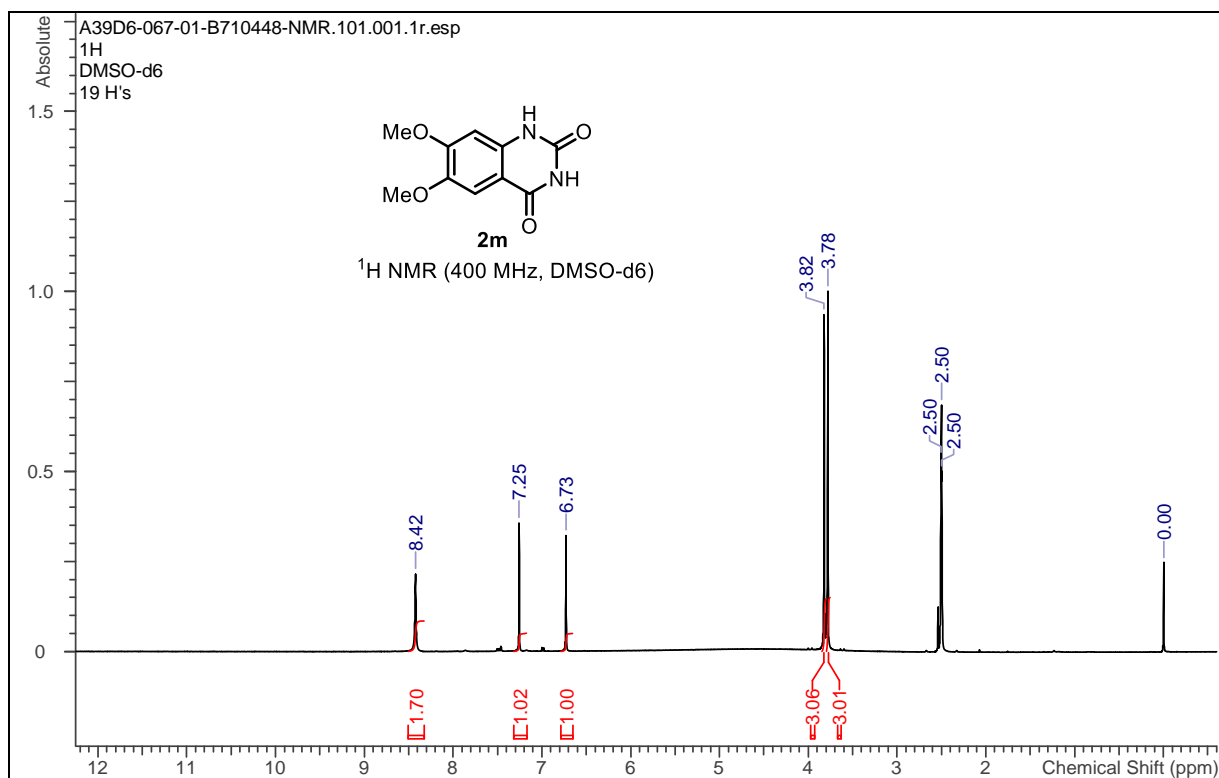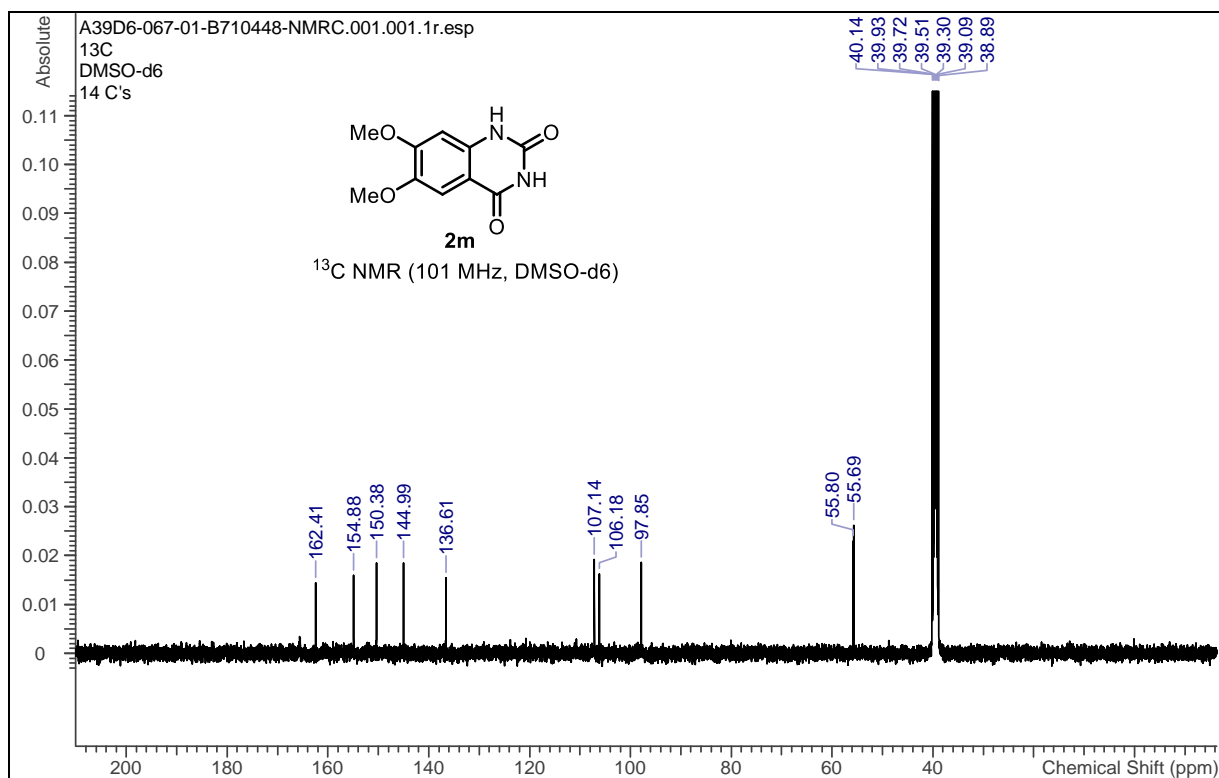



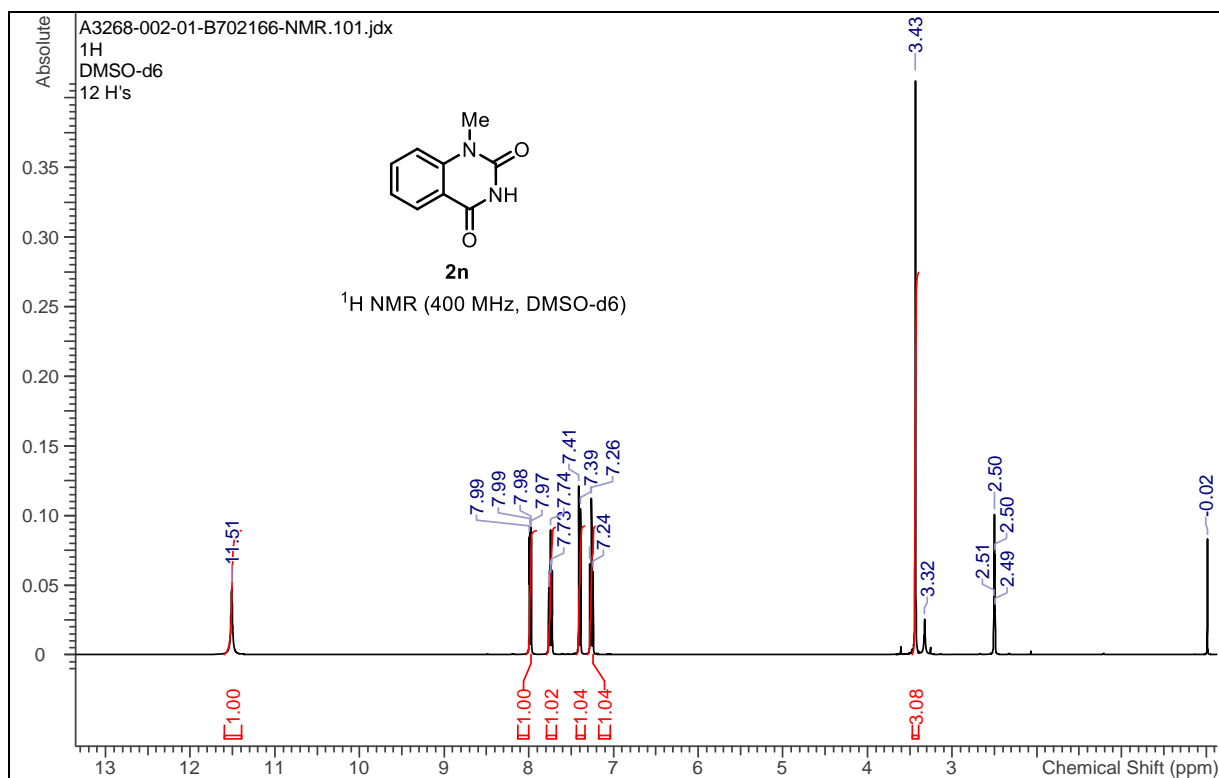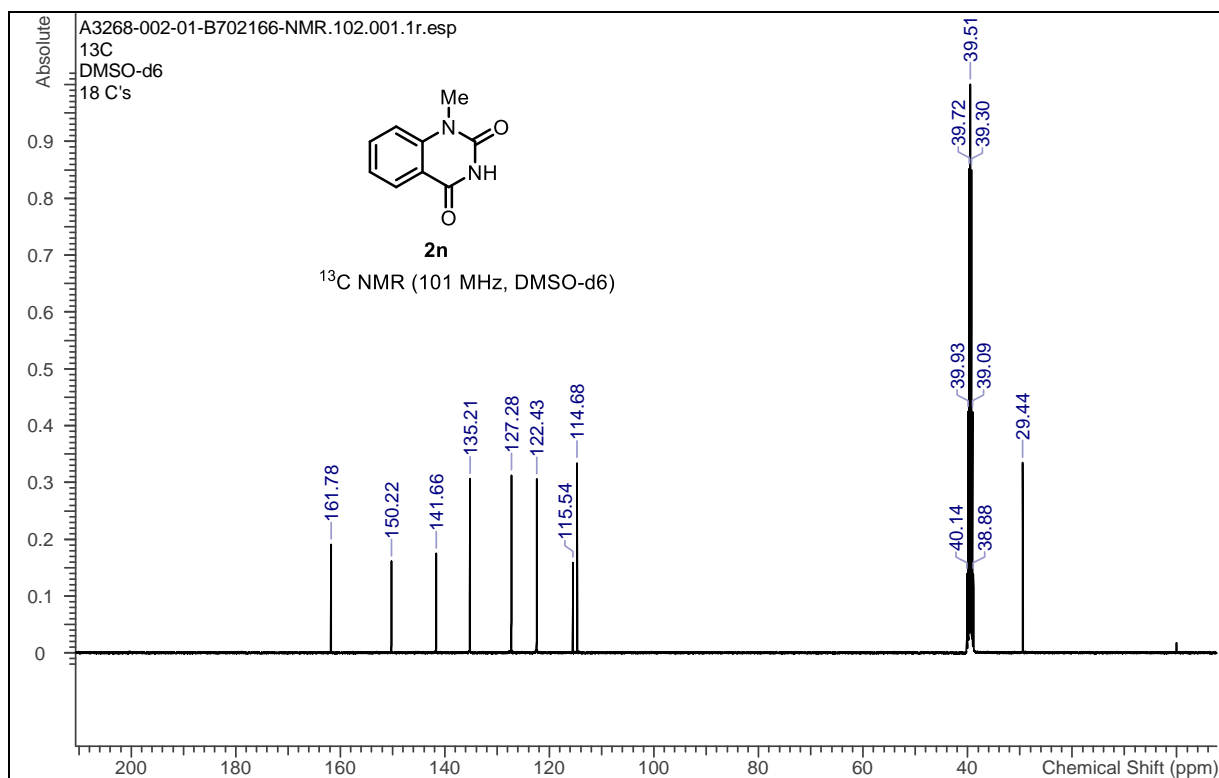

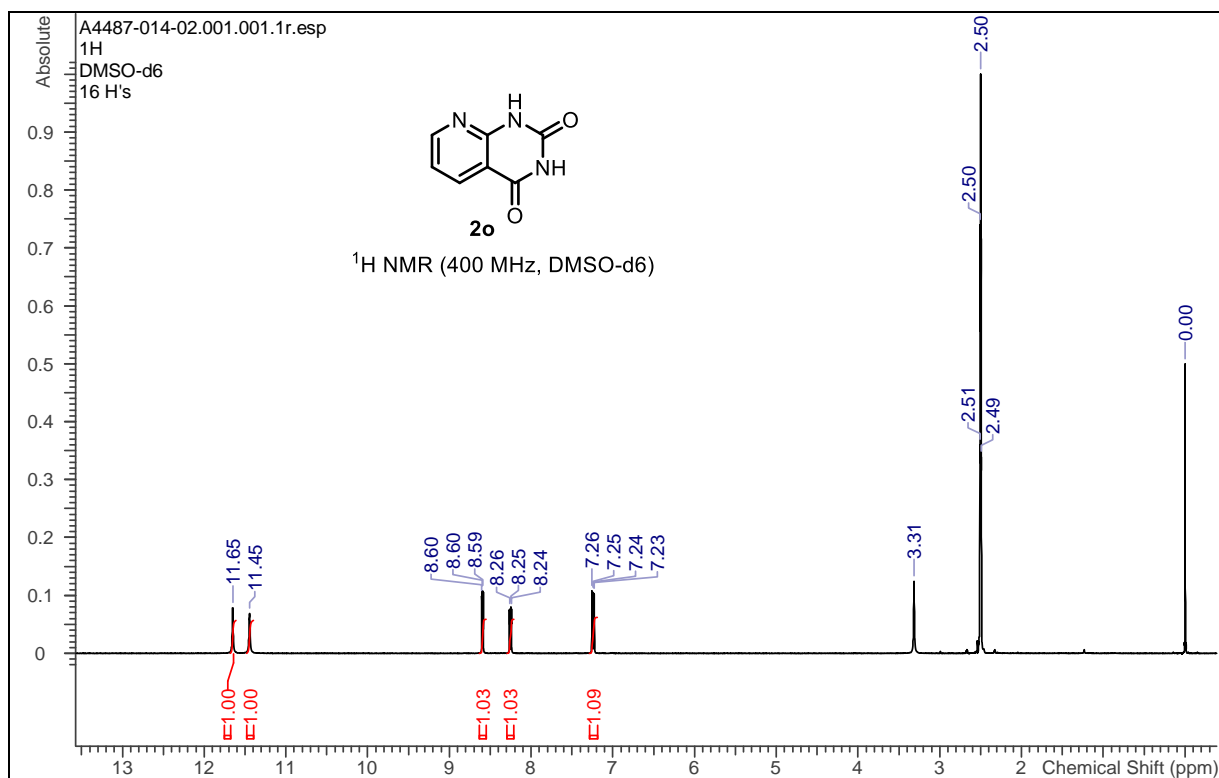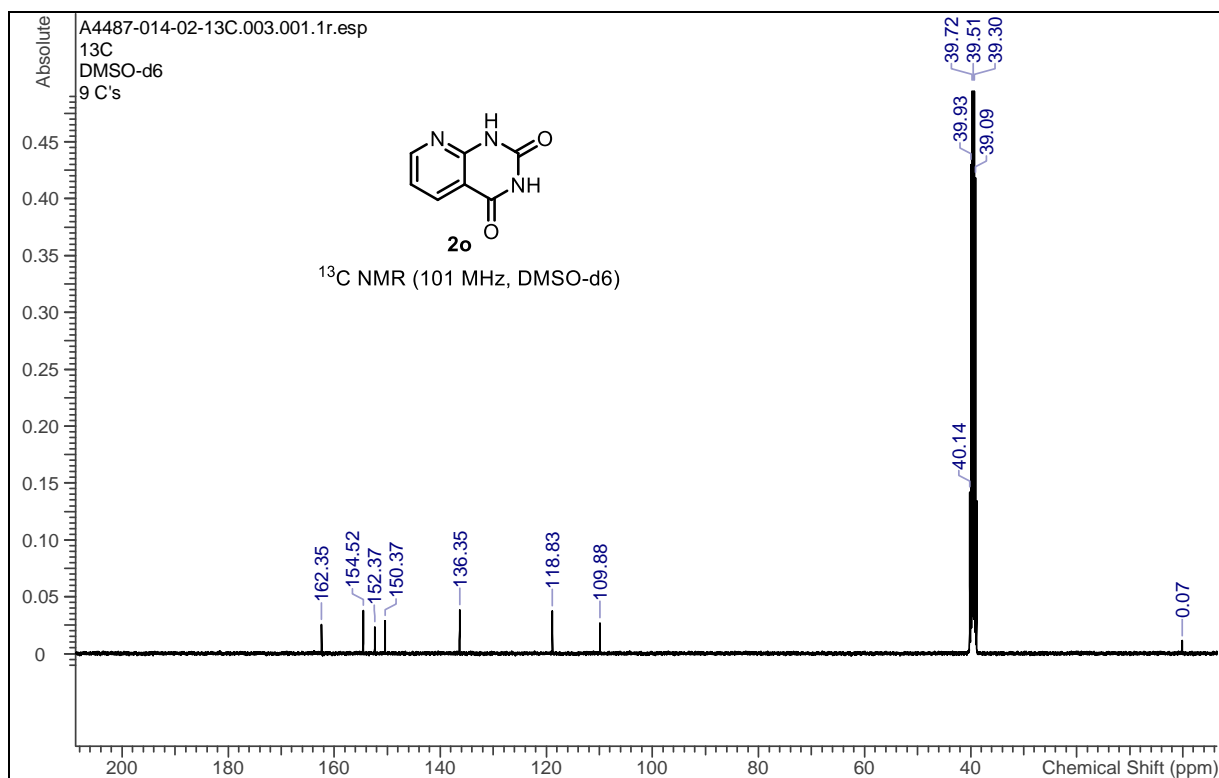

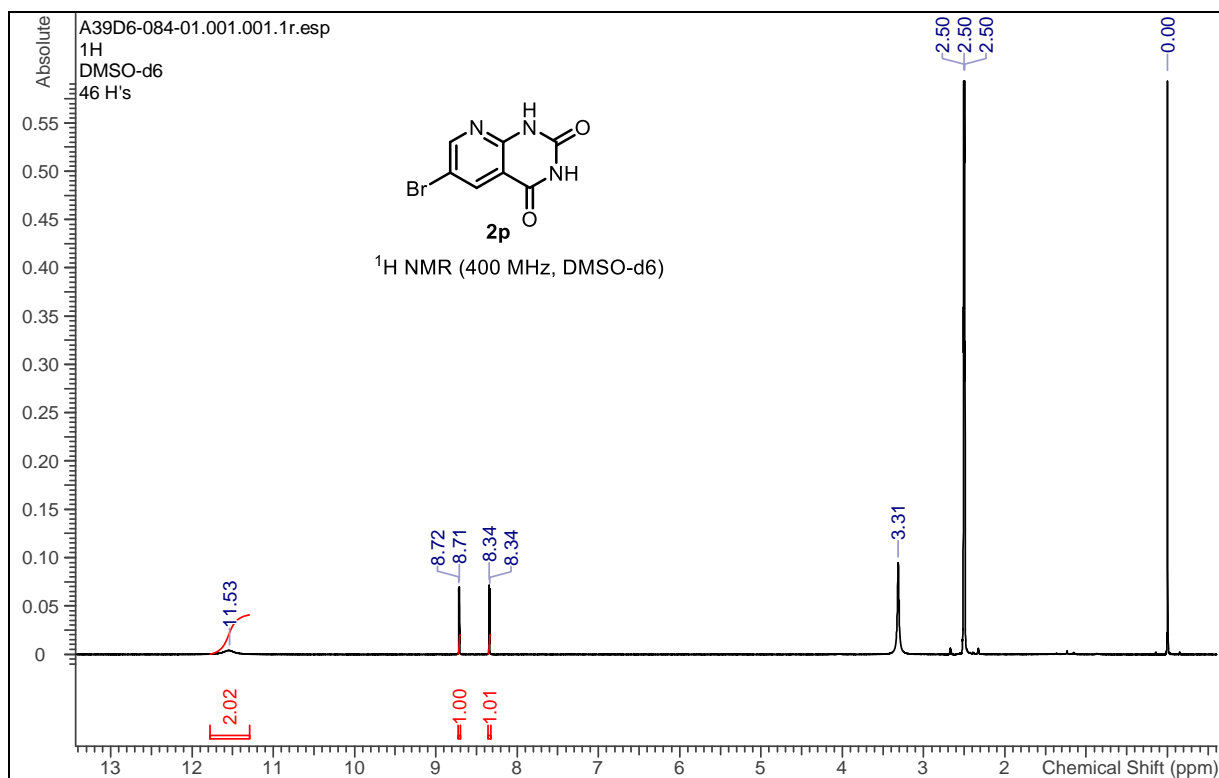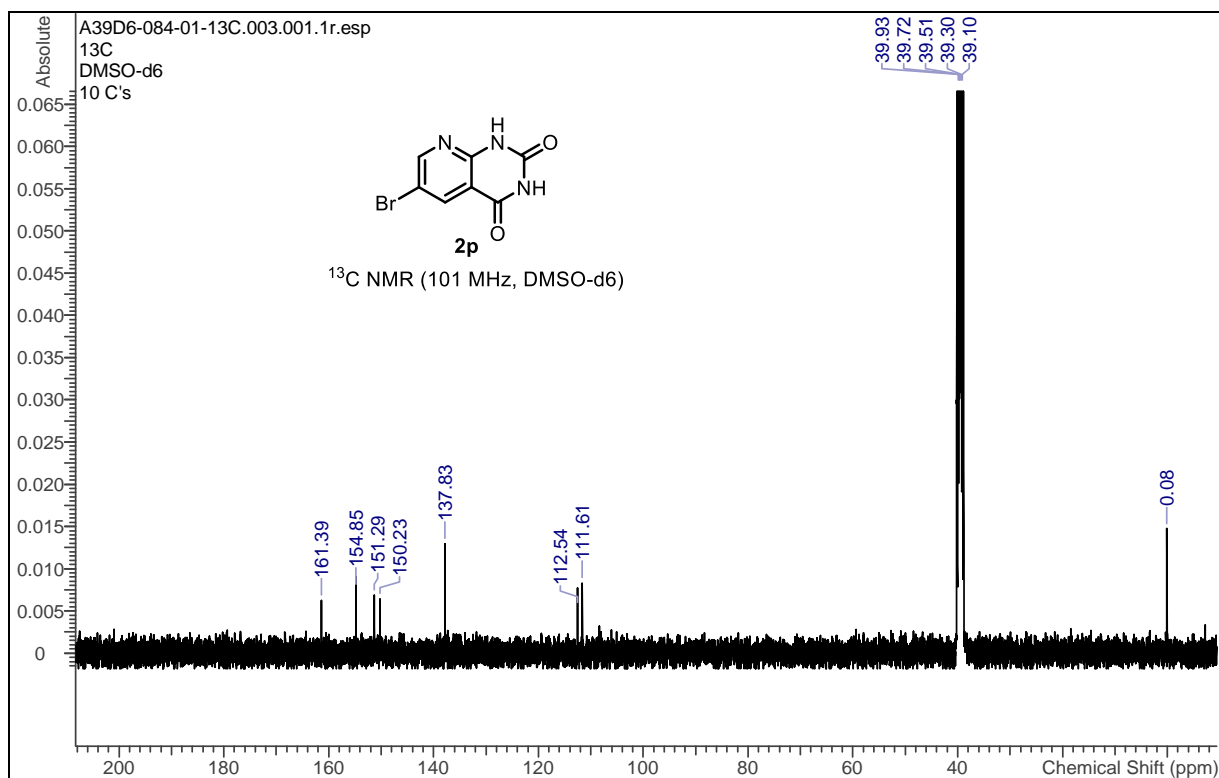

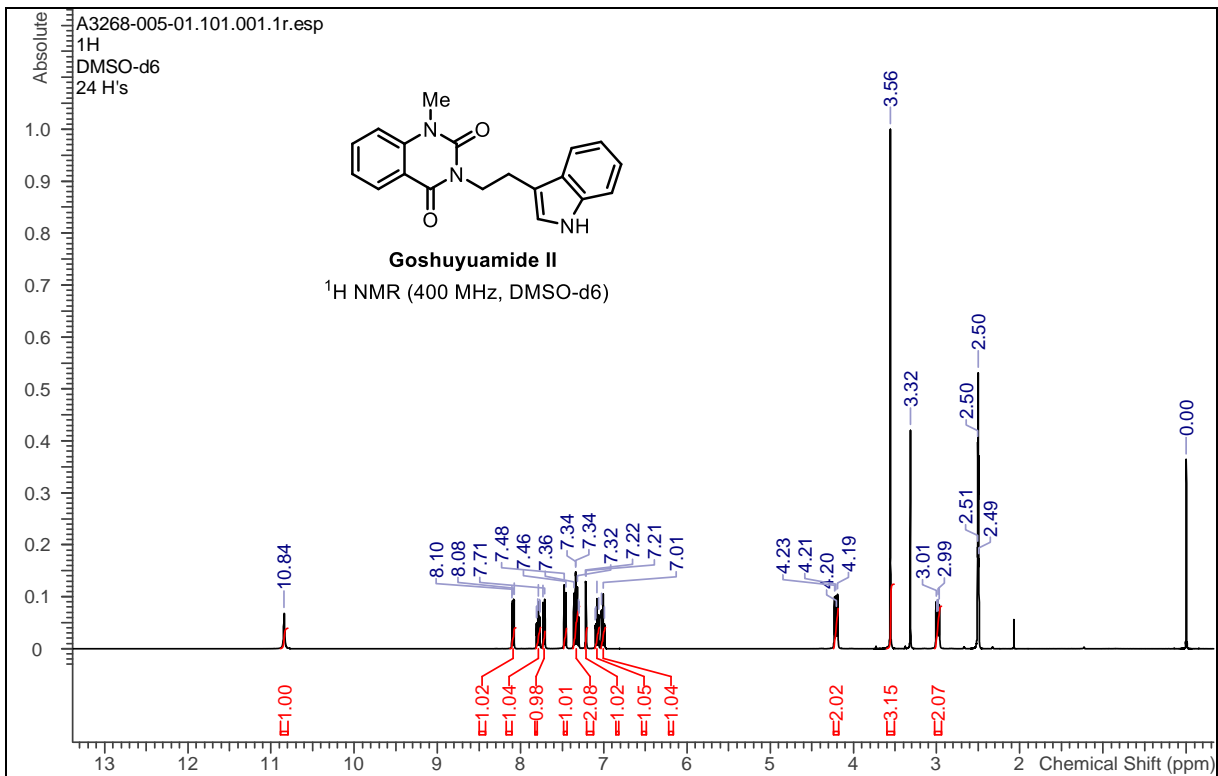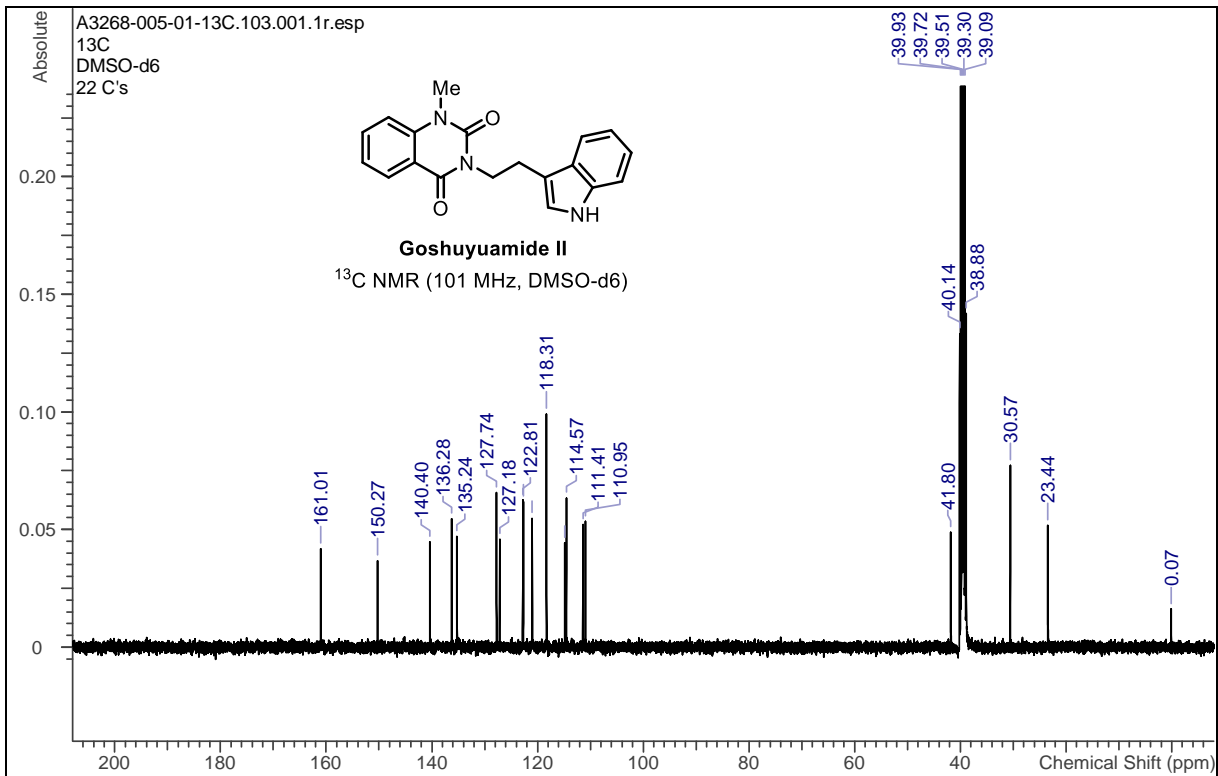

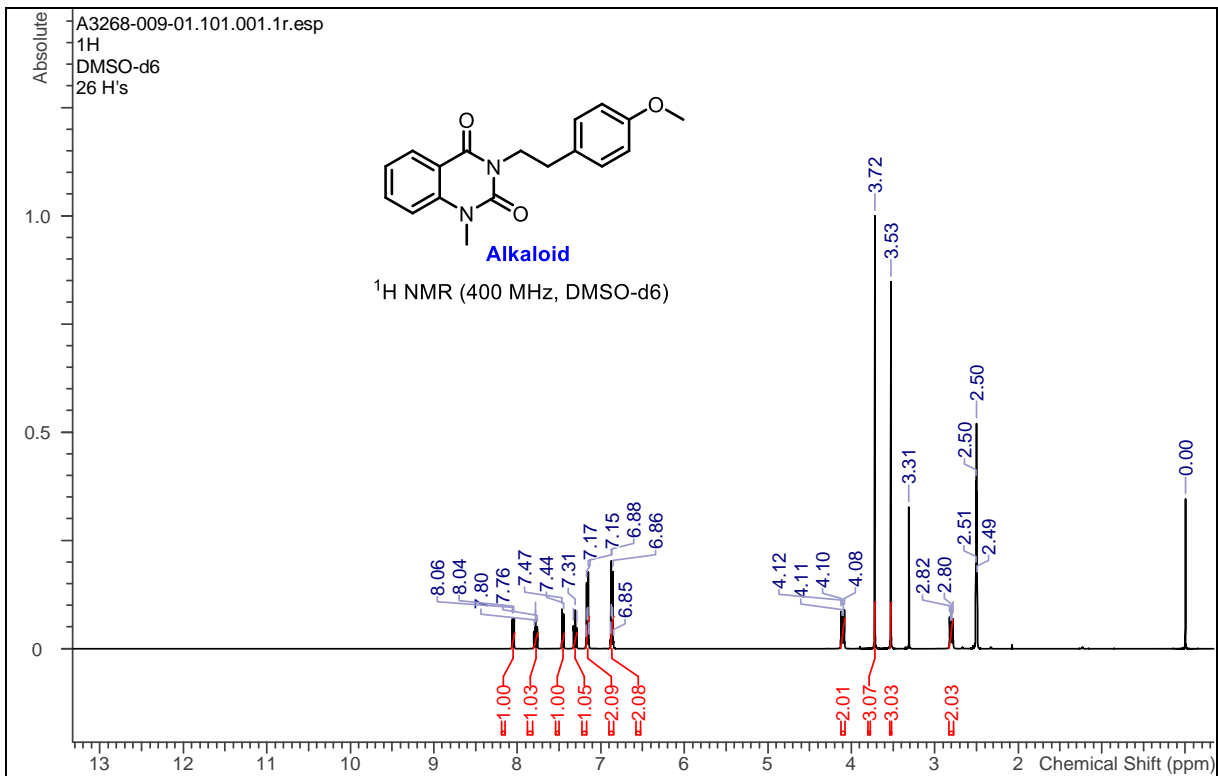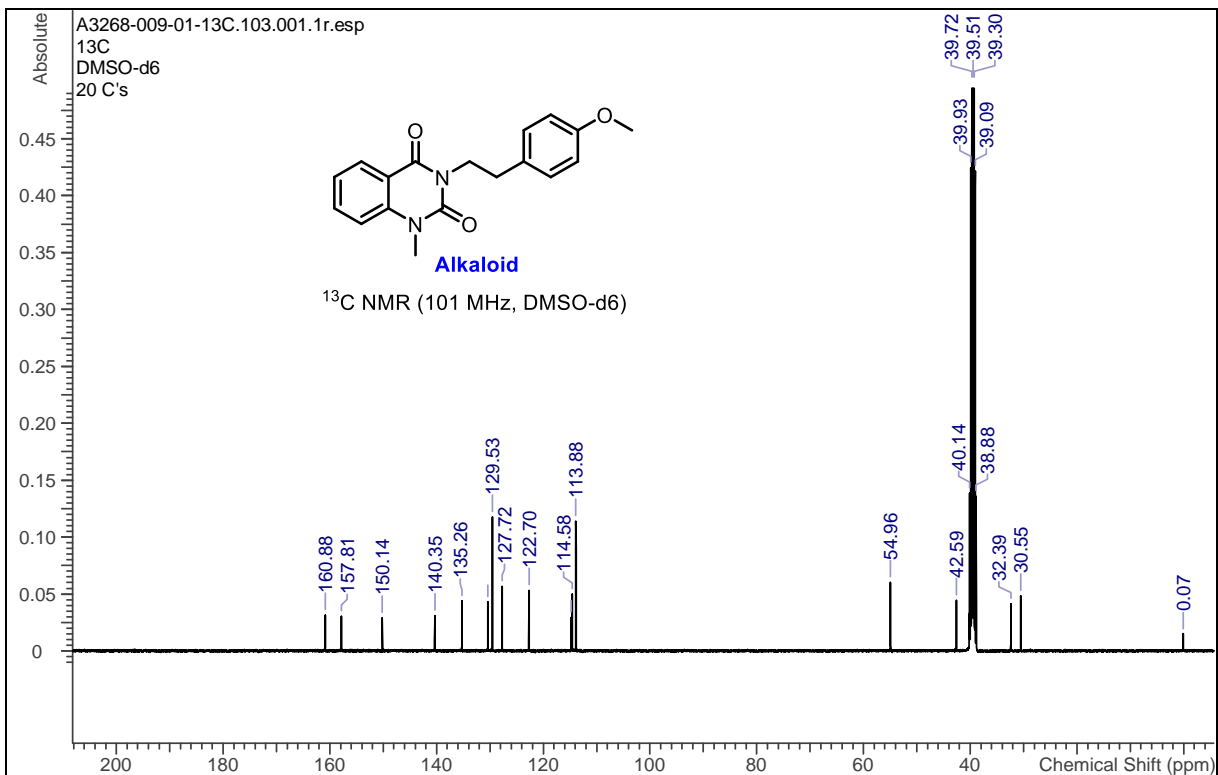

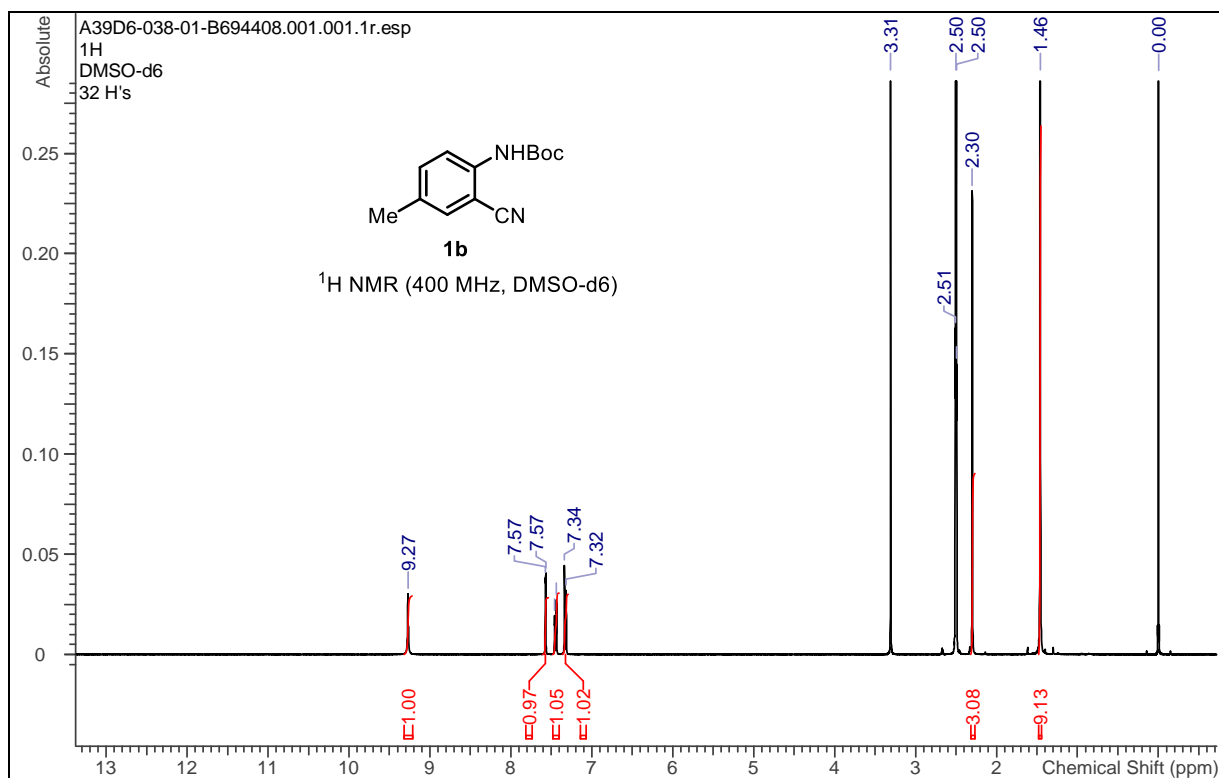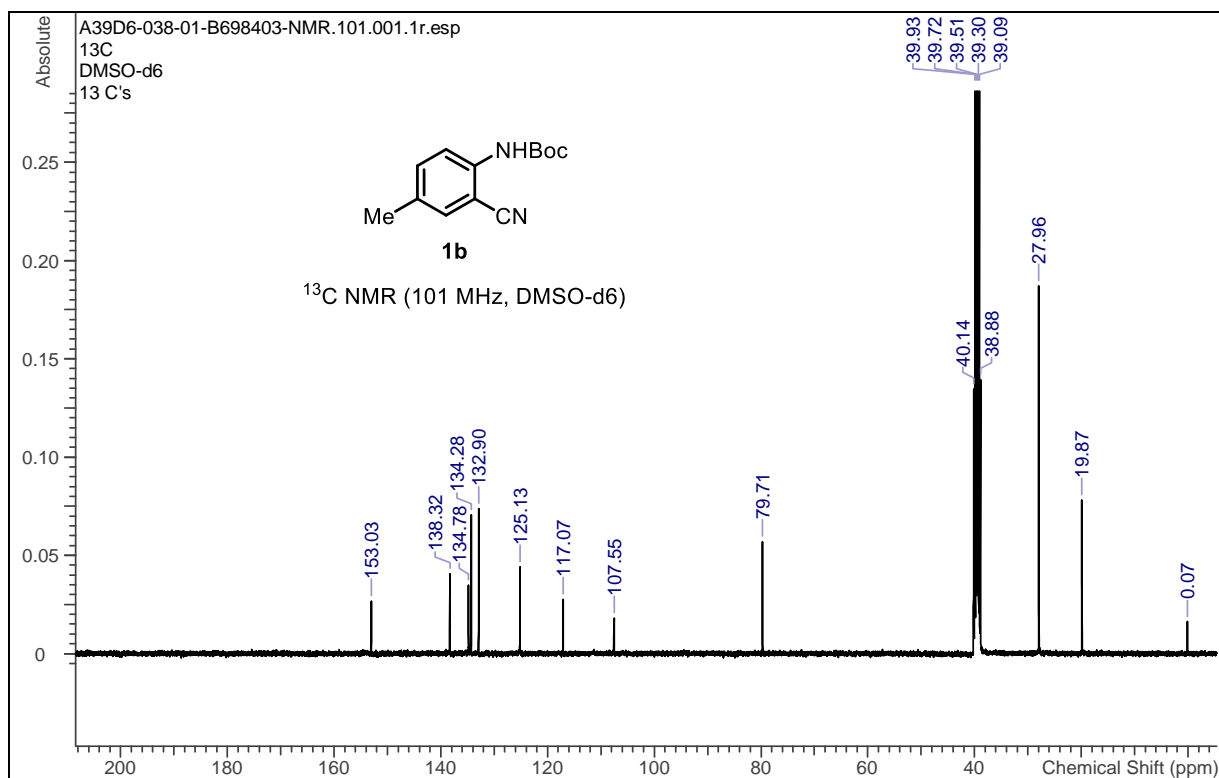

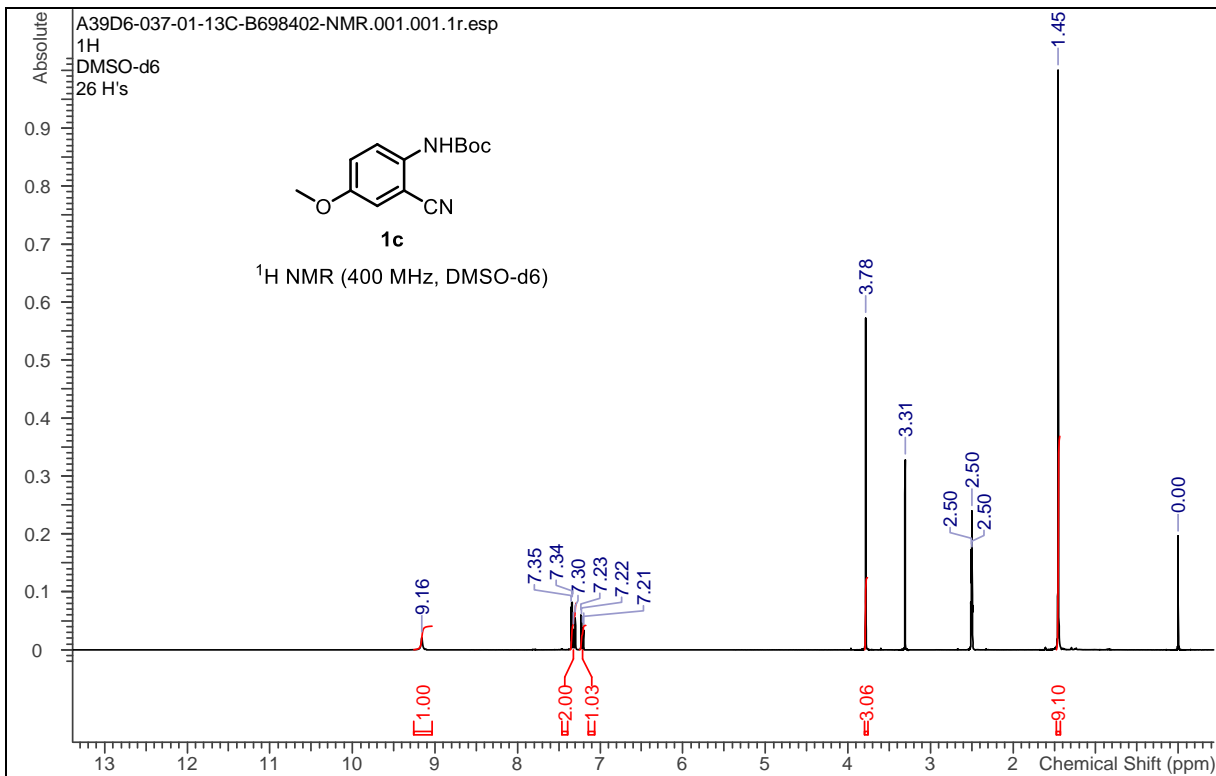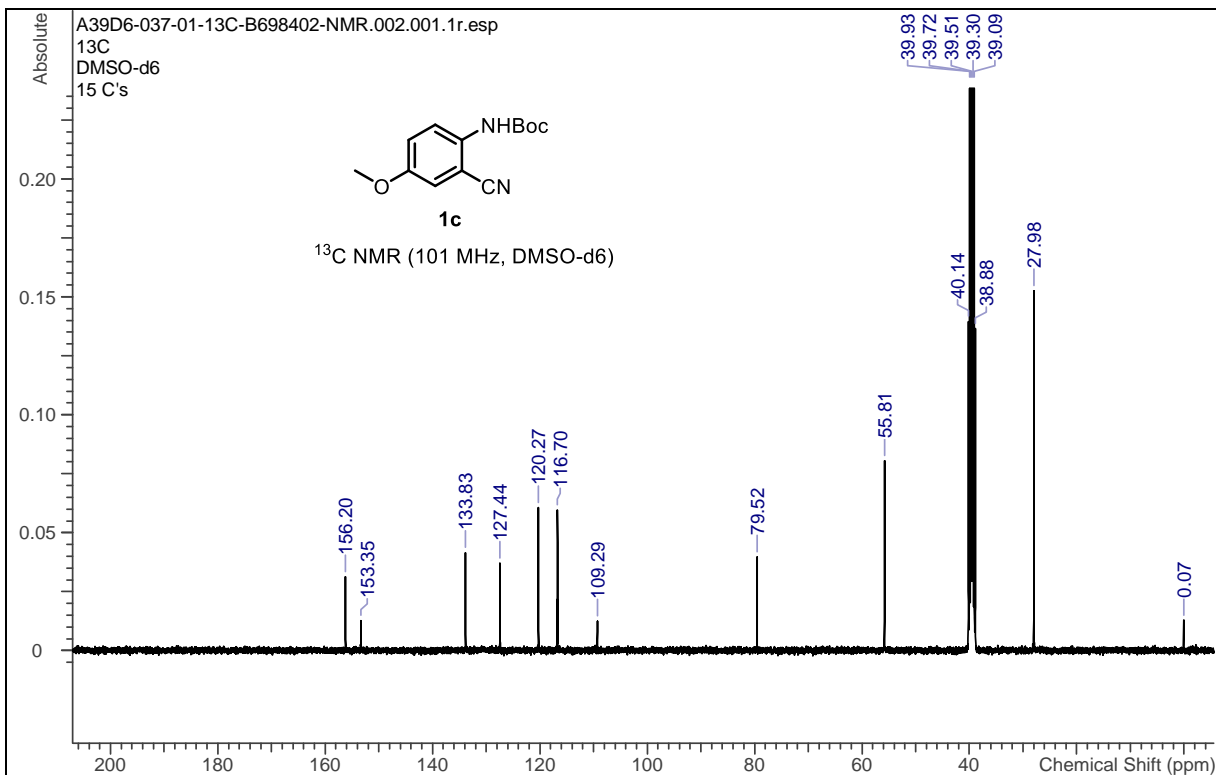

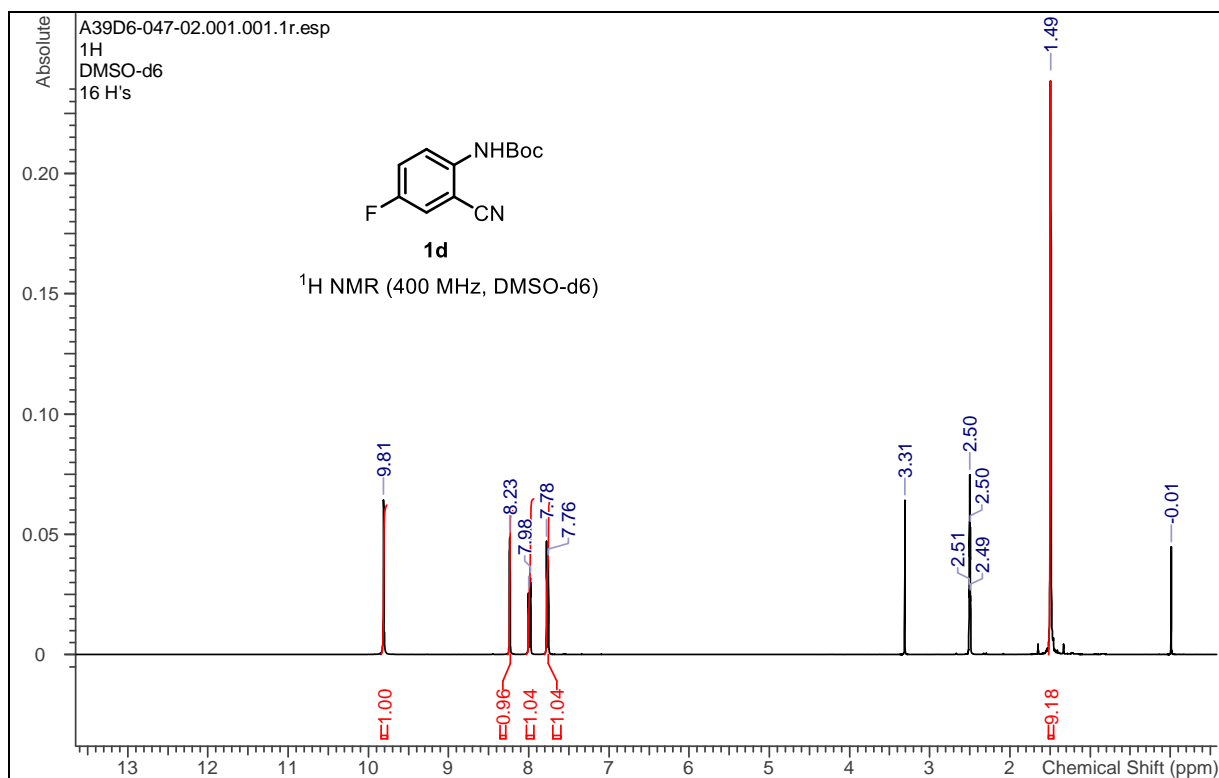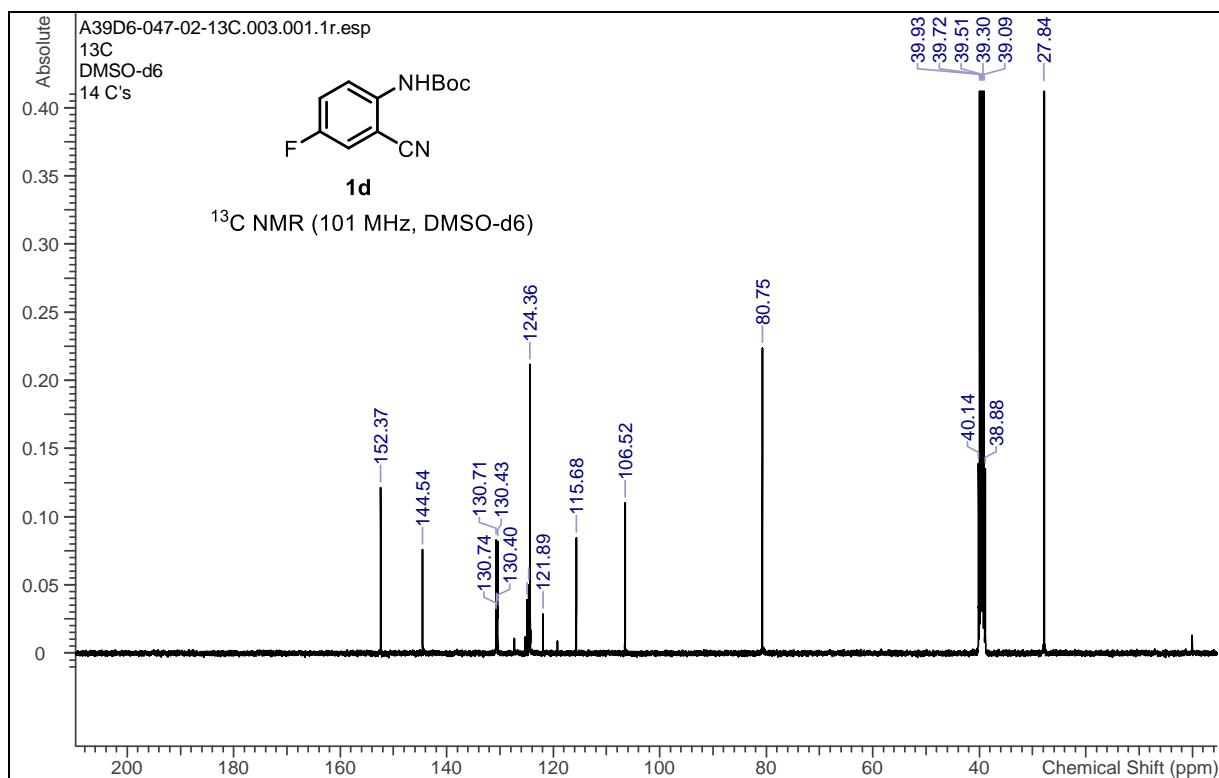



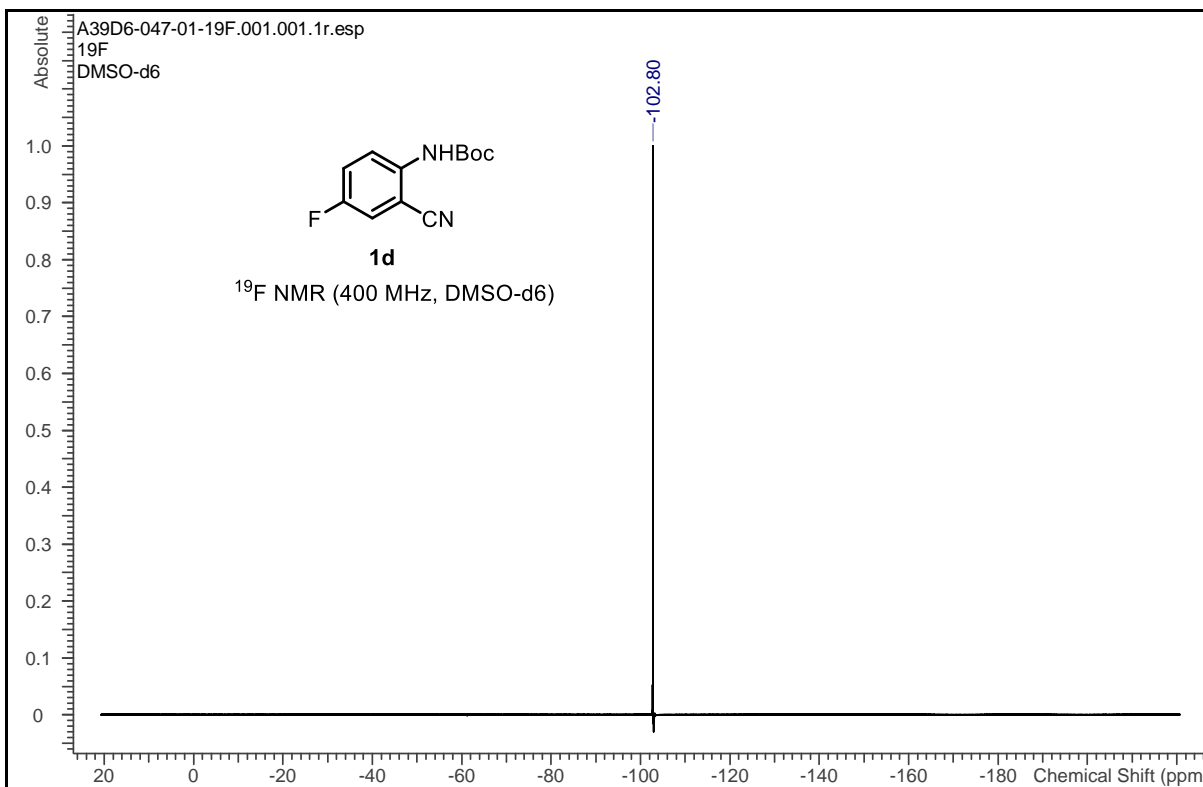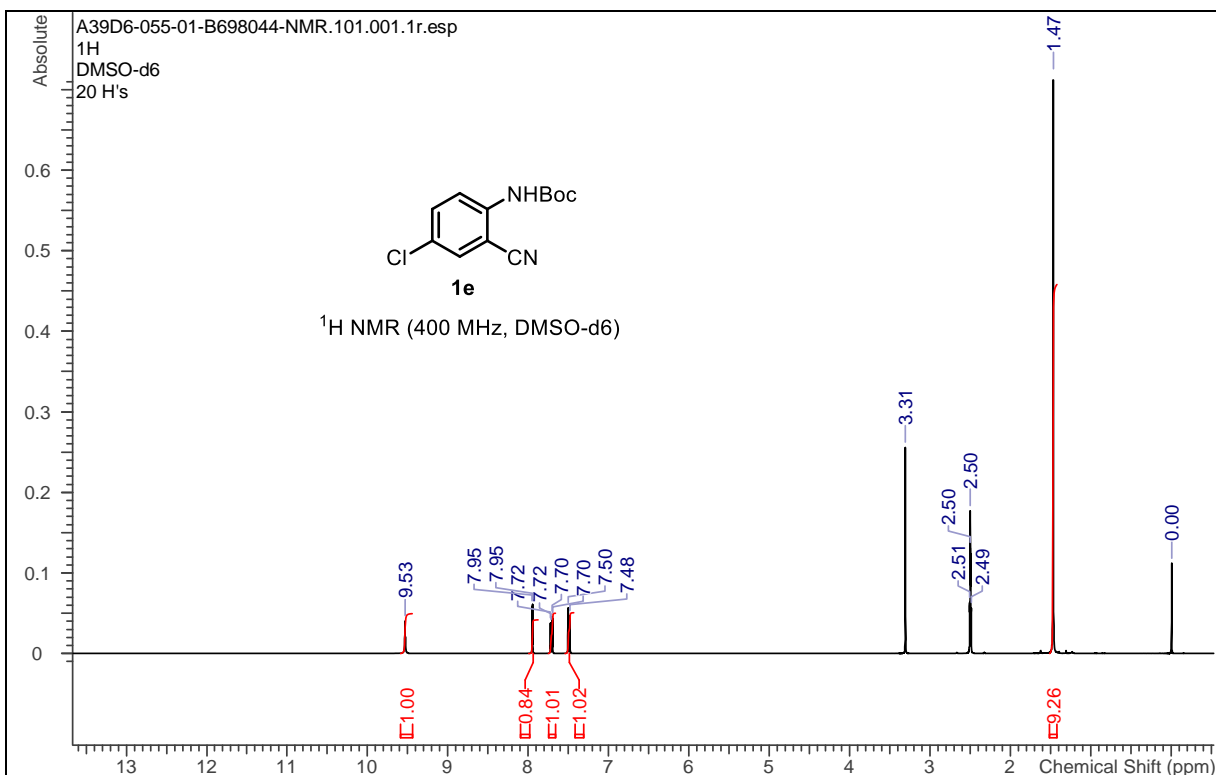

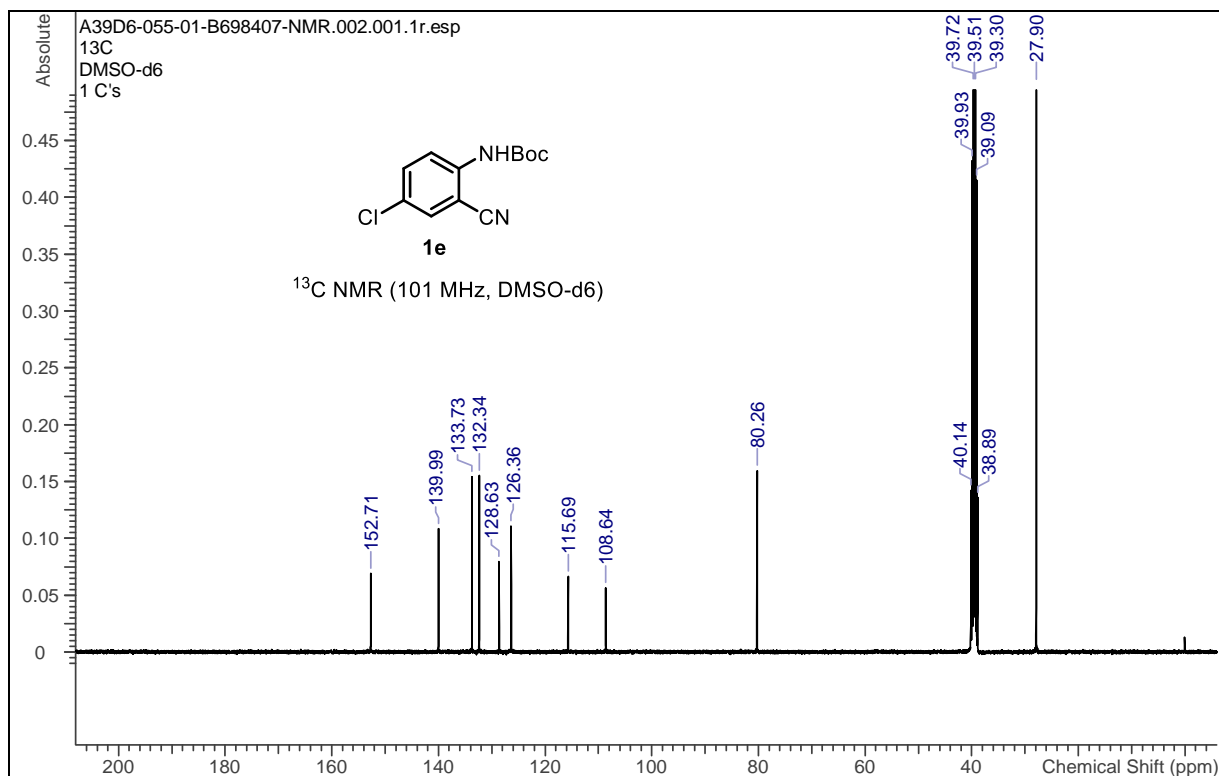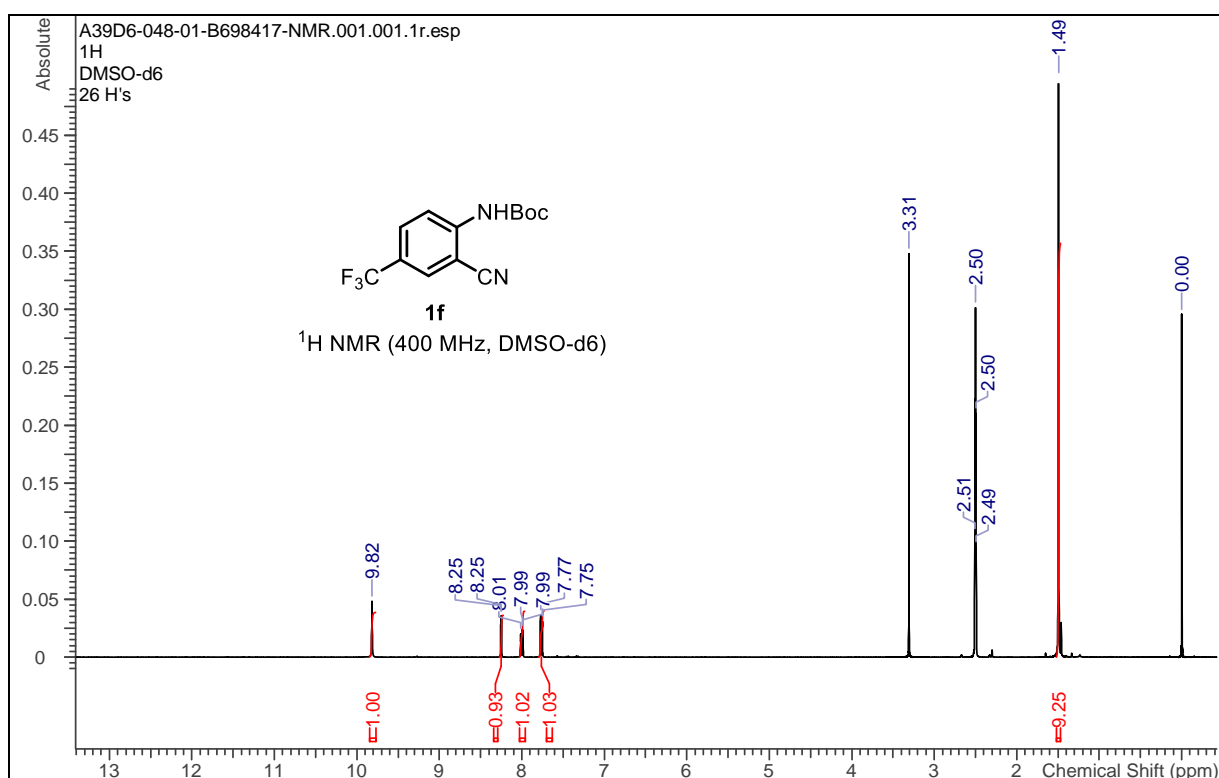

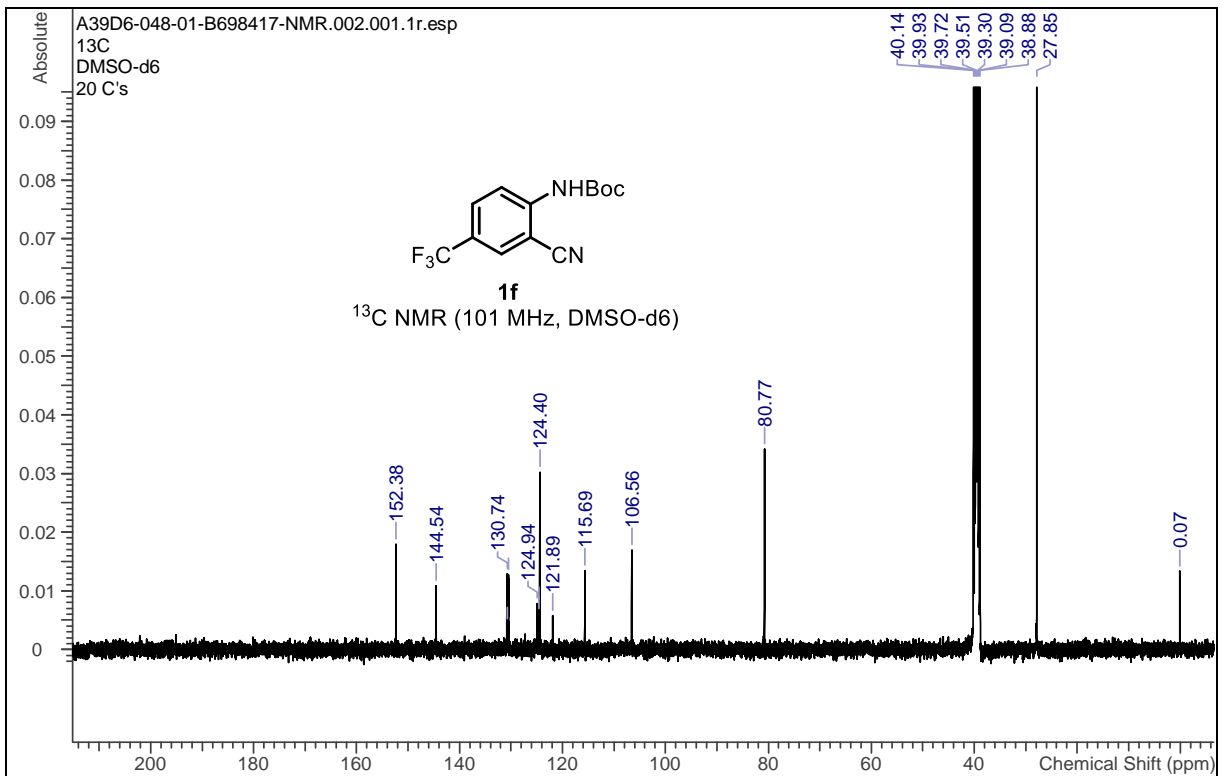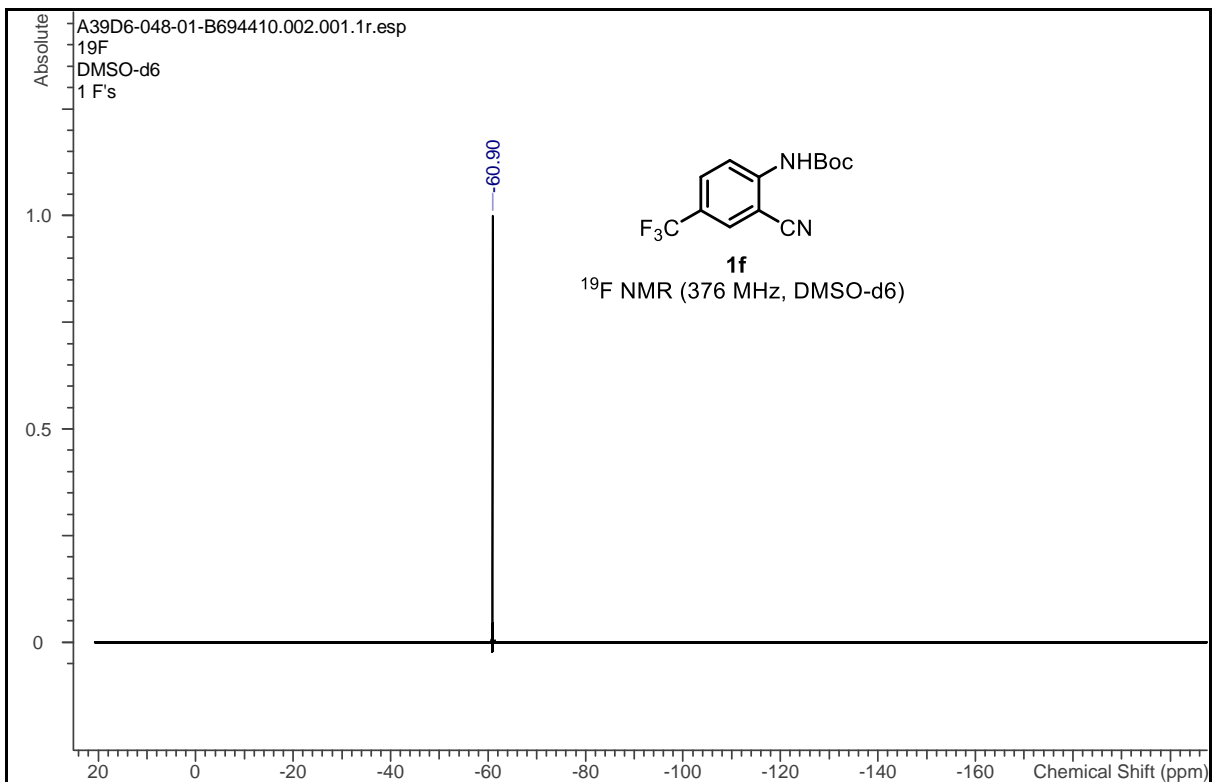

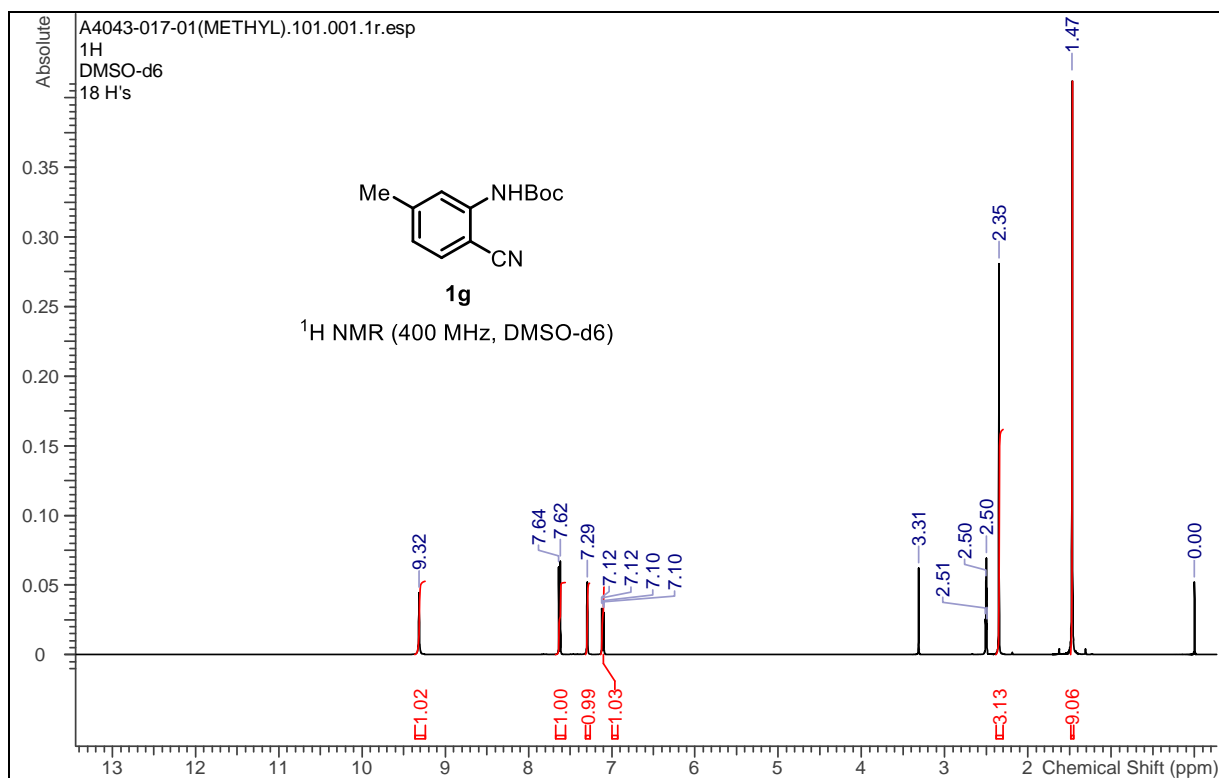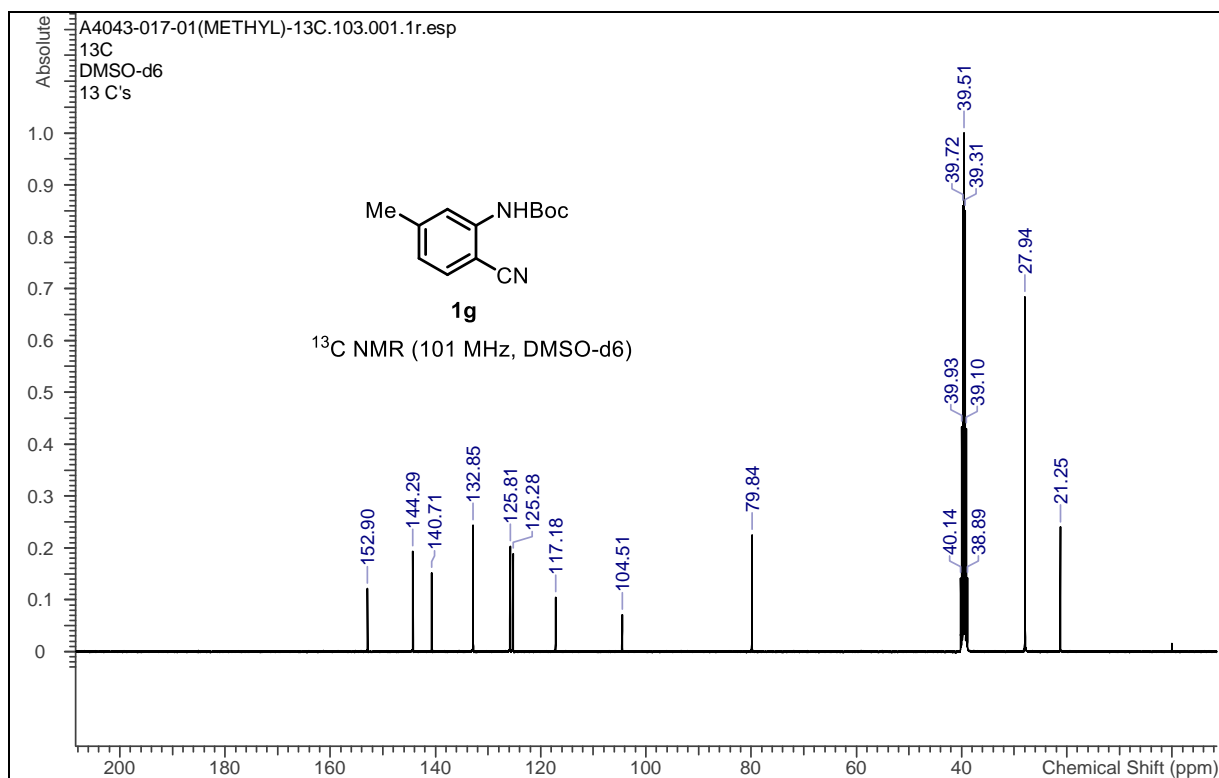

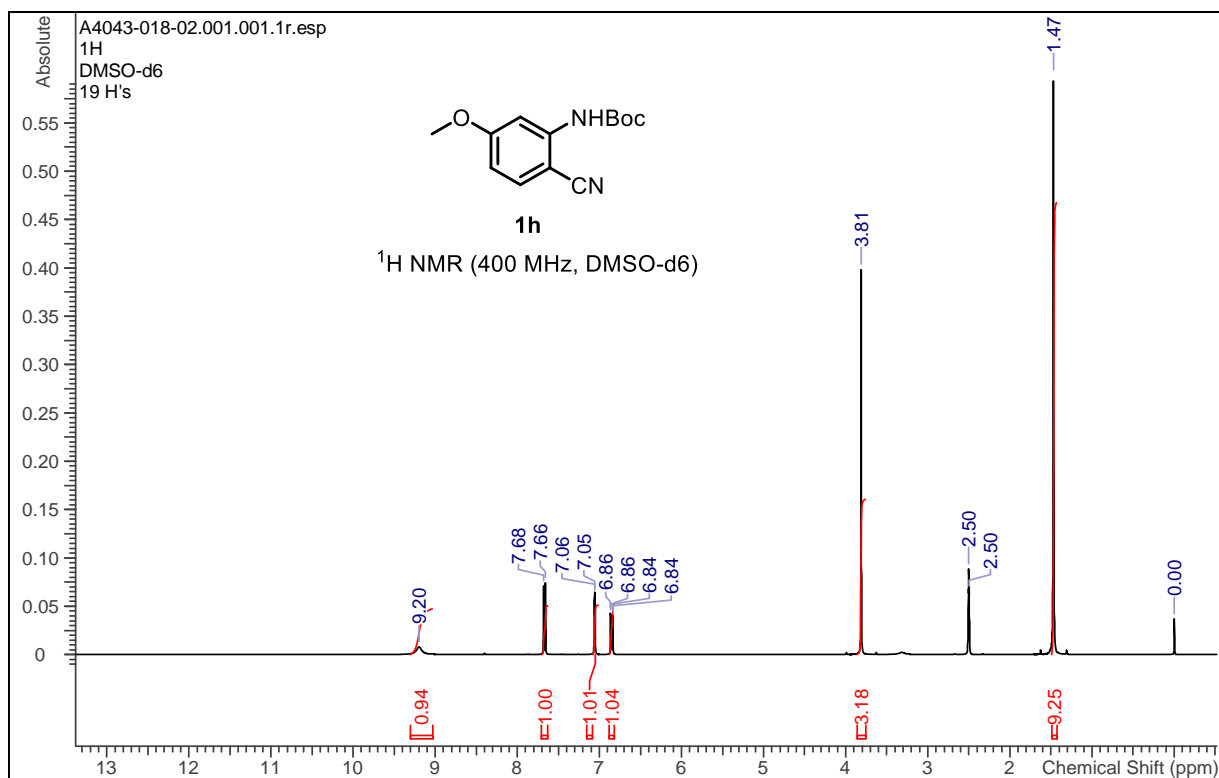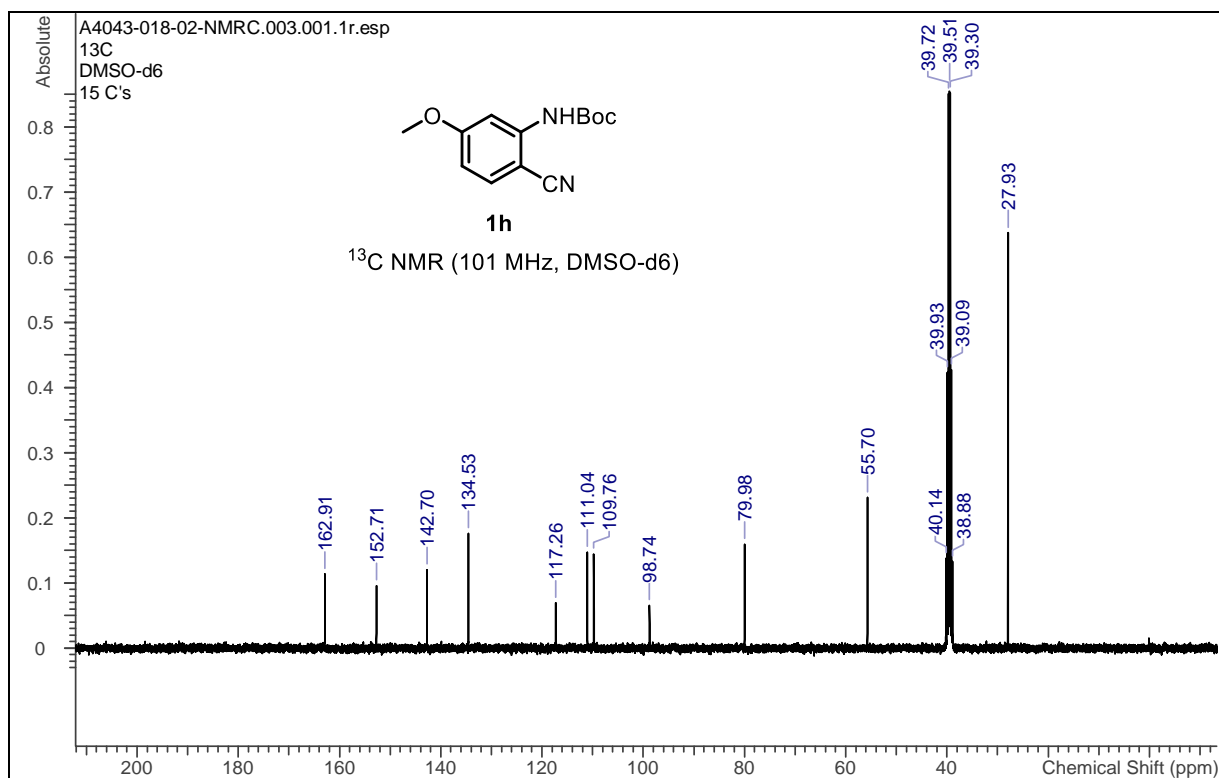

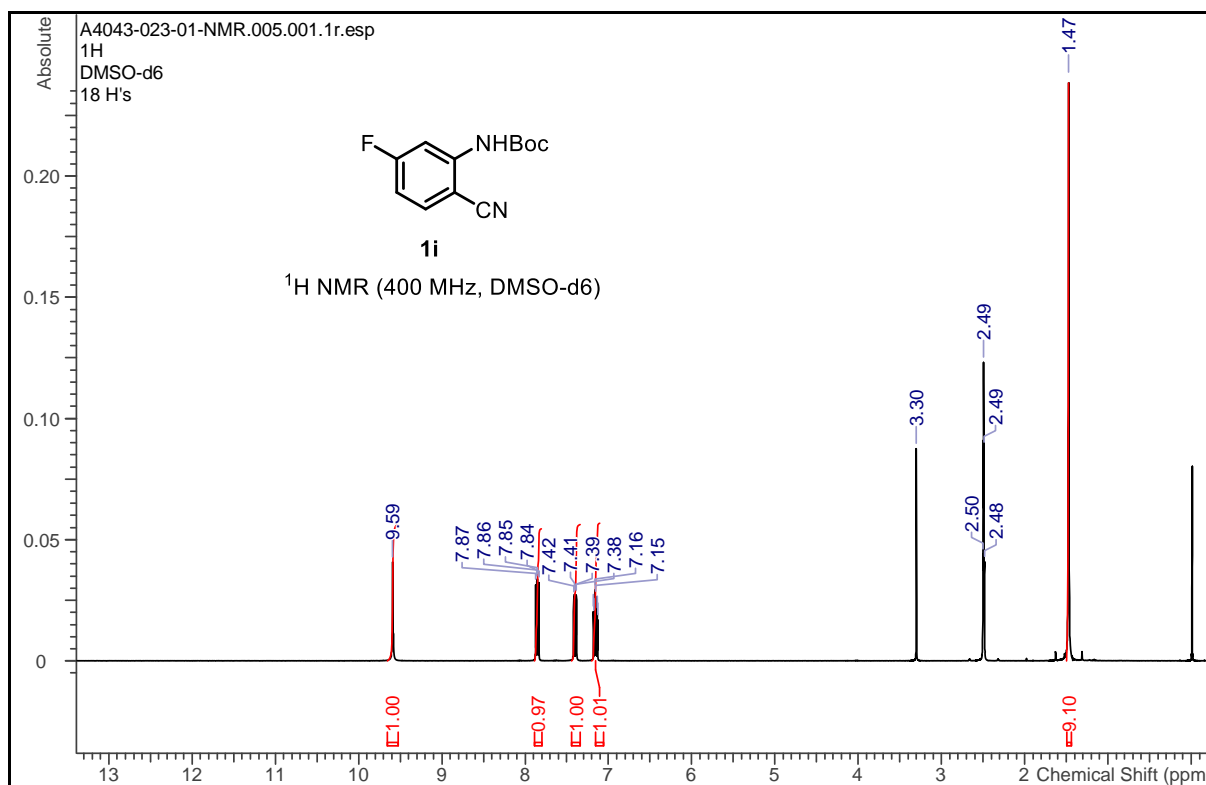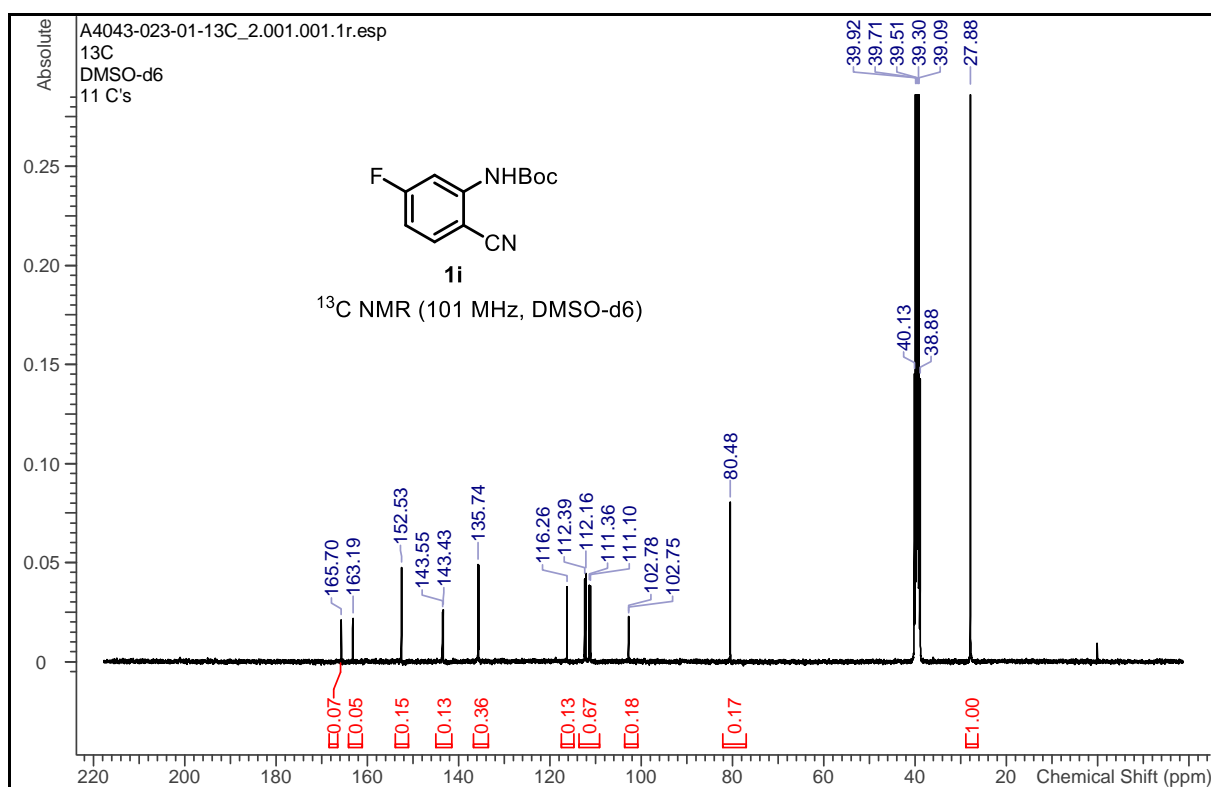

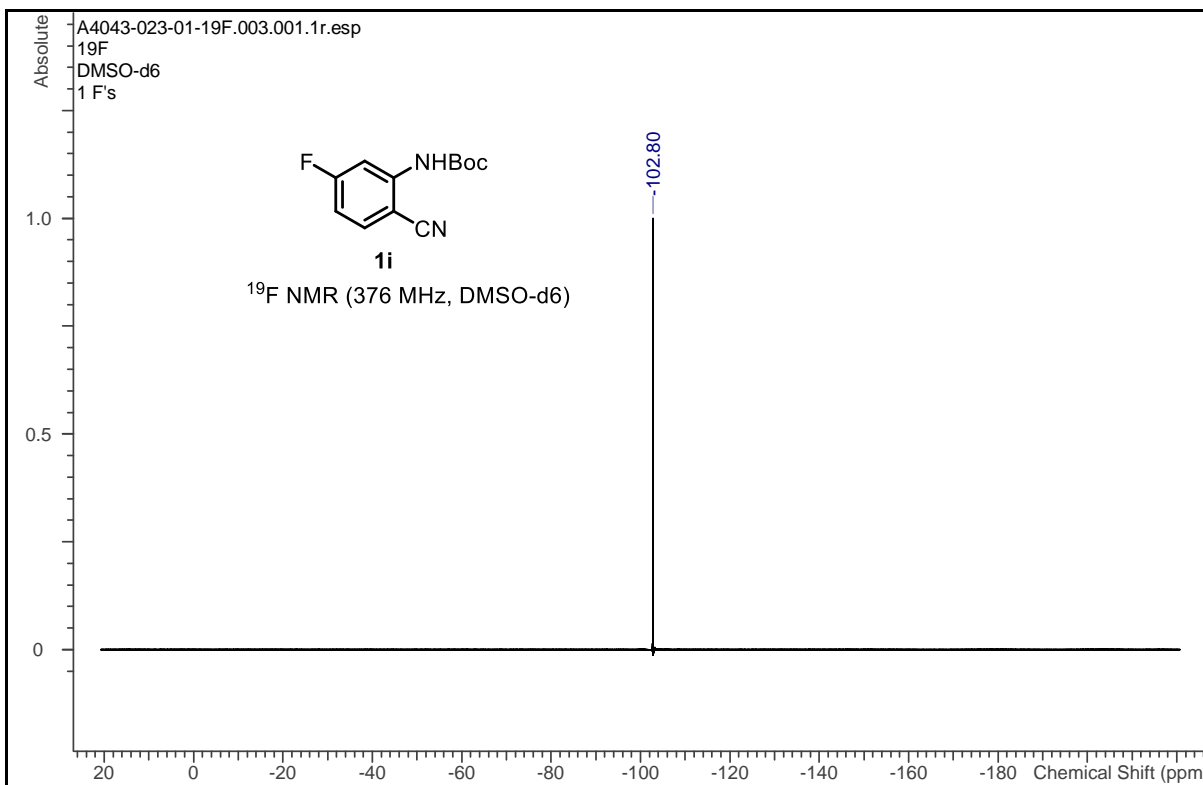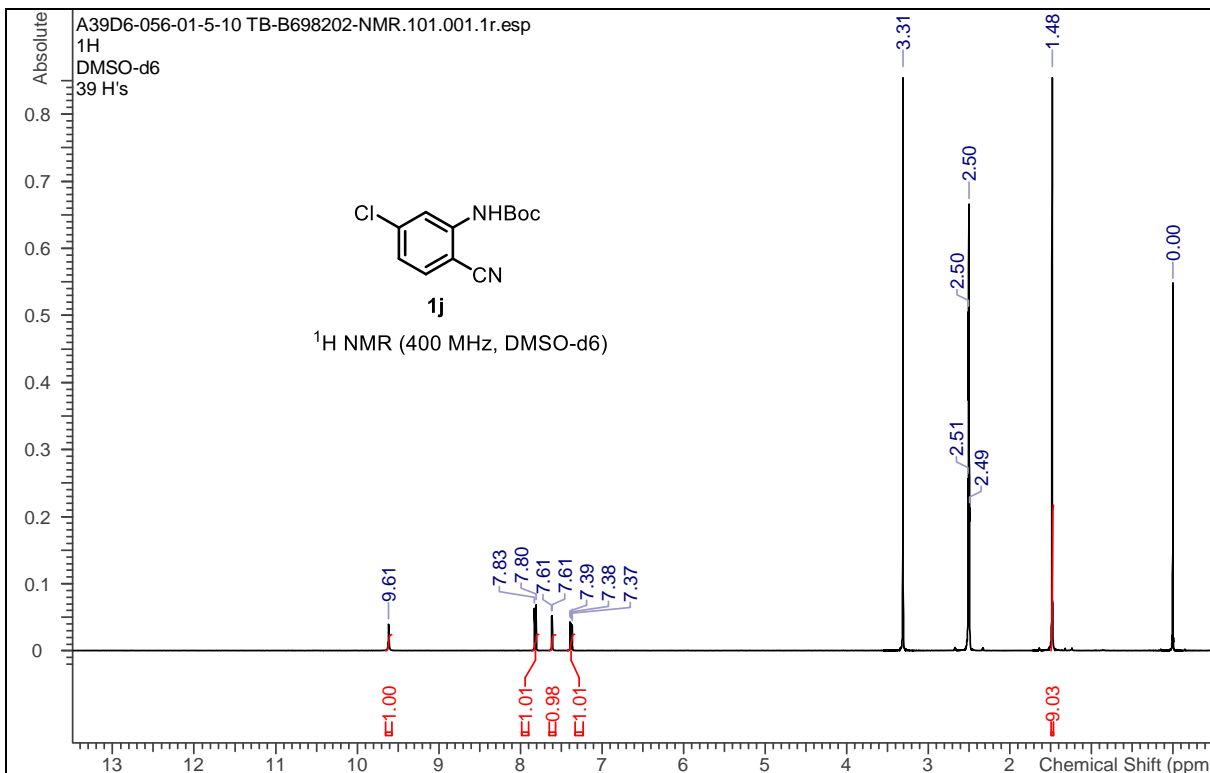

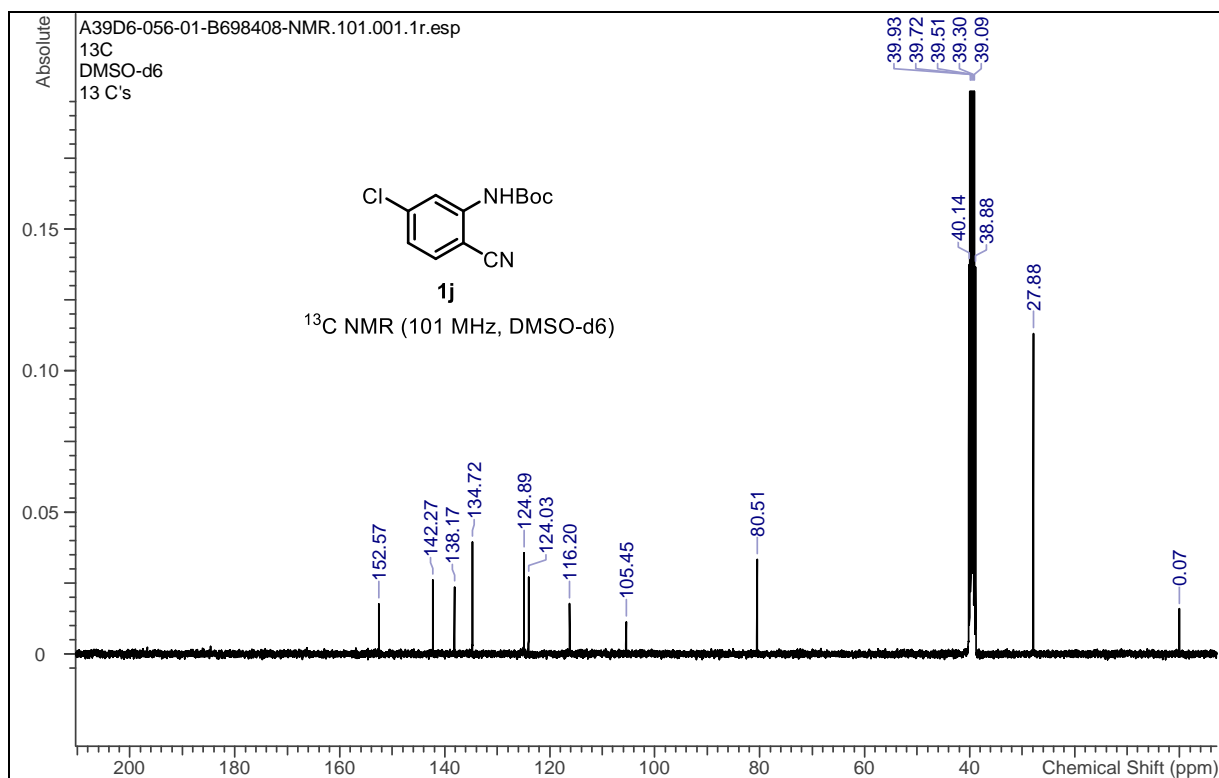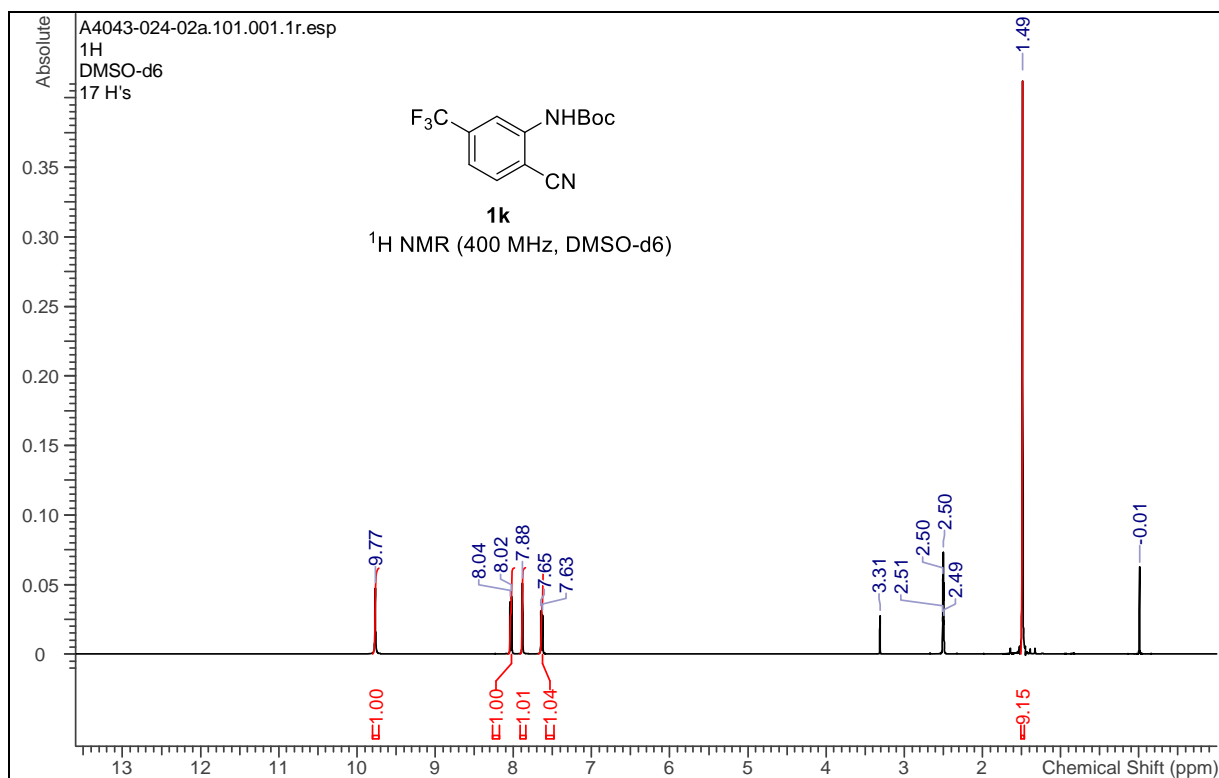



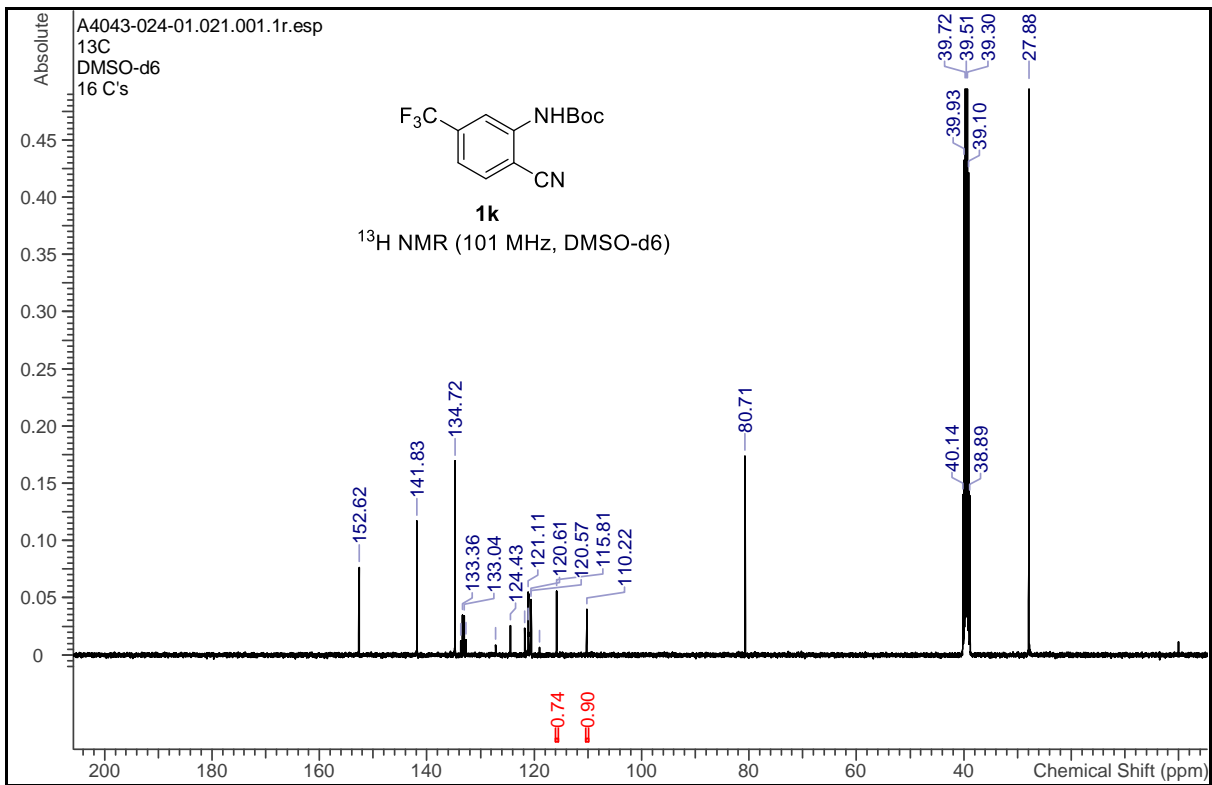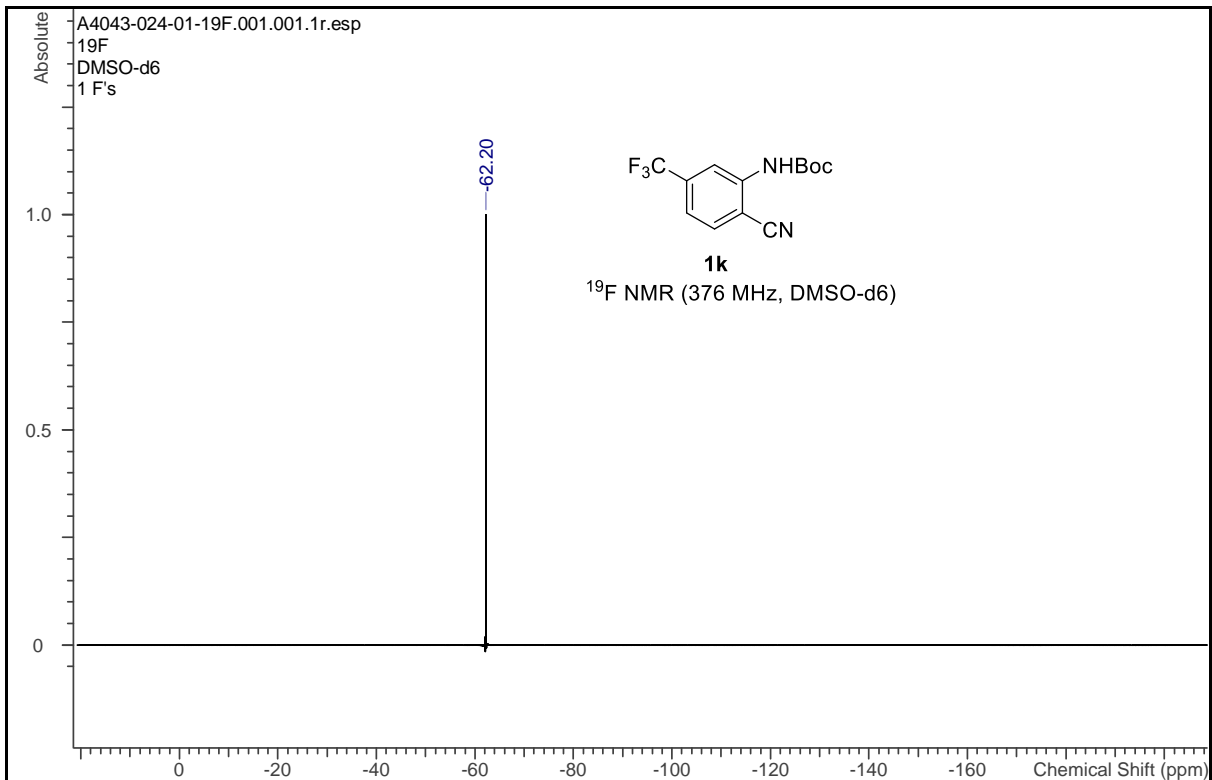

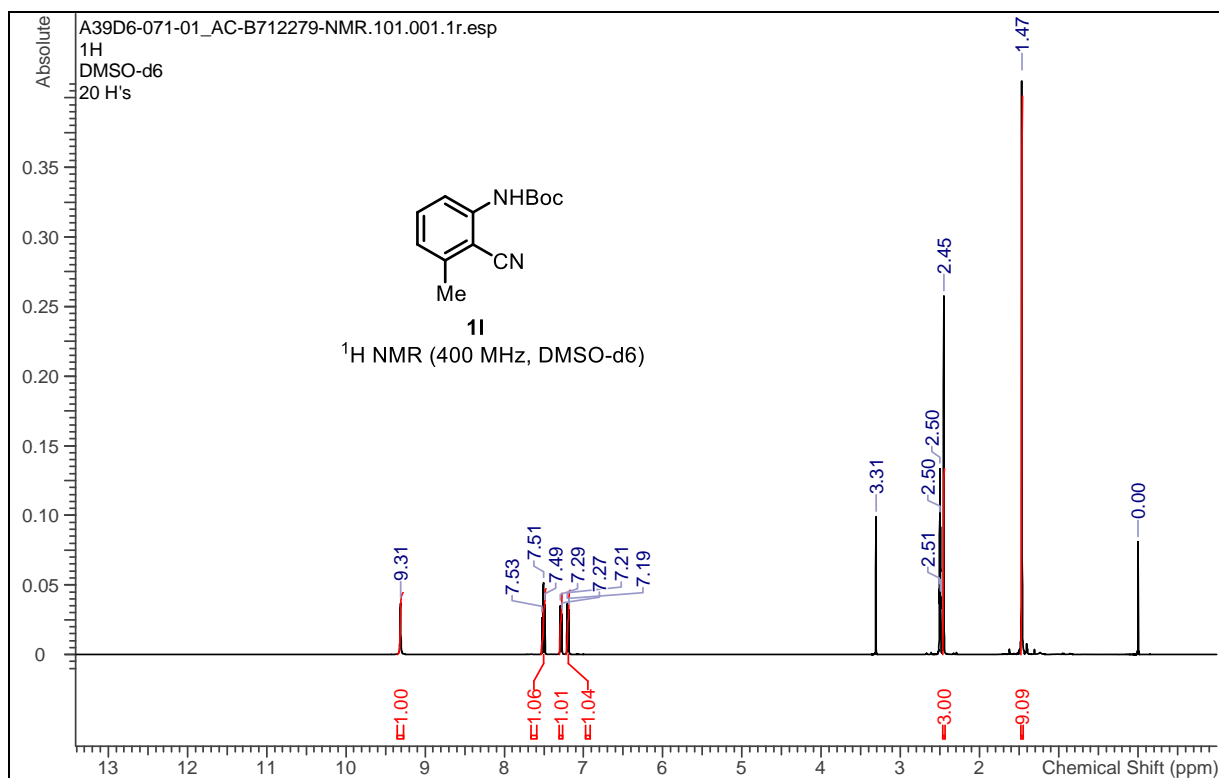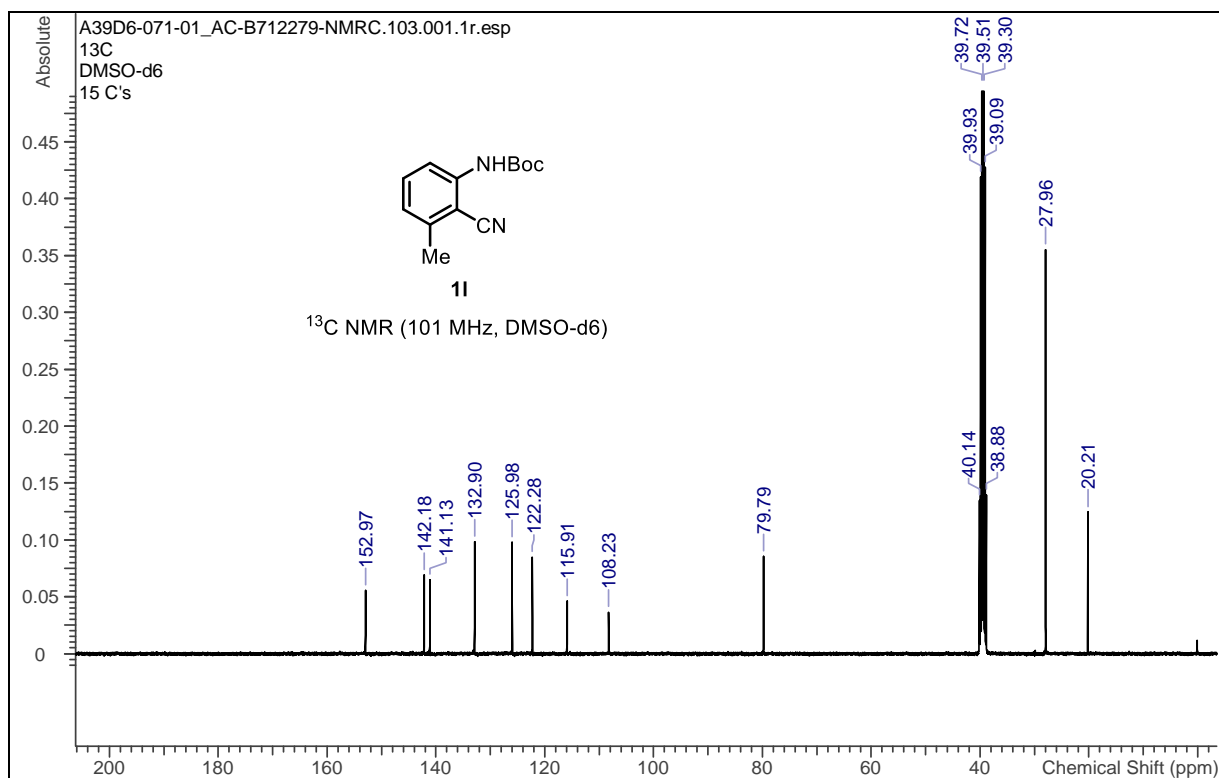

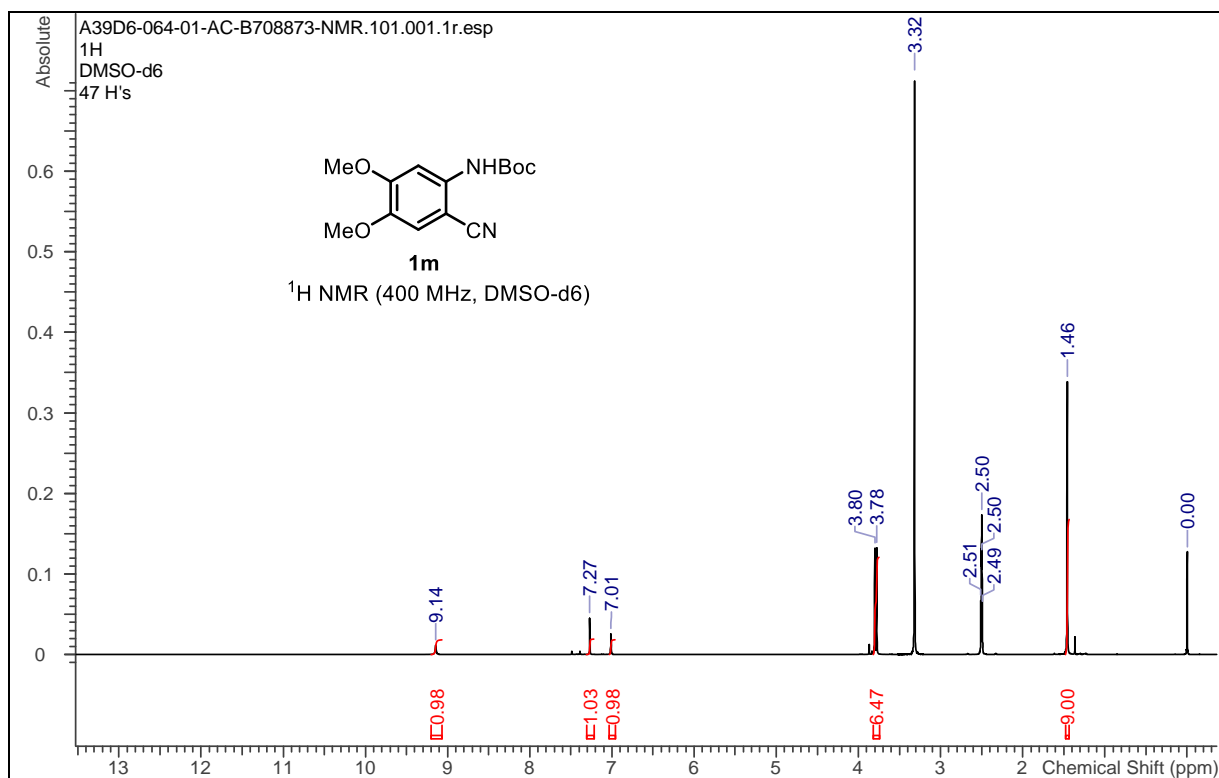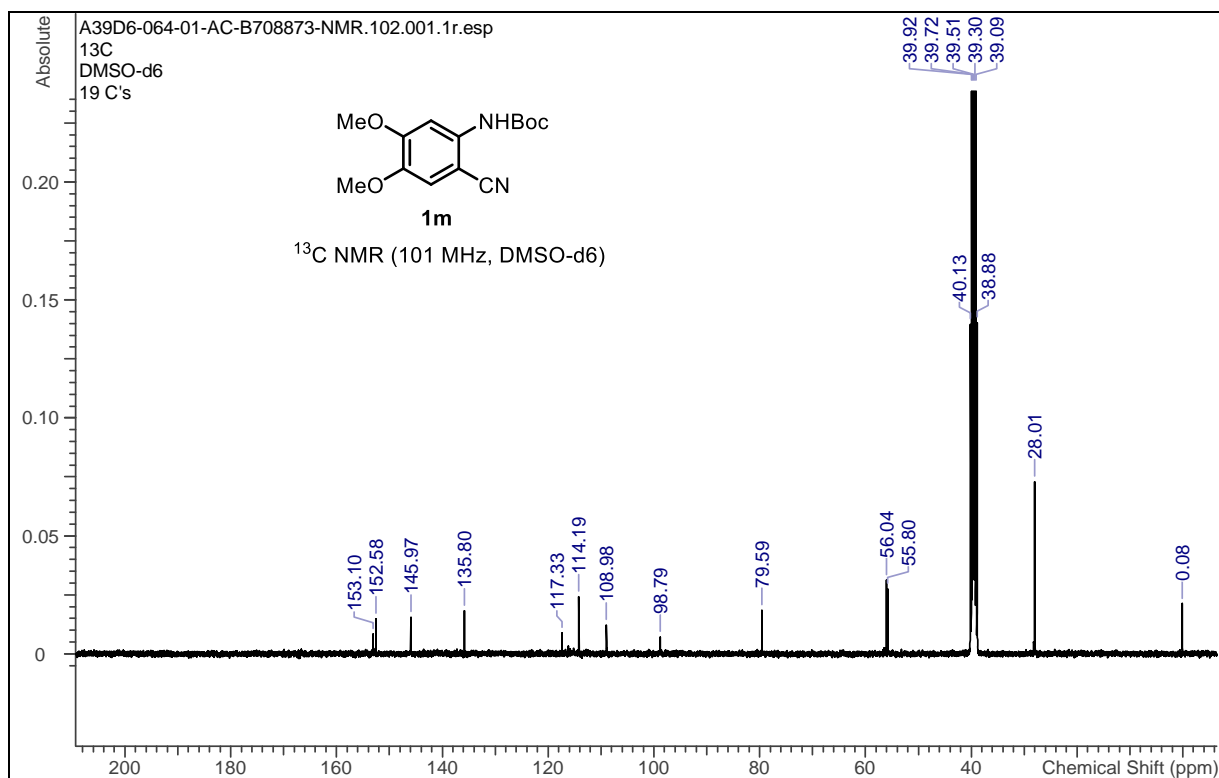

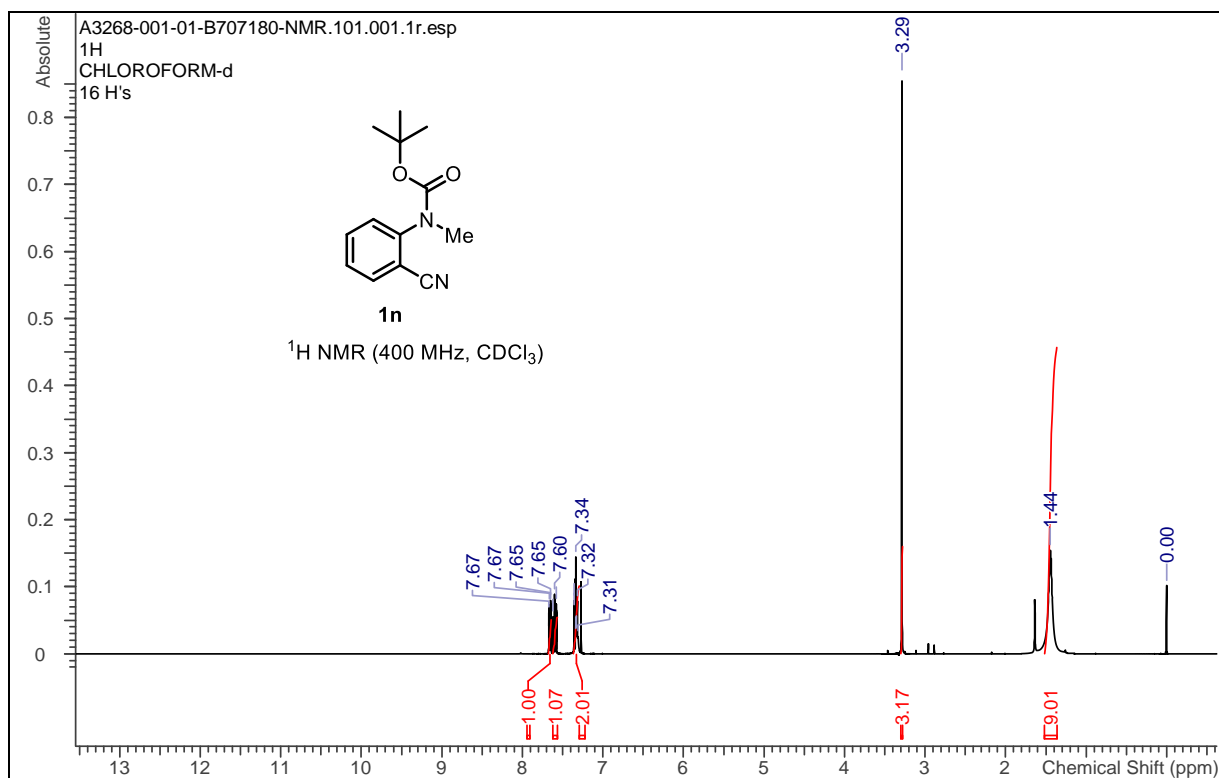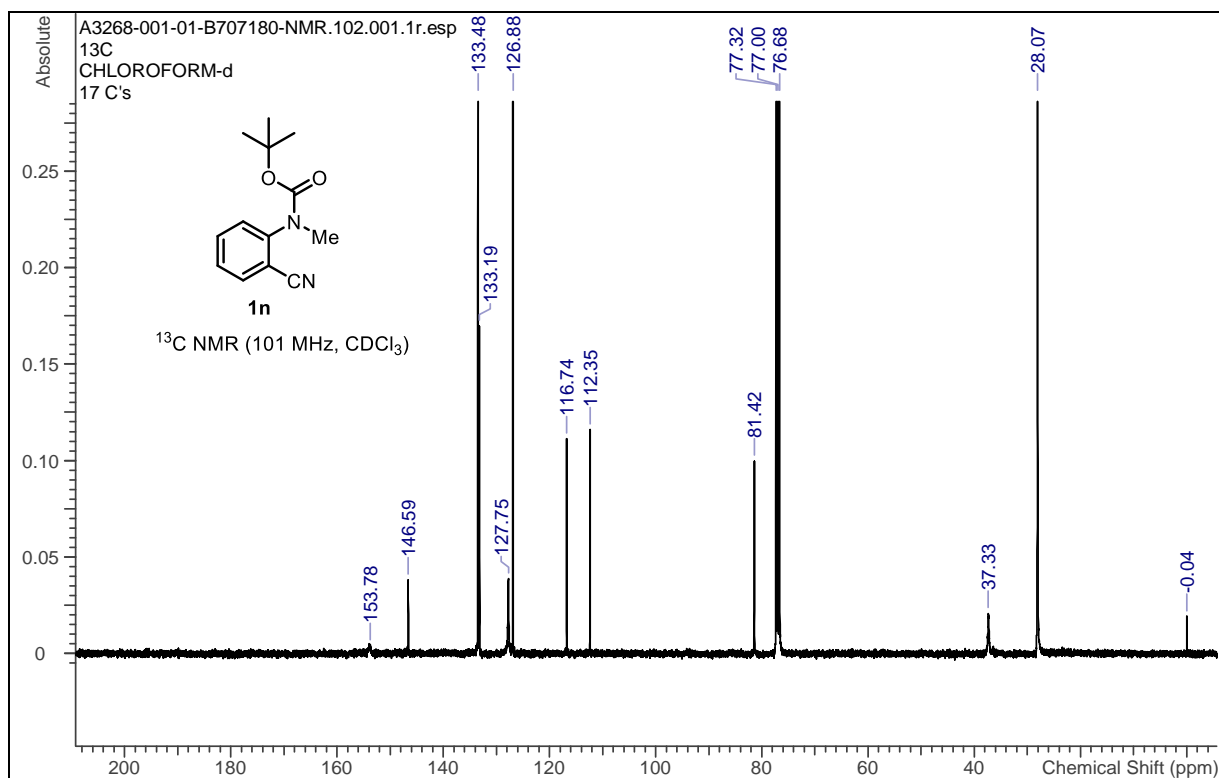

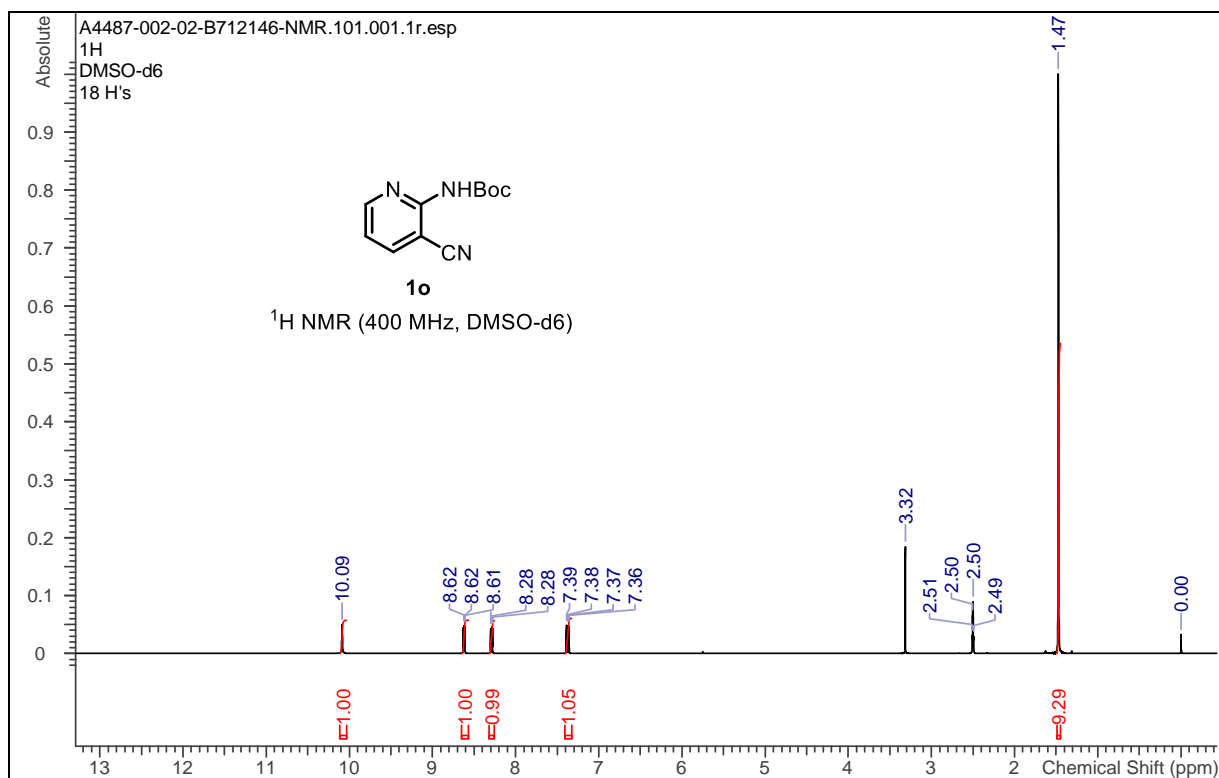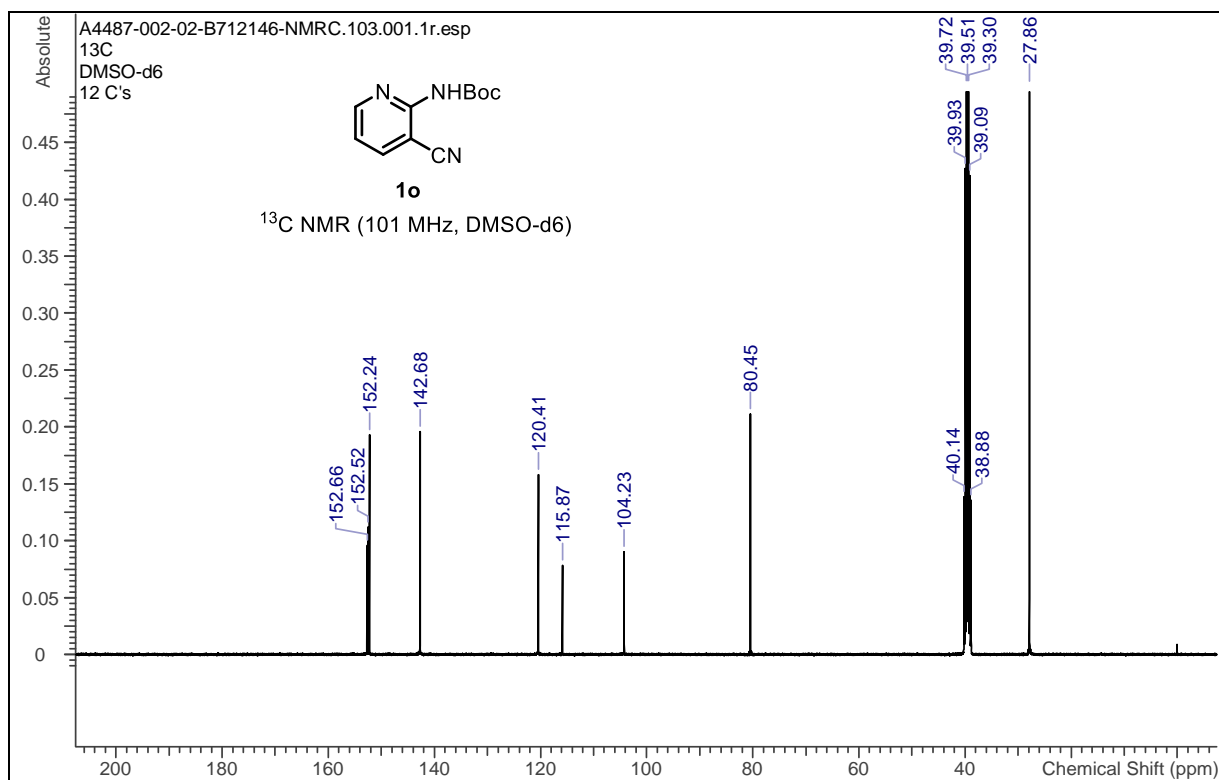

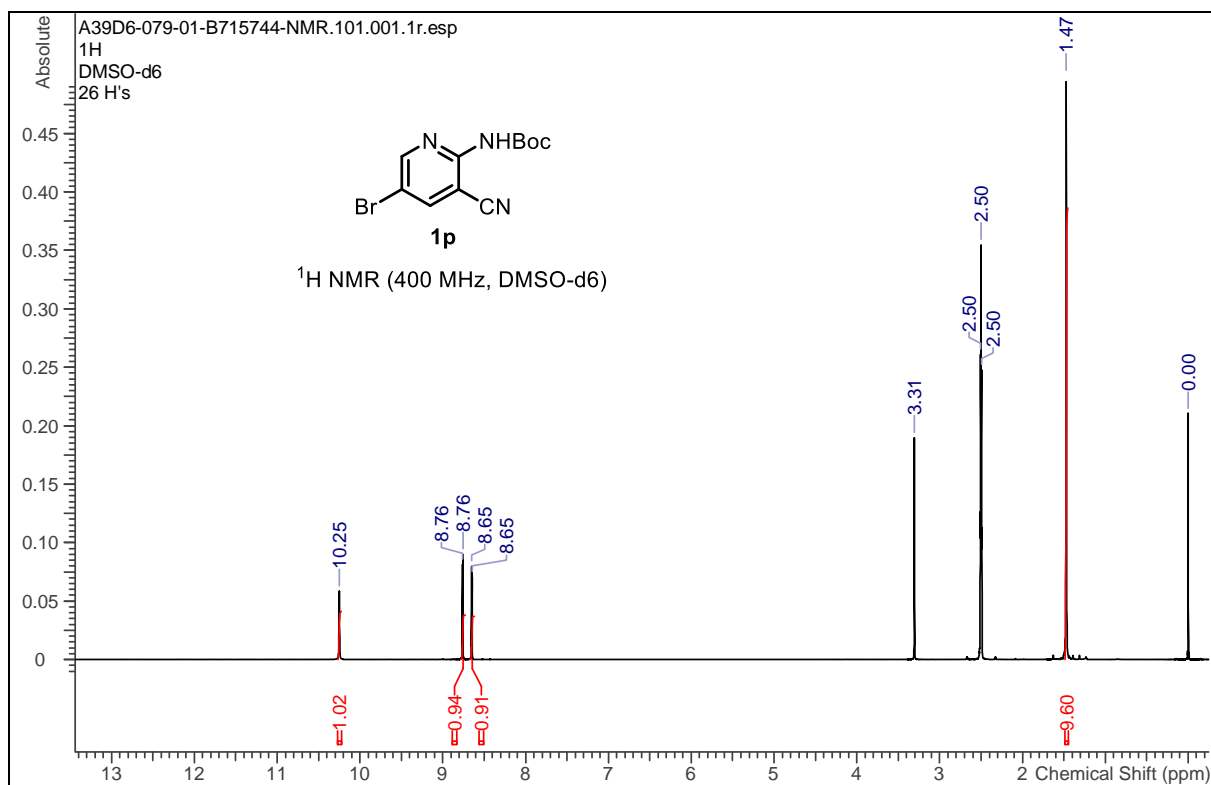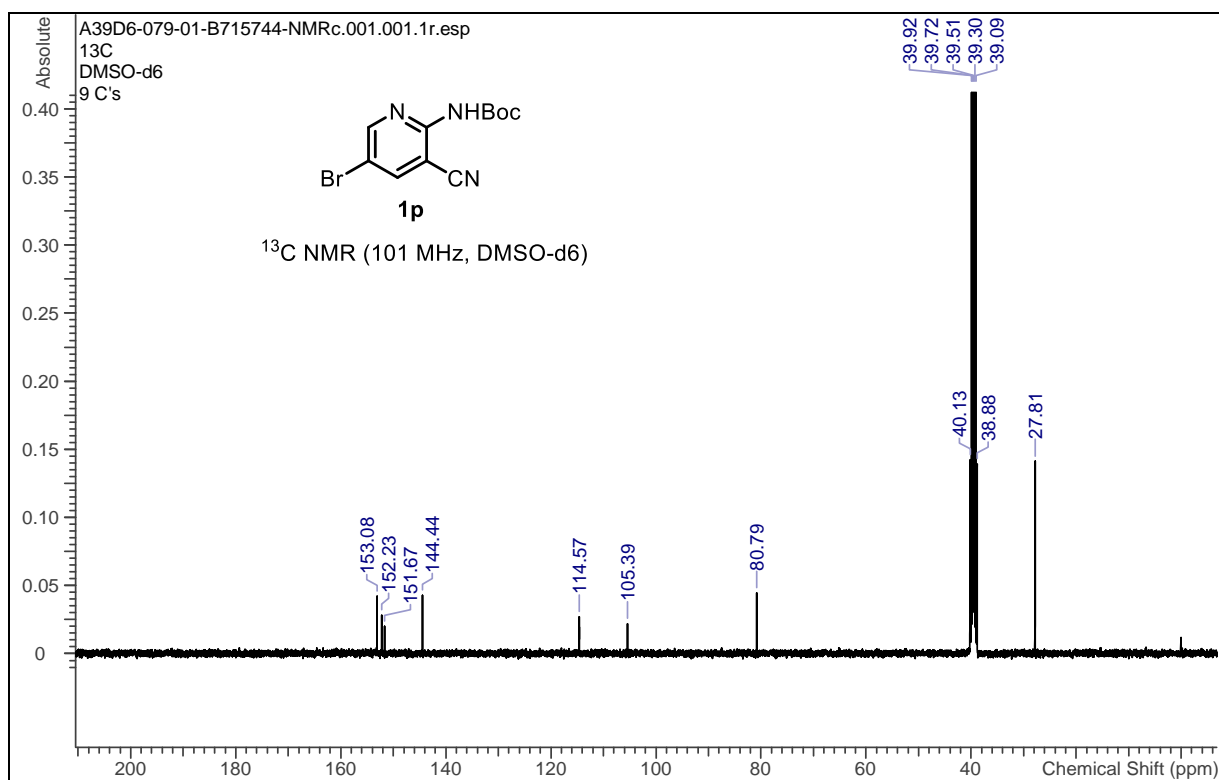

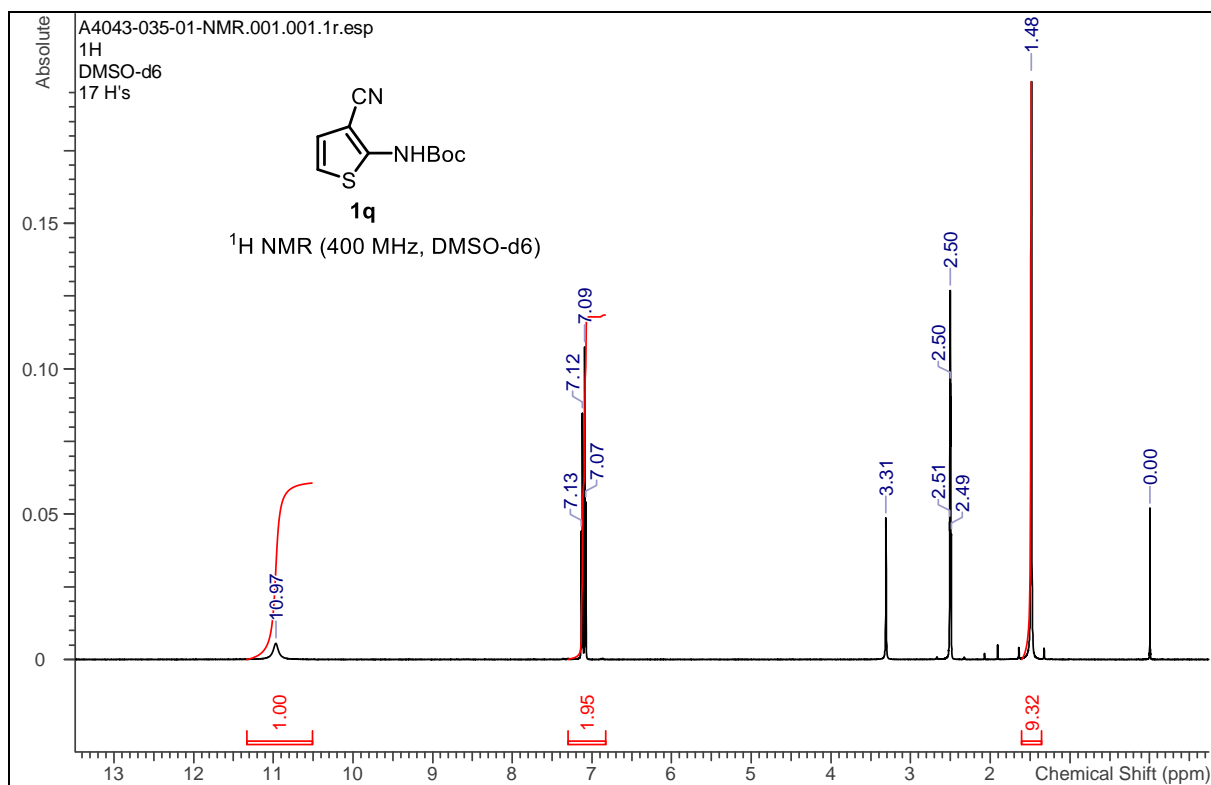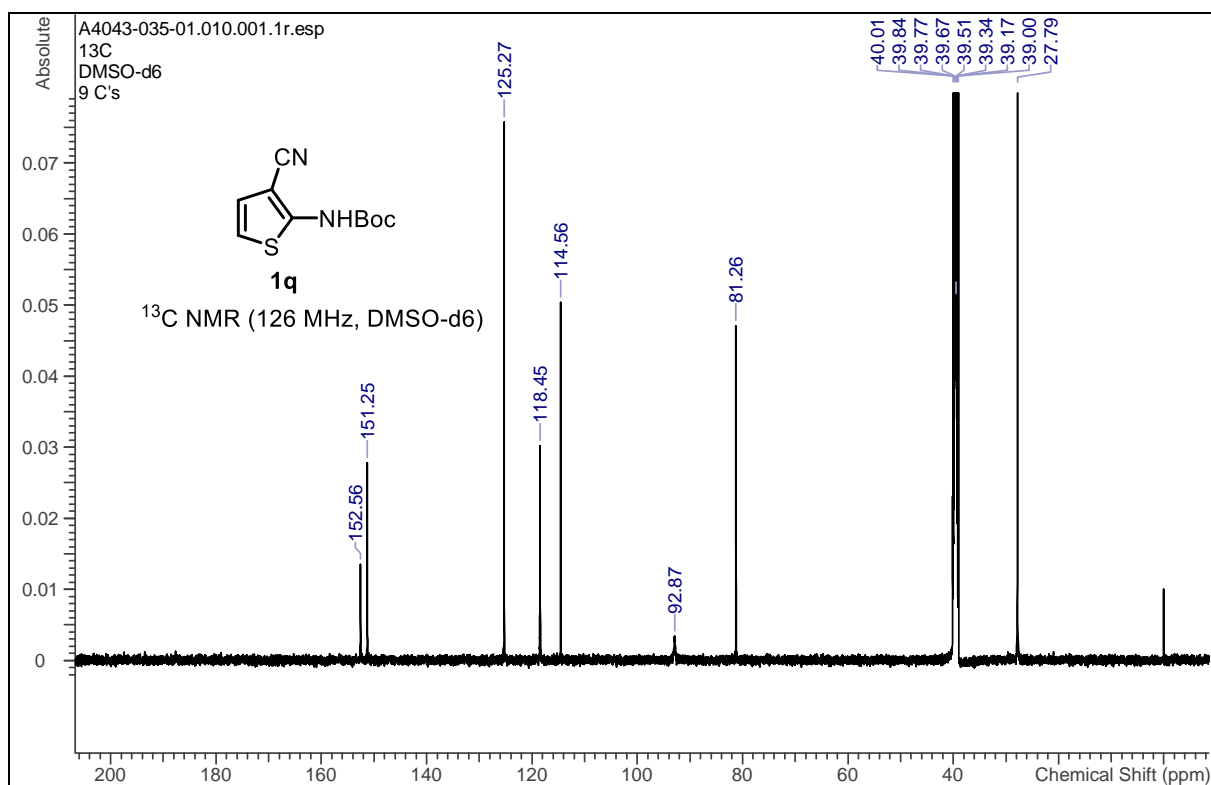

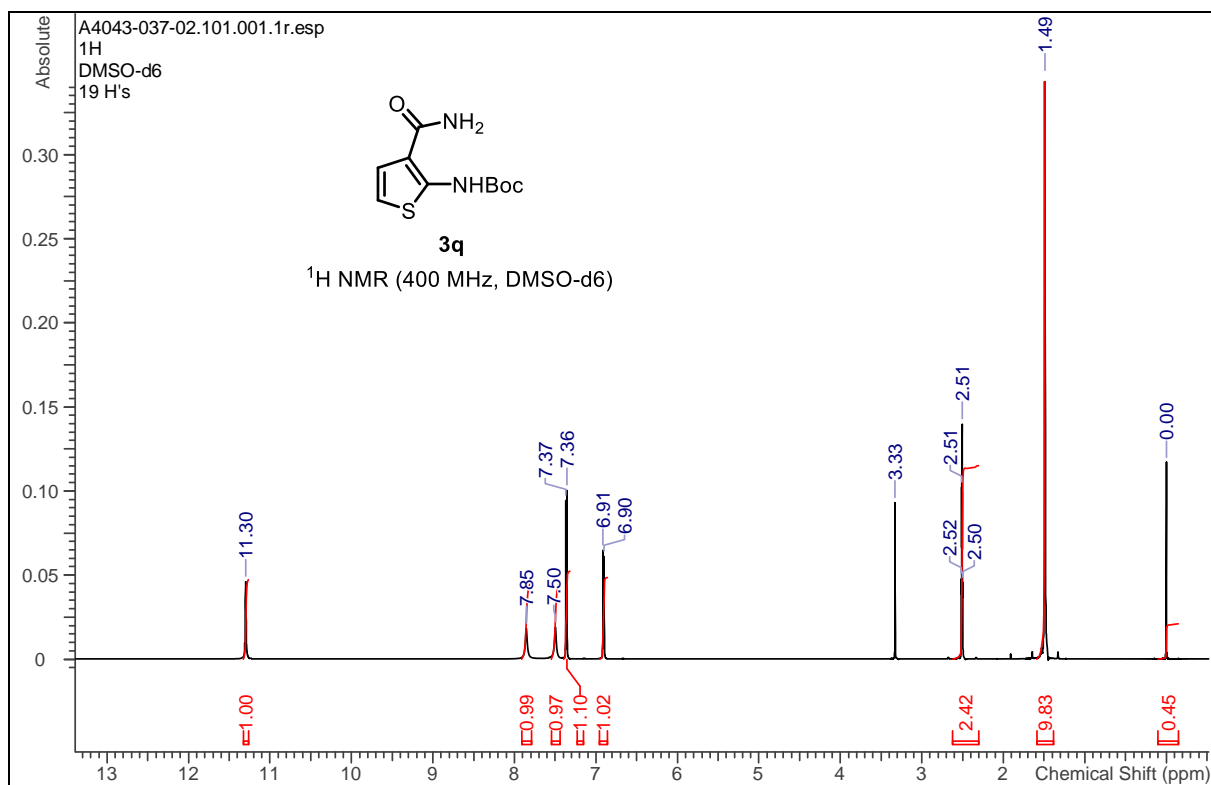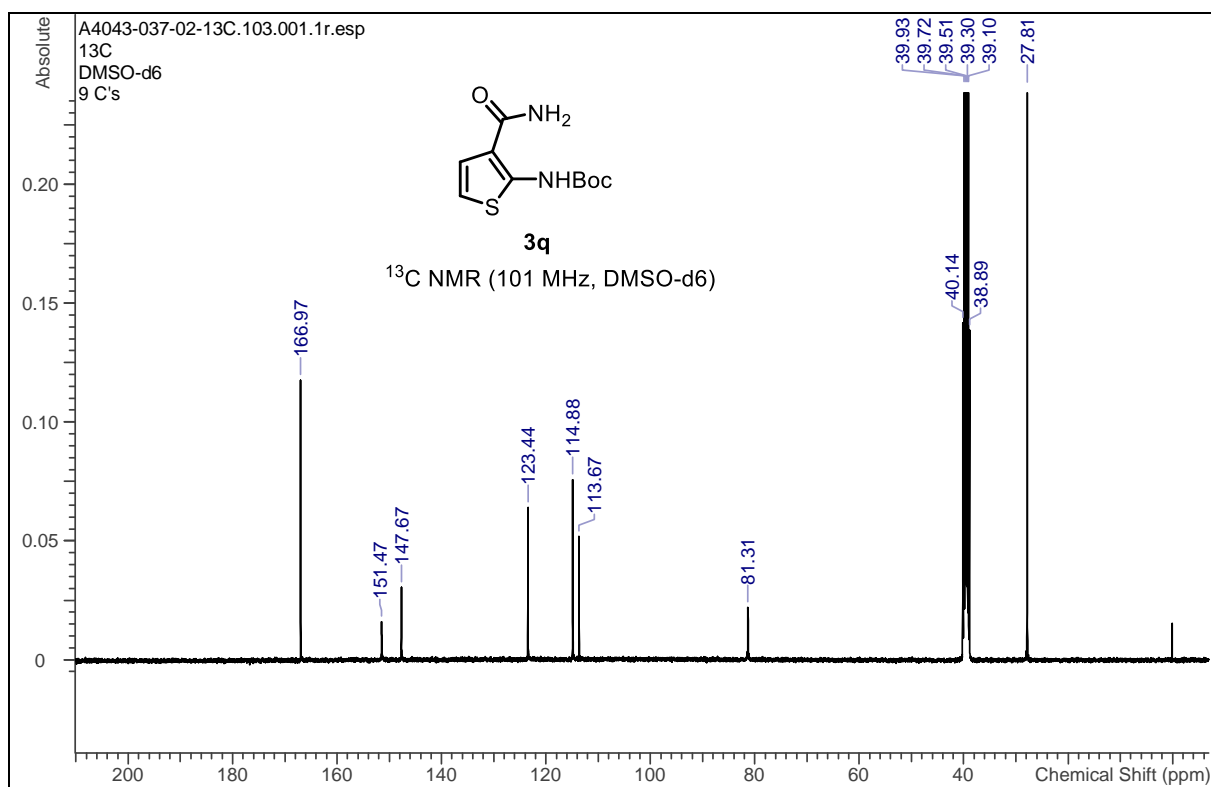

Supplement: d4ob00885e1.pdf [file d4ob00885e1.pdf]
